# Recombination suppression and selection affect local ancestries in genomes of a migratory songbird

Jun Ishigohoka<sup>†,1</sup>      Karen Bascón-Cardozo<sup>†,1</sup>      Andrea Bours<sup>1</sup>      Janina Fuß<sup>2</sup>  
 Arang Rhie<sup>3</sup>      Jacquelyn Mountcastle<sup>4</sup>      Bettina Haase<sup>4</sup>      William Chow<sup>5</sup>  
 Joanna Collins<sup>5</sup>      Kerstin Howe<sup>5</sup>      Marcela Uliano-Silva<sup>5</sup>      Olivier Fedrigo<sup>4</sup>  
 Erich D. Jarvis<sup>4,6,7</sup>      Javier Pérez-Tris<sup>8</sup>      Juan Carlos Illera<sup>9</sup>  
 Miriam Liedvogel<sup>1,10,\*</sup>

<sup>1</sup>Max Planck Institute for Evolutionary Biology, Plön, Germany

<sup>2</sup>Institute of Clinical Molecular Biology (IKMB), Kiel University, Kiel, Germany

<sup>3</sup>Genome Informatics Section, Computational and Statistical Genomics Branch, National Human Genome Research Institute, National Institutes of Health, Bethesda, MD, USA

<sup>4</sup>The Vertebrate Genome Lab, Rockefeller University, New York, NY, USA

<sup>5</sup>Wellcome Sanger Institute, Cambridge, UK

<sup>6</sup>Laboratory of Neurogenetics of Language, Rockefeller University, New York, NY, USA

<sup>7</sup>The Howards Hughes Medical Institute, Chevy Chase, MD, USA

<sup>8</sup>Department of Biodiversity, Ecology and Evolution, Complutense University of Madrid, Madrid, Spain

<sup>9</sup>Biodiversity Research Institute (CSIC-Oviedo University-Principality of Asturias), Oviedo University, Mieres, Spain

<sup>10</sup>Institute of Avian Research, Wilhelmshaven, Germany

<sup>†</sup> These authors contributed equally to this work.

\* Correspondence: [Miriam Liedvogel <miriam.liedvogel@ifv-vogelwarte.de>](mailto:Miriam.Liedvogel@ifv-vogelwarte.de)

# Abstract

The patterns of genetic relatedness among individuals vary along the genome, representing fluctuation of local ancestry. The factors responsible for this variation have not been well studied in wild animals with ecological and behavioural relevance. Here, we characterise the genomic architecture of genetic relatedness in the Eurasian blackcap, an iconic songbird species in ecology and quantitative genetics of migratory behaviour. We identify 23 genomic regions with deviated local relatedness patterns, using a chromosome-level *de novo* assembly of the blackcap genome and whole-genome resequencing data of 179 individuals from nine populations with diverse migratory phenotypes. Five genomic regions show local relatedness patterns of polymorphic inversions, three of which are syntenic to polymorphic inversions known in the zebra finch. Phylogenetic analysis reveals these three polymorphic inversions evolved independently in the blackcap and zebra finch indicating convergence of polymorphic inversions. Population genetic analyses in these three inversions in the blackcap suggest balancing selection between two haplotypes in one locus and background selection in the other two loci. One genomic region with deviated local relatedness is under selection against gene flow by population-specific reduction in recombination rate. Other genomic islands including 11 pericentromeric regions consist of evolutionarily conserved and non-conserved recombination cold-spots under background selection. Two of these regions with non-conserved recombination suppression are known to be associated with population-specific migratory phenotypes, where local relatedness patterns support additional effects of population-specific selection. These results highlight how different forms of recombination suppression and selection jointly affect heterogeneous genomic landscape of local ancestries.

## 23 Introduction

24 The effect of population structure and selection on realised genetic relatedness can be distributed  
 25 heterogeneously along a chromosome (Mathieson and Scally 2020). This heterogeneity arises  
 26 through recombination events breaking linkage between two neighbouring loci, resulting in  
 27 different genetic ancestries along a chromosome. Recombination cold-spots —genomic regions  
 28 with suppressed recombination— can mediate changes in genomic local ancestries both directly  
 29 and indirectly. As a direct effect, suppressed recombination between sequences from different  
 30 populations at barrier loci results in faster sorting of lineages than genomic background (Wu  
 31 2001; Butlin 2005; Nachman and Payseur 2012; Hejase et al. 2020). Indeed, recombination rate  
 32 variation is correlated with admixture proportion, suggesting that recombination landscapes  
 33 play a highly polygenic and general roles in shaping local relatedness patterns (Martin et  
 34 al. 2019). As an indirect effect, linked selection can also change local relatedness patterns  
 35 at recombination cold-spots. For example, species-wide long-term background selection  
 36 (i.e. hitchhiking effects by purifying/negative selection against deleterious mutations) reduces  
 37 genetic variation at recombination cold-spots in all populations (Roesti et al. 2013; Burri 2017;  
 38 Vijay et al. 2017). On the other hand, population-specific selective sweeps (i.e. hitchhiking  
 39 effects by positive selection for beneficial mutations), reduce genetic variation at recombination  
 40 cold-spots in certain populations (Burri 2017; Vijay et al. 2017; Hejase et al. 2020).

41 Principal component analysis (PCA) has been widely used to infer population structure  
 42 by summarising and visualising genetic relatedness among samples based on a genotype matrix  
 43 (Patterson et al. 2006; Price et al. 2006). When applied to a whole-genome genotype matrix,  
 44 results of PCA often represent biogeography and history of the populations to which the  
 45 samples belong, averaging variation of local relatedness patterns along the genome (Becquet et  
 46 al. 2007; Paschou et al. 2007; Gautier et al. 2009; Willing et al. 2010). To capture fluctuating  
 47 patterns of local relatedness along chromosomes, Li and Ralph (2019) developed “local PCA  
 48 (**lostruct**)”. In this method, PCA is performed in sliding genomic windows to summarise  
 49 local genetic distances among individuals. Similarities among the genomic windows based on  
 50 the PCA results are then summarised with multidimensional scaling (MDS), whereby genomic  
 51 regions with deviated local relatedness patterns are identified. In recent studies, local PCA

was applied to support discoveries of polymorphic inversions (Huang et al. 2020; Perrier et al. 2020; Todesco et al. 2020; Mérot et al. 2021) as well as other evolutionary factors that deviate local relatedness patterns (Fuller et al. 2020; Paris et al. 2021).

The Eurasian blackcap (*Sylvia atricapilla*) is a songbird species that exhibits variation in phenotypes of seasonal migration, specifically orientation, distance, and propensity to migrate (Berthold 1988; Berthold 1991; Helbig 1991). Blackcap populations breeding in central and northern Europe migrate over medium to long distances, while some populations breeding on the Iberian Peninsula migrate over short distances. Some continental populations in northern Africa and the Iberian Peninsula as well as island populations (including the Macaronesian and Mediterranean islands) are resident, i.e. breeding and wintering at the same geographic locations (Berthold 1988; Cuadrado 1994; Pérez-Tris et al. 1999; Aymí et al. 2020). These blackcap populations have split recently (~30,000 years ago) and have differentiated their migratory phenotypes (Delmore et al. 2020). Although the iconic blackcap has been used to demonstrate the presence of genetic basis of migration and to study evolutionary history of diverged migratory phenotypes, the genomic architecture of relatedness patterns is poorly understood.

In this study, we characterise genomic architecture of local relatedness patterns in the blackcap. By applying local PCA to whole-genome resequencing data of 179 blackcaps from nine populations covering the full range of migratory phenotypes, we identify genomic islands of deviated relatedness patterns. Using population and comparative genomics, we characterise these genomic islands to understand different factors associated with deviated local relatedness patterns. We find different types of selection plays roles in deviating local relatedness patterns, including balancing and background selection at polymorphic inversions, selection against gene flow at a genomic region in which recombination rate is reduced in certain populations, and background selection at conserved and non-conserved recombination cold-spots, two of which are under selection specifically in certain migratory phenotypes. These results highlight how different types of selection and recombination suppression deviate local ancestries along genomes.

## Results

To address our questions about genomic architecture of local ancestries, we generated a high-quality, chromosomal-level reference genome of the blackcap using the Vertebrate Genomes Project pipeline v1.5 (Rhie et al. 2021). Blood of a female from the non-migrant Tarifa, Spain population, was collected and chosen in order to assemble both Z and W sex chromosomes. We generated contigs from Pacbio long reads, sorted haplotypes, and scaffolded sequentially with 10X Genomics linked reads, Bionano Genomics optical mapping, and Arima Genomics Hi-C linked reads. Base call errors were polished with both PacBio long reads and Arrow short reads to achieve above Q40 accuracy (no more than 1 error every 10,000 bp). Manual curation identified 33 autosomes and Z and W chromosomes (plus 1 unlocalised W). Autosomes were named in decreasing order of size, and all had counterparts in the commonly used VGP reference zebra finch assembly. The final 1.1 Gb assembly had 99.14% assigned to chromosomes, with a contig N50 of 7.4 Mb, and scaffold N50 of 73 Mb, indicating a high-quality assembly that fulfills the VGP standard metrics. The primary and alternate haplotype assemblies can be found under NCBI BioProject PRJNA558064, accession numbers GCA\_009819655.1 and GCA\_009819715.1.

### Local PCA identifies genomic regions with deviated relatedness patterns

To identify genomic regions with deviated relatedness patterns, we performed local PCA (Li and Ralph 2019). We found 23 genomic islands of deviated relatedness patterns in the blackcap genome (Fig. 1A, B, Table 1). All genomic islands were located on different chromosomes. In the MDS space, windows within a genomic island deviated to the same direction compared to the rest of the same chromosome (Fig. 1C, D, Supplementary Fig. 2). This suggests that each genomic island has a distinct relatedness pattern that differs from the whole-genome population structure, instead of greater stochasticity of local genetic ancestries.

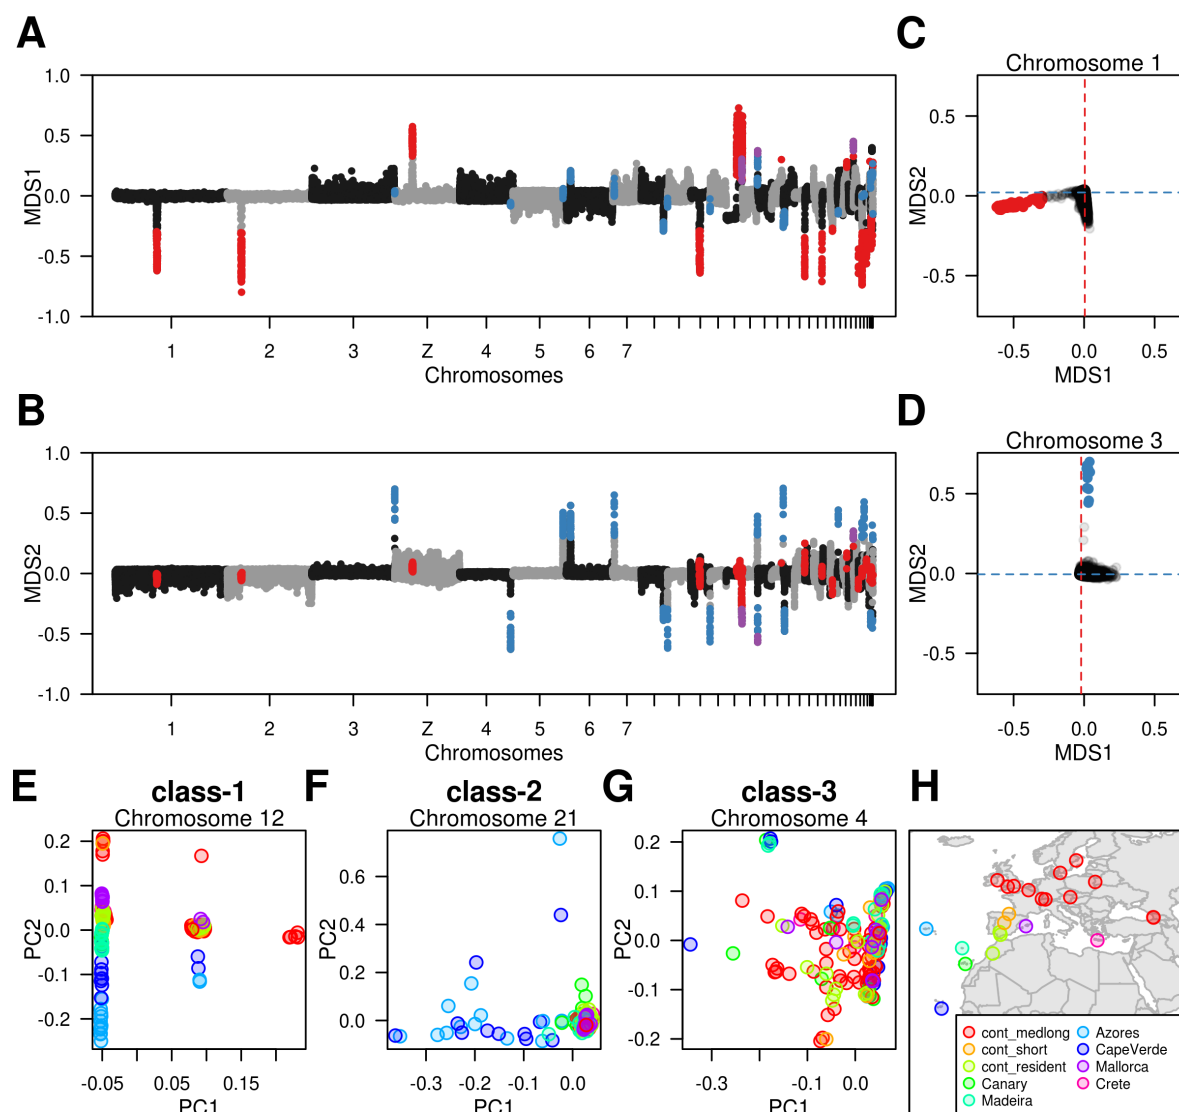

**Figure 1:** Genomic regions with deviated relatedness patterns identified by local PCA. **A, B.** Genomic distribution of the first (**A**) and second (**B**) coordinates of MDS performed on distance matrices summarising local relatedness patterns. Outlier windows along the first, second, and both coordinates are highlighted by red, blue, and purple points respectively. Black and grey are the different chromosomes. **C, D.** Distribution of the first and second MDS coordinates of all windows on chromosome 1 (**C**) and chromosome 3 (**D**). Red and blue dotted lines depict the modes of the distribution of the first and second MDS coordinate values in each chromosome. **E, F, G.** Example PCA showing local relatedness patterns at three different classes of genomic islands of deviated relatedness patterns. Relatedness patterns for all genomic islands are in Supplementary Fig. 3. **H.** Sampling sites of blackcap populations. Note samples collected in UK and Ireland were wintering individuals, and samples of Sweden were sampled during autumn migration, meaning they do not represent breeding sites. Details are in Supplementary Table 1.

**Table 1:** Genomic islands of deviated relatedness patterns

| Chromosome    | From [bp]   | To [bp]     | Length [bp] | Class   |
|---------------|-------------|-------------|-------------|---------|
| Chromosome 1  | 56,429,355  | 57,680,228  | 1,250,873   | Class-3 |
| Chromosome 2  | 18,283,847  | 19,843,654  | 1,559,807   | Class-3 |
| Chromosome 3  | 113,149,156 | 113,322,425 | 173,269     | Class-3 |
| Chromosome 4  | 69,463,589  | 69,689,233  | 225,644     | Class-3 |
| Chromosome 5  | 68,040,302  | 68,437,900  | 397,598     | Class-3 |
| Chromosome 6  | 5,684,792   | 6,260,313   | 575,521     | Class-1 |
| Chromosome 7  | 2,095,617   | 2,326,952   | 231,335     | Class-3 |
| Chromosome 8  | 30,328,930  | 30,667,673  | 338,743     | Class-3 |
| Chromosome 9  | 126,580     | 308,945     | 182,365     | Class-3 |
| Chromosome 10 | 11,598,148  | 13,172,787  | 1,574,639   | Class-3 |
| Chromosome 11 | 25,880      | 281,536     | 255,656     | Class-3 |
| Chromosome 12 | 14,126,710  | 22,227,355  | 8,100,645   | Class-1 |
| Chromosome 13 | 20,278,150  | 20,541,860  | 263,710     | Class-3 |
| Chromosome 14 | 43          | 259,166     | 259,123     | Class-1 |
| Chromosome 15 | 15,867,297  | 16,041,663  | 174,366     | Class-3 |
| Chromosome 16 | 1,538,020   | 1,833,803   | 295,783     | Class-3 |
| Chromosome 17 | 13,950,030  | 14,169,136  | 219,106     | Class-3 |
| Chromosome 18 | 50,012      | 248,016     | 198,004     | Class-3 |
| Chromosome 20 | 31,416      | 346,974     | 315,558     | Class-3 |
| Chromosome 21 | 3,113,076   | 3,331,583   | 218,507     | Class-2 |
| Chromosome 28 | 917,037     | 1,154,843   | 237,806     | Class-1 |
| Chromosome 30 | 105,195     | 1,372,664   | 1,267,469   | Class-1 |
| Chromosome Z  | 23,465,390  | 24,634,496  | 1,169,106   | Class-3 |

104 To classify genomic islands of deviated relatedness patterns, we performed PCA for each  
105 genomic island, this time using all SNPs within a given genomic island (Supplementary Fig. 3).  
106 We grouped genomic islands of deviated relatedness patterns into three classes: class-1 defined

as genomic islands where samples were clustered into three groups along either PC1 or PC2 axes (Fig. 1E); class-2 defined as genomic islands where particular population(s) diverged from the other populations (Fig. 1F); and class-3 for all other genomic islands without characteristic patterns (Fig. 1G).

## Polymorphic inversions with different types of selection in class-1 genomic islands

Five class-1 genomic islands were located on chromosomes 6, 12, 14, 28, and 30 (Supplementary Fig. 3G, M, O, V, W, Table 1). On the PCA, PC1 separated samples into three groups (Fig. 2A, C), except for the one on chromosome 14 in which clustering occurred along PC2 (Fig. 2B). This parallels with the pattern of eigenvalues: the ratio of eigenvalue of the PC1 to that of the PC2 was high in class-1 genomic islands except for chromosome 14 (Supplementary Fig. 4).

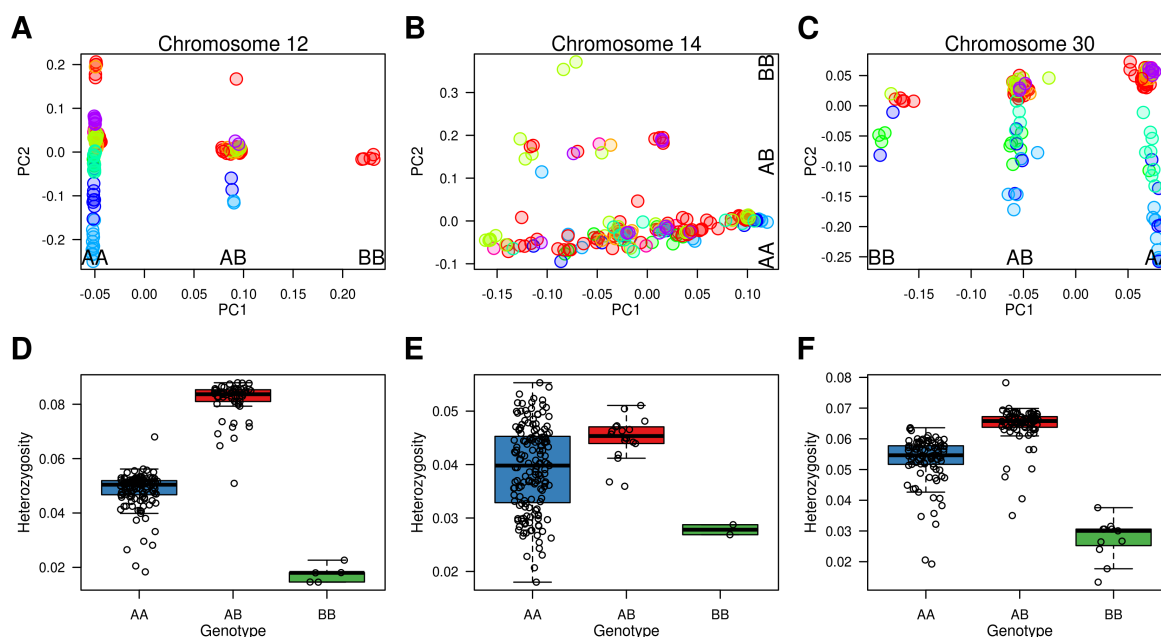

**Figure 2:** Class-1 genomic islands of deviated relatedness patterns, exemplified for those on chromosomes 12, 14, and 30. **A, B, C.** PCA showing local relatedness patterns at three class-1 genomic islands. The inferred inversion genotypes (AA, AB, BB) are indicated along the respective PC axes. Data points depict blackcap individuals and colours show populations indicated in Fig. 1H. **D, E, F.** Heterozygosity at the three class-1 genomic islands for each putative inversion genotype. Results of Mann-Whitney U tests comparing heterozygosity between genotypes are in Supplementary Table 2.



119 The observed pattern of the PCA with three clusters of samples is indicative of a  
120 polymorphic inversion, with the groups at the two edges being homozygous for one of the two  
121 haplotypes (the normal and inverted arrangements) and the middle being heterozygous (Ma and  
122 Amos 2012; Ruiz-Arenas et al. 2019; Mérot 2020). We inspected soft-clipped read alignments  
123 associated with PCA-based genotypes and found one putative breakpoint for chromosomes 12  
124 and 30 (Supplementary Fig. 7A, B). To investigate whether population genetic measures fit  
125 expectations for the scenario of polymorphic inversions in class-1 genomic islands, we named  
126 major and minor haplotypes A and B (Fig. 2A-C) and calculated heterozygosity in the AA,  
127 AB and BB samples. If these three groups of samples on the PCA represent three genotypes  
128 of a polymorphic inversion, heterozygosity of the AB samples is expected to be higher than  
129 the AA and BB samples (Knief et al. 2017; Huang et al. 2018). Indeed, the AB samples  
130 had higher heterozygosity than the AA and BB samples within class-1 genomic islands, and  
131 BB had the lowest heterozygosity (Fig. 2D-F, Supplementary Fig. 6, Supplementary Table  
132 2). To characterise ancestral (normal) and derived (inverted) haplotypes, we performed an  
133 additional PCA using blackcap samples with two of their closest sister species resequenced  
134 on the blackcap reference assembly (five samples of garden warblers *Sylvia borin* and three  
135 samples of African hill babblers *Sylvia abyssinica*). In PCA for all class-1 genomic islands, the  
136 sister species were placed either between the AA and AB (i.e. closer to the AA than BB on  
137 chromosomes 12, 28, and 30) or clustered with the blackcap AA samples (on chromosomes  
138 6 and 14) along the PC axis separating three blackcap genotypes (Supplementary Fig. 5),  
139 indicating the haplotype B is the derived allele with inverted arrangement.

140 To investigate genetic variation in class-1 genomic islands, we calculated nucleotide  
141 diversity ( $\pi$ ) for each genotype, as well as absolute divergence ( $d_{XY}$ ) and relative differentiation  
142 ( $F_{ST}$ ) between homozygous AA and BB samples for comparisons between the two haplotypes  
143 (class-1 genomic island on chromosome 6 was not analysed as only one sample was BB  
144 genotype). On chromosomes 12 and 30, both  $F_{ST}$  and  $d_{XY}$  between AA and BB samples were  
145 elevated within class-1 genomic islands (Fig. 3A-F, G, I, K, Supplementary Table 4), suggesting  
146 divergence between A and B haplotypes. In these two regions,  $\pi$  was low in the BB samples  
147 (Fig. 3D, F, H, L, Supplementary Table 3). Also in class-1 genomic island on chromosome

148 14,  $F_{ST}$  but not  $d_{XY}$  between AA and BB was elevated (Fig. 3B, E, I, Supplementary Table  
 149 4).  $\pi$  was decreased for both AA and BB samples in this region (Fig. 3E, J, Supplementary  
 150 Table 3), suggesting loss of genetic variation is responsible for increased  $F_{ST}$  in this region.  
 151 Lastly, the genomic island on chromosome 28 did not show elevated  $F_{ST}$  between AA and BB  
 152 (Supplementary Fig. 8, Supplementary Table 4).

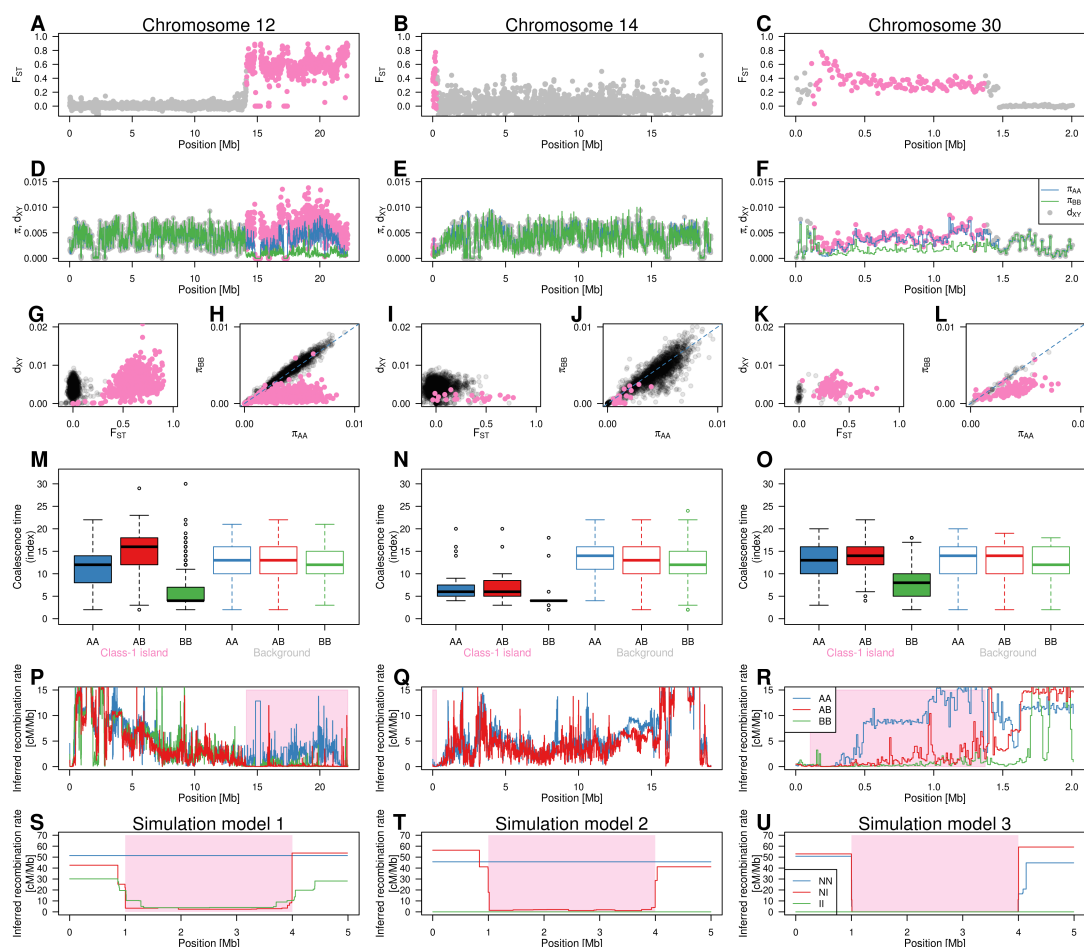

**Figure 3:** Population genomics at class-1 genomic islands. **A, B, C.**  $F_{ST}$  between the AA and BB samples. Pink indicates genomic windows within class-1 genomic islands. Result for chromosome 28 is in Supplementary Fig. 8. **D, E, F.**  $d_{XY}$  between the AA and BB samples (gray and pink points respectively for chromosomal background and within class-1 genomic islands) and  $\pi$  of AA (blue line) and BB (green line) samples. Result for chromosome 28 is in Supplementary Fig. 8. For **A-F**, chromosome 6 was excluded from the analyses due to the small sample size for BB. **G, I, K.** Relationship between  $F_{ST}$  and  $d_{XY}$  in class-1 genomic islands (pink) and chromosomal background (black). Results of permutation tests of  $F_{ST}$ ,  $d_{XY}$ , and  $\pi$  comparing within and outside class-1 genomic islands are in Supplementary Tables 3, 4. **H, J, L.** Relationship between  $\pi$  of AA and BB in class-1 genomic islands (pink) and chromosomal background (black). **M, N, O.** Coalescent time between a pair of chromosomal segments taken from diploid samples of the three genotypes (AA in blue, AB in red, BB in green) within class-1 genomic islands and chromosomal background. Results of a GLMM and posthoc tests comparing coalescent times between inversion genotypes are in Supplementary Tables 5, 6. **P, Q, R.** Recombination rate inferred by *Pyrho* using five individuals of AA (blue), BB (green), and AB (red) samples at class-1 genomic islands. Note that low recombination rate in class-1 genomic islands inferred using the minor haplotype homozygotes (BB, green) for chromosomes 12 (**P**) and 30 (**R**) can occur even without BB-specific recombination suppression as revealed by simulations (**S-U**, Supplementary Fig. 14). **S, T, U.** Recombination inference around simulated polymorphic inversions with different additional recombination suppression. In model 1 (**S**), no recombination suppression besides between normal (“N”) and inverted (“I”) haplotypes was simulated. In model 2 (**T**), recombination was suppressed between two sequences of I haplotype as well as between N and I in the simulation. In model 3 (**U**), recombination was suppressed regardless of genotypes (NN, NI, II) in the simulation. Lines with three colours represent inferred recombination rate using NN, NI, and II samples. Description of the models is in Materials and Methods and Supplementary Table 7. Full results of recombination inference on simulated data with six models of recombination suppression are in Supplementary Fig. 14.

Coalescent times are known to distribute differently at genomic regions under selection (Charlesworth 2009; Guerrero et al. 2012; Fijarczyk and Babik 2015; Ellegren and Galtier 2016; Speidel et al. 2019; Hejase et al. 2020). To investigate the effects of different types of selection on coalescent time within an inversion, we performed forward-in-time simulations of polymorphic inversions using SLiM (Haller and Messer 2019). Specifically, we simulated a chromosome with a polymorphic inversion under nine conditions with three different fitness scenarios (neutrality, frequency-dependent selection, and overdominance) and three proportions of mutations with different fitness effects (neutral, deleterious, and mixed), and inferred coalescent times along the chromosome using one of the three genotypes at the inversion locus (normal/normal (NN), normal/inverted (NI), and inverted/inverted (II)) with MSMC2-decode (Schiffels and Durbin 2014) over multiple time points of simulations (Materials and Methods). Old polymorphic inversions maintained at low frequencies by balancing selection (both frequency-dependent and overdominance) showed longer coalescent time for NI and shorter coalescent time for II within the inversion compared to the chromosomal background (Supplementary Figs. 10, 11). Young inversions under neutrality and balancing selection exhibited similar patterns of coalescent within the inversion for NN and NI compared to the chromosomal background (Supplementary Figs. 10, 11). High proportion of deleterious mutations (i.e. purifying selection) resulted in short coalescent time regardless of the inversion genotype (Supplementary Figs. 10, 11). These simulations give us qualitative expectations of coalescent time within an inversion under scenarios with different selection pressures and ages compared to chromosomal background.

To characterise evolutionary histories with different types of selection in our blackcap inversions, we inferred the chromosomal distribution of coalescent time between pairs of sequences of the same and different haplotypes by MSMC2-decode. We used AA samples for coalescent between two sequences of the A haplotype, and BB samples for that of the B haplotype. We used AB samples for cross-haplotype coalescent between the A and B haplotypes. Consistent with our simulations, coalescent times for BB within for all class-1 genomic islands except chromosome 6 were shorter than the chromosomal background (Fig. 3M-O, Supplementary Fig. 12), and shorter than AA and AB (Fig. 3M-O, Supplementary Fig.

12, details in Supplementary Tables 5, 6). On chromosomes 28 and 30, coalescent times within class-1 genomic islands for AA and AB were not significantly different between each other as well as compared to the chromosomal background (Fig. 3O, Supplementary Fig. 12, details in Supplementary Table 6). On chromosome 12, the cross-haplotype coalescent times within class-1 genomic island for AB were longer than the chromosomal background (Fig. 3M, Supplementary Fig. 12, details in Supplementary Table 6). Coalescent times within the genomic islands on chromosomes 6 and 14 were shorter than the background for all three genotypes (Fig. 3N, Supplementary Fig. 12, details in Supplementary Table 6). These results suggest heterogeneity among the polymorphic inversions: the inversion on chromosome 12 was under balancing selection for long time; the inversions on chromosomes 6 and 14 were under background selection; and the inversions on chromosomes 28 and 30 have recent origins.

At an inversion locus, recombination is suppressed in heterozygotes (NI) but not in homozygotes (NN and II) (Wellenreuther and Bernatchez 2018). To investigate whether the presence of polymorphic inversions alone determines local recombination landscape in homo- and heterozygotes at class-1 genomic islands, we intended to infer recombination rates using AA, AB, and BB samples separately based on linkage disequilibrium (LD) patterns around the genomic islands. Before addressing this in blackcaps empirically, we first assessed how *Pyrho* (Spence and Song 2019), an LD-based inference of recombination landscape, performs at an inversion using samples with a certain inversion genotype. We simulated an inversion using *SLiM* under six scenarios listed in Supplementary Table 7, and inferred recombination rates using samples with a certain inversion genotype (NN, NI, and II) with *Pyrho*. The simulations revealed that inferred recombination rates using homozygotes of minor haplotype (II for models 1-3 and NN for models 4-6) were decreased in the inversion interval, even without additional genotype-specific recombination suppression (Supplementary Fig. 14A, G). The inferred recombination rates using the major haplotype homozygotes (NN for models 1-3 and II for models 4-6) were decreased only when recombination within them was explicitly suppressed (models 3 and 6, Supplementary Fig. 14E, I). Consistently, LD calculated using major haplotype homozygotes (NN for models 1-3 and II for models 4-6) was elevated only when recombination within the major haplotype was suppressed (Supplementary Fig. 13A vs I,

211 M vs Q). These simulations provide guides on how to interpret recombination rates at class-1  
212 genomic islands inferred using a certain inversion genotype: while low recombination rates  
213 inferred using minor haplotype homozygotes (BB) could happen even without recombination  
214 suppression in BB, the same pattern inferred using major haplotype homozygotes (AA) would  
215 indicate additional recombination suppression besides the presence of a polymorphic inversion.

216 To characterise inversion genotype-specific recombination landscape around class-1 ge-  
217 nomic islands, we applied **Pyrho** to our empirical data using each inversion genotype (AA,  
218 AB, and BB) separately. Recombination rate inferred from the AB samples was low within  
219 class-1 genomic islands on chromosomes 6, 12, 14, and 30, as well as to a lesser extent on  
220 chromosome 28 (Fig. 3P-R, Supplementary Fig. 16), supporting recombination suppression  
221 between arrangements. Recombination rate inferred using AA was at moderate levels within  
222 class-1 genomic islands on chromosomes 12 (Fig. 3P), and 28 (Supplementary Fig. 16),  
223 suggesting no recombination suppression in AA at these loci. Recombination rate inferred  
224 from BB samples was decreased in class-1 genomic islands on chromosomes 12 (Fig. 3P), 28  
225 (Supplementary Fig. 16), and 30 (Fig. 3R), consistent with the simulations, suggesting the  
226 effects of low inversion frequency on LD patterns. However, recombination rate inferred from  
227 AA samples was low within the class-1 genomic islands of chromosomes 6 (Supplementary Fig.  
228 16) and 14 (Fig. 3Q), suggesting additional recombination suppression besides suppression  
229 in inversion heterozygotes (Note that inference of recombination rate using BB samples in  
230 class-1 genomic islands on chromosomes 6 and 14 was not performed due to an insufficient  
231 number of samples). On chromosomes 6 and 14, the elevated LD in AA and all samples  
232 extended to the outside of boundaries of the class-1 genomic islands (Supplementary Fig. 15),  
233 indicating recombination suppression in a region containing the class-1 genomic islands on  
234 these two chromosomes. These empirical results, combined with our simulations, demonstrate  
235 heterogeneity of recombination suppression at class-1 genomic islands: while all class-1 genomic  
236 islands are under recombination suppression in heterozygotes (AB), class-1 genomic islands on  
237 chromosomes 6 and 14 are nested in additional recombination suppression.

## 238 Blackcap and zebra finch have recurrent polymorphic inversions at overlap- 239 ping genomic regions

240 To investigate phylogenetic relevance of the polymorphic inversions, we analysed synteny of  
241 the blackcap genome to a distant species zebra finch *Taeniopygia guttata*. The zebra finch  
242 is a passerine model species in which four polymorphic inversions had been identified and  
243 characterised (Knief et al. 2016). Unexpectedly, three of the five class-1 genomic islands in  
244 the blackcap on chromosomes 6, 12, and 14 overlapped with the inversions on zebra finch  
245 chromosomes 5, 11, and 13 (Fig. 4A, B).

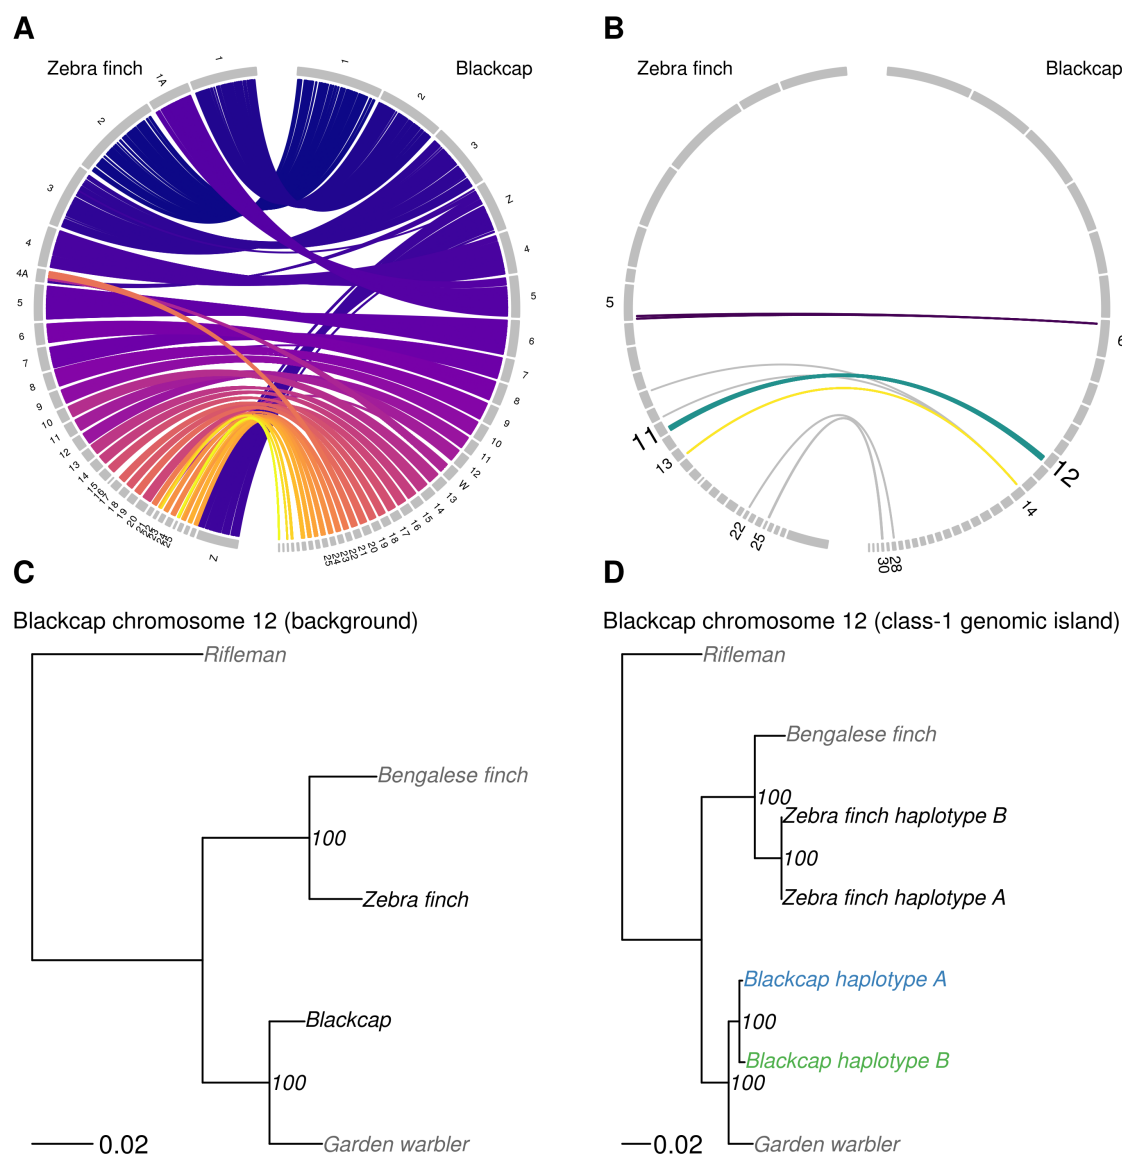

**Figure 4:** Synteny and phylogenetic analyses in class-1 genomic islands **A.** Circos plot showing synteny between blackcap and zebra finch genome assemblies. **B.** Circos plot showing synteny between class-1 genomic islands in the blackcap and zebra finch genome. Three coloured links show synteny links connecting the inversions in the blackcap with inversions known in the zebra finch. **C.** Maximum likelihood phylogenetic tree of the chromosomal background exemplified for blackcap chromosome 12 and orthologous chromosomes in the garden warbler, zebra finch, Bengalese finch, and rifleman. **D.** Maximum Likelihood phylogenetic tree of the class-1 genomic island using A and B haplotypes of blackcap chromosome 12 and zebra finch chromosome 11, and the orthologous reference genome sequences of the garden warbler, Bengalese finch, and rifleman. Values at nodes in panels C and D show bootstrap support (n=1,000).

246 For each of the three polymorphic inversions syntenic between blackcap and zebra finch,  
247 there are two possible evolutionary scenarios. The first scenario is that recurrent inversion



events occurred independently in two lineages at the overlapping genomic intervals. The second scenario is that an inversion event occurred in the common ancestor between blackcaps and zebra finches, and both ancestral and inverted arrangements were maintained in the two lineages. In other words, overlapping polymorphic inversions evolved repeatedly in the two lineages under the first scenario, while an old orthologous inversion has been maintained in the two lineages under the second scenario. To distinguish between these two scenarios for each of the three loci, we constructed maximum likelihood phylogenetic trees from the consensus sequences of the two haplotypes in the blackcap and zebra finch, along with other related species. We generated consensus sequences of the A and B haplotypes in the blackcap and zebra finch using reference genome assemblies and SNP data (blackcap with our own data set and zebra finch with a published data set from Singhal et al. (2015)). We focused on class-1 genomic islands on blackcap chromosomes 6 and 12 and excluded chromosome 14 because the zebra finch data set lacked SNPs within the genomic regions syntenic to class-1 genomic island of the blackcap chromosome 14. For maximum likelihood phylogenetic inferences, we included garden warbler and Bengalese finch *Lonchura striata* as sister groups of blackcap and zebra finch, and rifleman *Acanthisitta chloris* as the outgroup for the four species. On both phylogenies for the two class-1 genomic islands, the two haplotypes of the same species were clustered next to each other (Fig. 4D, Supplementary Fig. 18), consistent with the species tree constructed from the other part of the same chromosome (Fig. 4C, Supplementary Fig. 18). These results suggest that recurrent inversions at the overlapping genomic regions occurred independently in the two lineages.

## **Selection against gene flow with potential effects of population-specific sweeps at a class-2 genomic island**

One genomic island of deviated relatedness pattern on chromosome 21 was classified as class-2 (Fig. 1F, Table 1). On the PCA performed in this genomic island, samples from two populations (Azores and Cape Verde) were diverged from all the other populations (Fig. 1F, Fig. 5F). Multiple possible evolutionary processes could lead to this pattern: introgression from a distant lineage to these two populations, population-specific selective sweeps, or differentiation by selection against gene flow. We ran **VolcanoFinder** and found no evidence for introgression in

277 the class-2 genomic island (Supplementary Fig. 19).

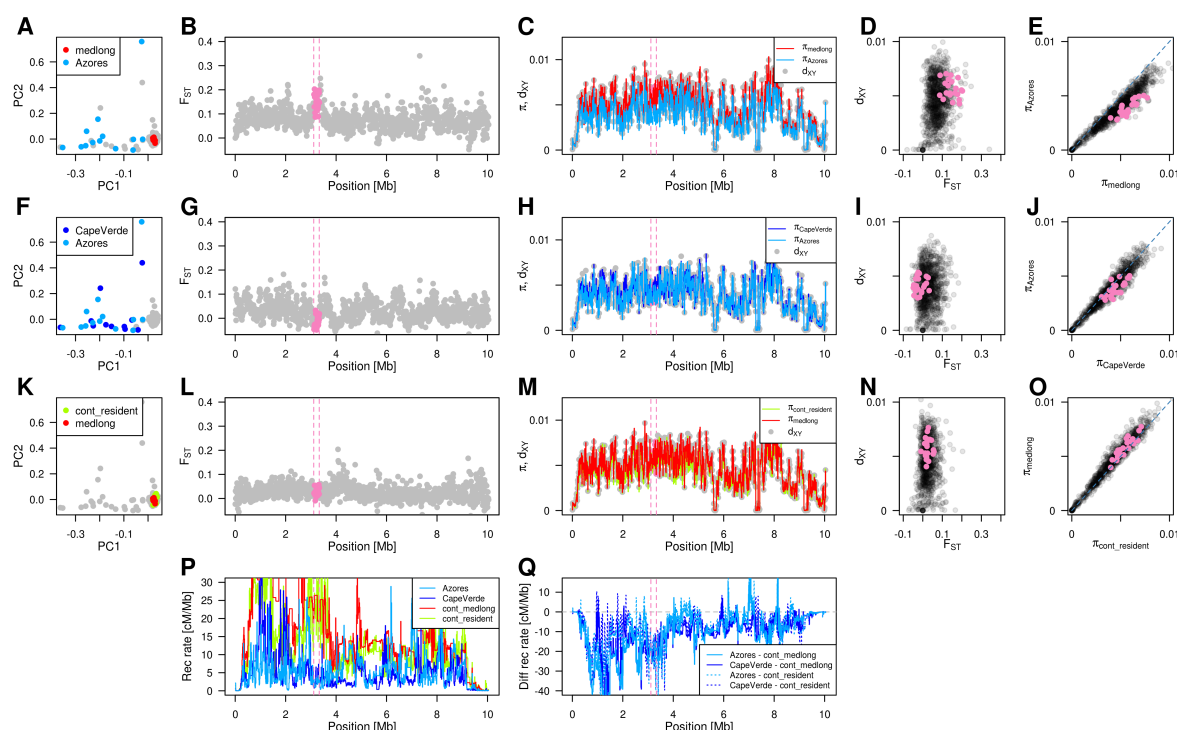

**Figure 5:** Selection against gene flow by variation in recombination landscape among populations at a class-2 genomic island. **A-E.** Differentiation analyses between group 1 and group 2. **F-J.** Differentiation analyses within group 1. **K-O.** Differentiation analyses within group 2. **A, F, K.** PCA showing the local relatedness pattern at the class-2 genomic island. Individuals from two focal populations for a given row are highlighted with colours used in Fig. 1H. **B, G, L.**  $F_{ST}$  between the two populations highlighted in the PCA. **C, H, M.**  $d_{XY}$  between the two populations highlighted in the PCA and  $\pi$  for each population. **D, I, N.** Relationship between  $F_{ST}$  and  $d_{XY}$ . Pink and black points represent windows within and outside the class-2 genomic island. **E, J, O.** Relationship between  $\pi$  of genomic windows between two populations. If  $\pi$  in the two populations are equal (i.e.  $\Delta\pi = 0$ ), windows should be distributed along the blue dotted line. **P.** Recombination rate along chromosome 21 in Azores, Cape Verde, and medium-long distance migrant and continental resident populations. **Q.** Difference in recombination rate of Azores and Cape Verde populations compared to medium-long distance migrant and continental resident populations. Results of permutation tests of  $\pi$ ,  $F_{ST}$ ,  $d_{XY}$ , and  $\Delta\pi$  comparing within and outside the class-2 genomic island are in Supplementary Tables 8, 9.

278 Although both population-specific selective sweep and selection against gene flow are  
279 often associated with elevated  $F_{ST}$  between two populations, they leave different patterns of  
280 other summary statistics such as  $\pi$  and  $d_{XY}$  (Hejase et al. 2020). While a population-specific  
281 sweep is expected to lower  $\pi$  for the population with the sweep making  $\Delta\pi$  (difference of  $\pi$   
282 between the two populations) greater than their chromosomal background, selection against  
283 gene flow is not expected to lower  $\pi$ , leaving  $\Delta\pi$  the same level as the chromosomal background.  
284  $d_{XY}$ , on the other hand, should be elevated with selection against gene flow, but not with the

population-specific sweep. In addition, because variation in recombination rate is negatively correlated with admixture proportion (Martin et al. 2019), low recombination rate is expected for selection against gene flow. To determine which of these scenarios better explains the deviated relatedness patterns at the class-2 genomic island, we calculated  $F_{ST}$ ,  $d_{XY}$  and  $\pi$  in a 10-kb sliding window between two groups (group 1: Azores and Cape Verde; and group 2: medium-long distance migrant (represented by Belgium) and continental resident (represented by Cazalla de la Sierra, Spain)), and within each group (Azores vs Cape Verde and medium-long distance migrant vs continental resident). In addition, we inferred recombination landscape along chromosome 21 for medium-long distance migrant, continental resident, Azores, and Cape Verde populations respectively, using *Pyrho*. The scenario with selection against gene flow was supported by elevated  $F_{ST}$  and  $d_{XY}$  in the class-2 genomic island in all four pairwise analyses between the two groups (Azores vs medium-long distance migrants (Fig. 5B-D), other pairs in Supplementary Fig. 20). Lower recombination rate within the class-2 genomic island in Azores and Cape Verde compared to medium-long distance migrant and continental resident populations (Fig. 5P, Q) was also consistent with the scenario with selection against gene flow in the Azores and Cape Verde populations. However,  $\Delta\pi$  between the two groups were significantly greater than chromosomal background (Fig. 5C, E, Supplementary Fig. 20C, E, Supplementary Table 9), supporting the population-specific sweep scenario (Note, however, that  $\pi$  in the class-2 genomic island was not significantly lower than chromosomal background in all populations Supplementary Table 9). These results indicate that selection against gene flow by reduced recombination in Azores and Cape Verde populations is responsible for the deviated local relatedness pattern in the class-2 genomic island of chromosome 21, potentially with additional effects by weak population-specific sweeps.

### **Class-3 genomic islands experienced linked selection in conserved and non-conserved recombination cold-spots**

17 genomic islands of deviated relatedness patterns were classified as class-3 (Supplementary Fig. 3A-F, H-L, N, P-T, Table 1). In these genomic islands, patterns of PCA results were less clear than for class-1 and class-2 genomic islands (Supplementary Fig. 3). Consistently, the ratio between the eigenvalues of the PC1 and PC2 for class-3 genomic islands were lower than

that of class-1 genomic islands (Supplementary Fig. 4). The exceptionally high read depth in parts of class-3 genomic islands (Supplementary Fig. 21) prompted us to hypothesise their association with repetitive elements. Our resequencing strategy took advantage of Illumina short reads, which are known to be unsuited to genotype repeats (Weissensteiner and Suh 2019). Therefore, we first focused on analysing the VGP reference genome assembly.

We investigated whether certain types of repeats are co-localised with class-3 genomic islands along the assembly, instead of characterising the variation in the repeat among samples. We found 18,671 tandem repeats (TRs) with repeat unit sizes between 10 and 500 bp. By counting the number of repeats by stepwise ranges of repeat unit size in a 10-kb sliding window, we found TRs with large (>150 bp) unit size co-localised with 11 of the 17 class-3 genomic islands or the adjacent regions especially on long chromosomes (chromosomes 1, 2, 3, Z, 5, 7, 8, 9, 10, 13, and 16 (Fig. 6A, B, Supplementary Fig. 22)), as well as two class-1 genomic islands (chromosomes 6 and 14 (Supplementary Fig. 22)). On the other six chromosomes most of which are short (“microchromosomes” 11, 15, 17, 18, 20, 27), such co-localisation between TRs and class-3 genomic islands was not detected (Fig. 6C, F, Supplementary Fig. 22). To determine whether there are many different TRs (with unique consensus monomer sequences) repeated only few times for each or there are a few unique TRs repeated many times, we listed six TRs with the longest unit sizes in a chromosome and mapped the chromosomal positions and repeat counts of these six TRs (Fig. 6D-F, Supplementary Fig. 23). In most cases, a few TRs with long unit size were repeated tens to hundreds of times within or next to class-3 genomic islands (Fig. 6D, E, Supplementary Fig. 23). These results suggest that the 11 class-3 genomic islands of large chromosomes are associated with relatively long TRs.

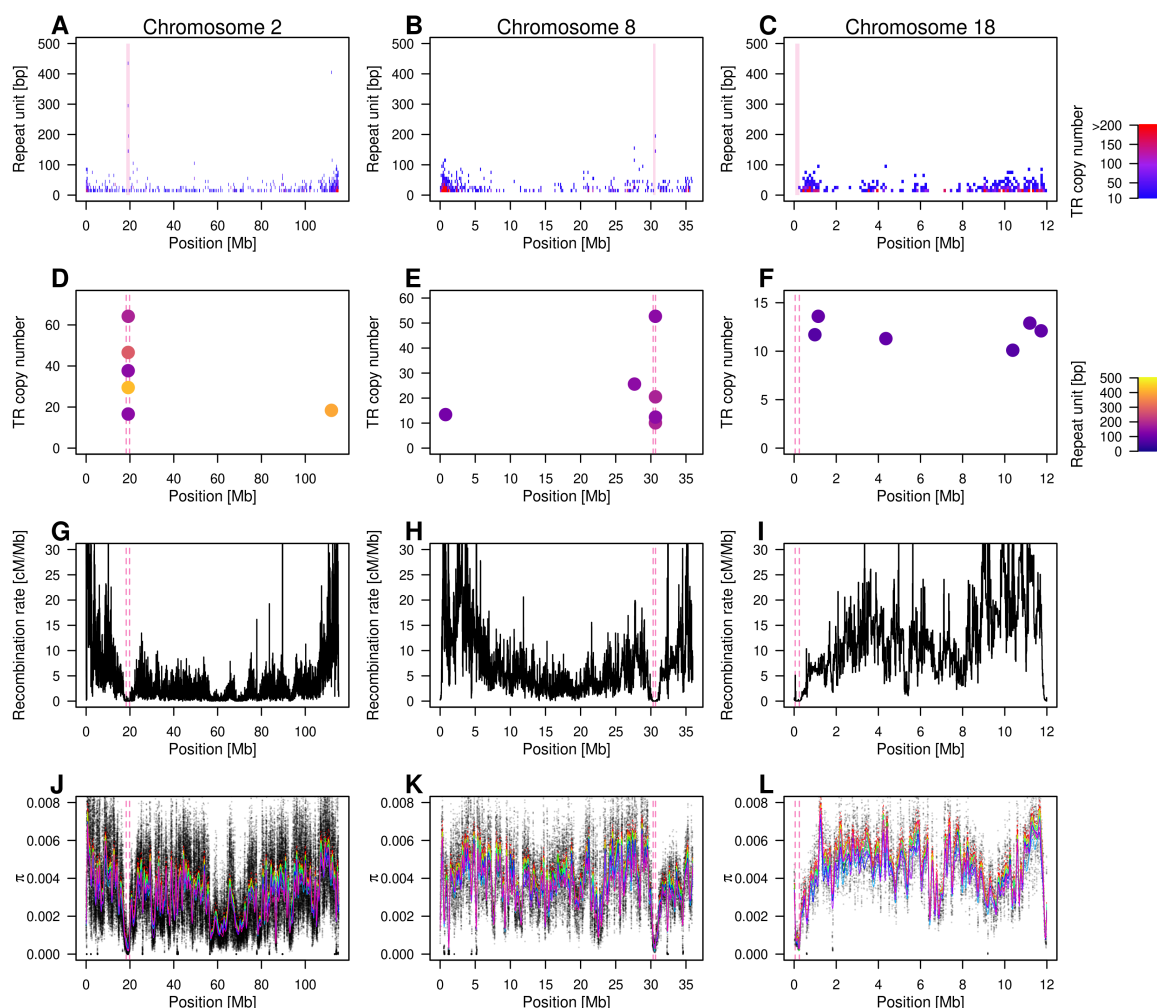

**Figure 6:** Class-3 genomic islands exemplified for chromosomes 2, 8, and 18. **A-C.** Heat maps showing distribution of repeat unit size and total number of repeats of TRs in 10-kb genomic windows. There are TRs with unit size greater than 150 bp at class-3 genomic islands on chromosomes 2 and 8 (**A, B**), but not on chromosome 18 (**C**). **D-F.** Genomic positions and copy numbers of unique TRs with the six longest unit for each chromosome. On chromosomes 2 and 8 (**D, E**), there are five and two unique TRs with long repeat units co-localised with class-3 genomic islands but not on chromosome 18 (**C**). Colours of the data points represent unit sizes of the six unique TRs. **G-I.** Recombination landscape along chromosomes. Recombination is suppressed in all the three exemplified class-3 genomic islands. **J-L.** Nucleotide diversity ( $\pi$ ) along the exemplified chromosomes. Coloured lines show smooth spline of  $\pi$  for each population corresponding to Fig. 1H, except for a subset of medium-long distance migrants (Georgian) represented separately with red dotted lines because of population sub-structure revealed by whole-genome PCA (Supplementary Fig. 1).  $\pi$  is reduced in class-3 genomic islands in all populations. Pink areas (**A-C**) and dotted lines (**D-L**) show the positions of class-3 genomic islands.

Centromeres and peri-centromeric regions are good candidates for a genomic feature underlying deviated local relatedness patterns at the 11 class-3 genomic islands with TRs (Melters et al. 2013; Hartley and O'Neill 2019; Weissensteiner and Suh 2019). In addition to the presence of a few TRs repeated many times in the 11 class-3 genomic islands, all of

340 them are the only genomic island of deviated relatedness patterns in a chromosome, consistent  
 341 with the possibility that centromeres may be involved in class-3 genomic islands. To further  
 342 test this possibility, we inferred recombination landscape along the blackcap genome, because  
 343 recombination is known to be suppressed at centromeres. At most class-3 genomic islands with  
 344 long TRs, we found that recombination was suppressed (Fig. 6G, H, Supplementary Fig. 25).  
 345 However, recombination was also suppressed in class-3 genomic islands where we did not find  
 346 TRs with long unit sizes (e.g chromosome 18 (Fig. 6I)), indicating suppressed recombination  
 347 (including that of (peri)centromeric regions) may be the factor associated with class-3 genomic  
 348 islands instead of presence of centromeres *per se*.

349 To investigate whether the PCA results for class-3 genomic islands reflect true deviation of  
 350 local relatedness patterns or they are deviated by technical (i.e. bioinformatic) effects owing to  
 351 the presence of TRs in the reference, we compared the PCA results with and without masking  
 352 TRs. Masking TRs did not change PCA results (Supplementary Figs. 3, 24), indicating  
 353 the deviation of local relatedness patterns in class-3 genomic islands is indirect effects of  
 354 recombination suppression (such as linked selection) rather than due to technical effects by  
 355 the presence of TRs.

356 Having ruled out the possibility that local relatedness patterns are directly affected by  
 357 the presence of TRs in class-3 genomic islands on the reference, we then calculated nucleotide  
 358 diversity ( $\pi$ ) for each population to decipher which type of linked selection may be able to  
 359 explain the observed patterns of local relatedness. The same degree of decrease in  $\pi$  in all  
 360 populations irrespective of the distinct demography among blackcap populations (Delmore  
 361 et al. 2020) is expected for a scenario with long-term population-non-specific background  
 362 selection, whereas decrease in  $\pi$  in only a subset of populations is expected for (population-  
 363 specific) sweeps (Burri 2017).  $\pi$  was decreased similarly in class-3 genomic islands for all  
 364 populations (Fig. 6J-L, Supplementary Fig. 26), suggesting that background selection deviates  
 365 local relatedness patterns in class-3 genomic islands. As was the case for recombination  
 366 suppression,  $\pi$  was decreased not only at putative centromeric regions with long TRs (Fig. 6J,  
 367 K) but also in class-3 genomic islands without long TRs (Fig. 6L). Together, these results  
 368 suggest that class-3 genomic islands of deviated local relatedness patterns are associated with

369 population-non-specific long-term background selection where recombination is suppressed.  
 370 Tandem repeats with long repeat unit sizes were found in many of them probably because  
 371 centromeres are major recombination cold-spots in the genome.

372 To investigate whether class-3 genomic islands of the blackcap represent evolutionarily  
 373 conserved recombination cold-spots, we inferred the recombination landscape of the closest  
 374 sister species garden warbler using *Pyrho*, and compared recombination rates between the  
 375 two species in 50 kb sliding windows for 16 autosomes with class-3 genomic islands. Eight  
 376 class-3 genomic islands of blackcap autosomes (chromosomes 1 (Fig. 7C), 2, 11, 15, 16, 17, 20)  
 377 were in apparent recombination cold-spots in garden warblers (i.e. “conserved” recombination  
 378 cold-spots), while recombination suppression in all or some windows within the other nine  
 379 class-3 genomic islands (chromosomes 3, 4, 5, 7, 8, 9, 10, 13, 18) was not conserved between  
 380 the two species (Fig. 7A, B, Supplementary Fig. 27). This result suggests class-3 genomic  
 381 islands consist of evolutionarily heterogeneous recombination cold-spots (i.e. conserved and  
 382 non-conserved cold-spots). The presence of conserved recombination cold-spots is in line with  
 383 population-non-specific long-term background selection at class-3 genomic islands. Meanwhile,  
 384 the presence of non-conserved recombination cold-spots indicates that their relatedness patterns  
 385 may be less stable and subject to other types of selection such as population-specific linked  
 386 selection.



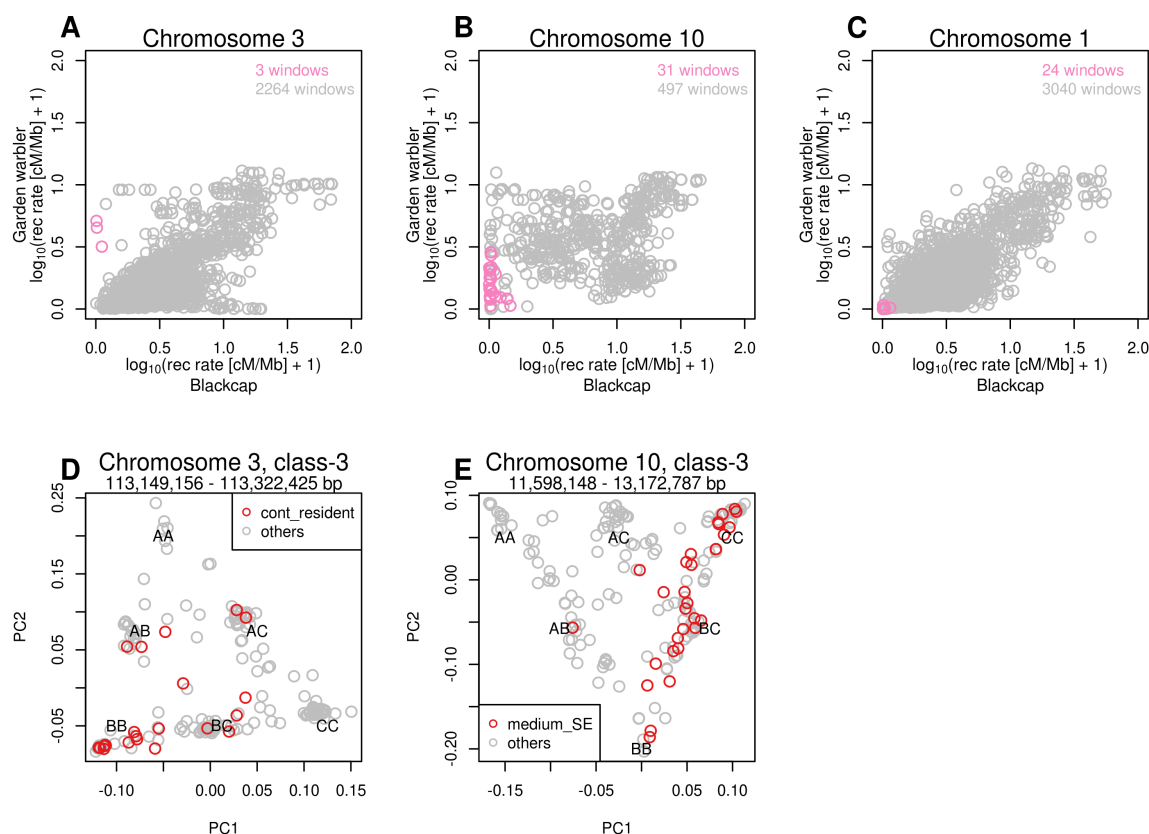

**Figure 7:** Population-specific selection at class-3 genomic islands in non-conserved recombination cold-spots **A, B.** Recombination rate in 50 kb windows on chromosomes 3 and 10. Each data point depicts a 50 kb window. Note that windows in class-3 genomic islands (pink data points) are in non-conserved recombination cold-spots (recombination rate greater than 0 in garden warbler). **C.** Recombination rate in 50 kb windows on chromosome 1. Note that windows in class-3 genomic island (pink data points) are in conserved recombination cold-spots (suppressed recombination in garden warbler). **D, E.** PCA in class-3 genomic islands on chromosomes 3 and 10 showing local relatedness patterns. Each data point represents a blackcap individual, with red corresponding to individuals from the population that experienced population-specific selection in the focal genomic regions identified in Delmore et al. (2020).

In blackcaps, Delmore et al. (2020) previously identified genomic regions associated with variation in migratory phenotypes among populations. To investigate potential roles of population-specific selection associated with migratory phenotypes in non-conserved recombination cold-spots within class-3 genomic islands, we compared the positions of genomic islands that we found in this study with the results of Delmore et al. (2020). Two genomic islands of deviated local relatedness patterns (class-3 genomic islands on chromosomes 3 and 10 in non-conserved recombination cold-spots (Fig. 7A, B)) overlapped with two loci identified



in Delmore et al. (2020) (Super-Scaffolds 99 and 22) as genomic regions under selection in continental residents and medium distance southeast migrants, respectively. Because these two class-3 genomic islands have local relatedness patterns with triangular spread of samples on PCA (Supplementary Fig. 3C, K), we assumed that there are three non-recombining haplotypes (triallelic model, Supplementary Fig. 28A, Ruiz-Arenas et al. (2019)) for each genomic island. As expected from Delmore et al. (2020), the continental residents and medium distance southeast migrants were distributed in a biased manner in the PC1-PC2 space (Fig. 7D, E). In the genomic island on chromosome 3, one haplotype (haplotype “B” in Fig. 7D) was more frequent in the continental residents than in populations with other migratory phenotypes, suggesting selection for this haplotype in this population. On the contrary, in the genomic island on chromosome 10, two haplotypes (“B” and “C” in Fig. 7E) were both equally frequent in the medium distance southeast migrants, with few individuals with the A haplotype (Fig. 7E), which could be explained by selection against haplotype A in the medium distance southeast migrants. These results are in line with the potential contributions of non-conserved recombination cold-spots to deviate local relatedness patterns through migratory phenotype-specific linked selection.

## Discussion

Here, we characterised the heterogeneous genomic architecture of local relatedness in the blackcap. The identified genomic islands of deviated relatedness patterns are associated with polymorphic inversions, selection against gene flow, and different types of linked selection as well as recombination suppression.

### Balancing and background selection at polymorphic inversion loci

One polymorphic inversion on chromosome 12 was maintained by balancing selection over a long evolutionary time span. There are multiple cases in which polymorphic inversions are associated with large (and often discrete) physiological, morphological, and behavioural polymorphism under balancing selection, such as the social chromosome in fire ants (Pracana et al. 2017; Huang et al. 2018), mating system, aggressiveness and plumage polymorphism

in the male ruff (Küpper et al. 2015; Lamichhaney et al. 2015) and white-throated sparrow (Horton et al. 2014; Tuttle et al. 2016; Merritt et al. 2020), sperm motility in the zebra finch (Kim et al. 2017; Knief et al. 2017), and local adaptation in the sunflower (Huang et al. 2020; Todesco et al. 2020). Alternatively, introgressed inversions under balancing selection can also have large divergence and long cross-haplotype coalescent time, as well as suppressed recombination between the two haplotypes. For instance, a “supergene” associated with wing pattern mimicry in the butterfly *Heliconius numata* arose by an introgressed inversion from a distant lineage which had diverged for more than a million years (Jay et al. 2018). However, this scenario is unlikely to explain the polymorphic inversion that we identified in the blackcap on chromosome 12, because the phylogenetic distance between the two haplotypes is not comparable to that of between the blackcap and its closest sister species.

Two other inversions nested within recombination cold-spots on chromosomes 6 and 14 in the blackcap are under background selection. These two inversions co-localise with putative centromeres, suggesting they may be pericentric inversions. The effects of purifying selection on realised genetic variation depend on recombination rate (Hudson and Kaplan 1995), thus the reduced nucleotide diversity and coalescent time in these inversions can be well explained by recombination suppression at the centromeres. Despite the effect of background selection, the presence of polymorphic inversions in these regions is the main determinant of local relatedness patterns in which individuals are clustered according to their inversion genotypes. Interaction between background selection and a polymorphic inversion on local relatedness pattern over time (i.e. how a class-3 genomic island transits to a class-1 genomic island by a novel inversion) should be studied further by simulations.

The three inversions in the blackcap discussed above are syntenic to polymorphic inversions that have been independently identified in the zebra finch (Knief et al. 2016). To our knowledge, this is the first example of convergence of polymorphic inversions at overlapping genomic regions. There are cases of convergent evolution of functionally analogous chromosomes (or chromosomal segments) by structural variations such as sex chromosomes in animals and fungi (Fraser et al. 2004) and social chromosomes in fire ants (Purcell et al. 2014), but they involve structural variation on different chromosomes. These loci are associated with variation in

several morphological traits in the zebra finch (Knief et al. 2016). Because the exact functions and fitness effects of these inversions in the blackcap are unclear, more detailed genetic and phenotypic analyses are needed, as well as more detailed characterisation of the inversion breakpoints. How general the convergence of polymorphic inversions is and its effects on local ancestries should be further studied with population genomics in other species covering a more complete phylogenetic context.

The inversions on chromosomes 28 and 30 are younger than the three loci discussed above. On chromosome 28, the absence of LD and genetic differentiation between the two arrangements around the locus seems paradoxical given the observed local relatedness pattern in which samples are clustered into three groups. One possible explanation could be subtle levels of recombination and/or gene conversion between the arrangements on chromosome 28, which might cause the observed differences in differentiation and LD patterns between the two loci on chromosomes 28 and 30. Population genetic analyses using phased data will provide more detailed insights on haplotype structure in these loci.

## **Selection against gene flow with potential effects of a sweep**

One genomic island on chromosome 21 is under selection against gene flow by reduced recombination rates in the Azores and Cape Verde populations. Genetic variation in this genomic region is slightly lower compared to the chromosomal background, leaving the possibility of additional effects of a population-specific sweep. There are examples in which genomic regions with selection against gene flow also experience population-specific sweeps (e.g. Hejase et al. 2020, note though that in this example genomic patterns supporting these two scenarios were present in different populations). It is important to realise that similar pattern can also arise without population-specific sweeps in populations under isolation and/or selection against gene flow: stochasticity in fixation time in two populations can cause transient loss of genetic variation in only one population which can be mistaken as a signal of population-specific sweeps by local adaptation (Booker et al. 2021).

The small effect of a population-specific sweep, if any, may indicate that the sweep is partial and/or soft. Recent empirical studies suggest positive selection on standing genetic

variation is common in early stages of the speciation continuum, leaving signatures of partial and soft sweeps along the genome (Delmore et al. 2018; Hejase et al. 2020). However, the possibility of population-specific sweeps should be considered with caution in the blackcap, because effects of variation in recombination landscape among populations on local genealogy have not been well studied yet. In addition, the Macaronesian island populations including Azores and Cape Verde experienced a reduction in effective population size after the population split from continental populations (Delmore et al. 2020), thus the inference of the effects of differentiation and sweeps should take population-specific demography into account. Identifying under which conditions relatedness patterns of class-2 genomic islands evolve requires not only empirical analyses but also simulations of a particular demography corroborating recombination landscape varying among populations, hard and soft selective sweeps, and selection against gene flow.

## **Linked selection at conserved and non-conserved recombination cold-spots**

Recombination suppression and decreased nucleotide diversity overlapping with 17 class-3 genomic islands reflects the effect of population-non-specific long-term background selection on deviated local relatedness patterns, consistent with earlier work (Li and Ralph 2019). 11 of these regions contain putative (peri)centromeres and the other six had exceptionally high read depth without overlap with TRs, suggesting association with either other types of repeats or the absence of repeat variant in the reference assembly.

In population genomics, barrier loci against gene flow, and genes under local adaptation and parallel selection have been sought using summary statistics such as  $F_{ST}$  and cluster separation score (CSS) that rely on realised relatedness patterns (e.g. Irwin et al. 2018; Jones et al. 2012; Malinsky et al. 2015). However, it has also been pointed out that linked selection at recombination cold-spots can increase signals of these summary statistics by reduced absolute genetic diversity (Noor and Bennett 2009; Renaut et al. 2013; Cruickshank and Hahn 2014). In birds, the recombination landscape along the genome is relatively conserved across species (Singhal et al. 2015; Vijay et al. 2017). This facilitates long term effects of stable recombination cold-spots on deviated relatedness patterns at the same genomic regions

in multiple populations and species (Burri 2017; Vijay et al. 2017). We interpreted the reduced nucleotide diversity to similar levels in all blackcap populations at recombination cold-spots as support for background selection (hitchhiking effects by purifying/negative selection on linked neutral variations) instead of selective sweeps (hitchhiking effects by positive selection on linked neutral variations), because it is unlikely that recurrent sweeps in populations with different effective population sizes result in the same level of reduced nucleotide diversity. The fact that many of class-3 genomic islands contain putative (peri)centromeric regions is consistent with reduced genetic diversity at (peri)centromeric regions observed in other species (Branca et al. 2011; Roesti et al. 2013; Delmore et al. 2015; Vijay et al. 2017), indicative for a general process with repeatable consequences. Our finding that more than half class-3 genomic islands are recombination cold-spots conserved between blackcaps and garden warblers also supports the effect of stable cold-spots on deviated relatedness patterns through long-term background selection. The lack of conservation of recombination suppression in the other seven class-3 genomic islands also indicates evolutionary heterogeneity of factors that deviate local ancestries.

Despite the relevance, we attempted neither to identify repetitive elements based on the resequence data nor to perform population genetic analyses on variation in the repetitive elements, because short-read sequencing that we used for resequencing is not suited for repetitive sequence analyses. Population genomics with repeat variants in addition to SNP-based analyses has become an option with the development of long-reads sequencing (Weissensteiner and Suh 2019; Weissensteiner et al. 2020), and should facilitate further investigations on the repetitive elements landscape in class-3 genomic islands.

Some class-3 genomic islands with deviated relatedness patterns (on chromosomes 3, 10, 17, and 18) have a triangular spread of samples on the PC1-PC2 space. This pattern could be explained by assuming presence of several non-recombining haplotypes at these regions (Ruiz-Arenas et al. 2019), which is in line with background selection at recombination cold-spots. In diploid species, genetic relatedness among samples at a site with three non-recombining haplotypes (A, B, C) can be represented on a 2D space as a triangular spread of samples (Supplementary Fig. 28). Specifically, homozygous samples (AA, BB, and CC) are clustered

at the three nodes and heterozygotes (AB, BC, and AC) at the midpoints of the three edges of the triangle. If mutations and gene conversions (and possibly rare recombinations) are introduced, the spread for each genotype should widen, resulting in a triangular spread of samples as a whole on a 2D space, which is similar to the pattern we find in the four genomic islands.

We applied this perspective to interpret local relatedness patterns in two class-3 genomic islands on chromosomes 3 and 10 in non-conserved recombination cold-spots that overlap with results of Delmore et al. (2020), revealing evidence for migration phenotype-specific selection for and against one haplotype in the class-3 genomic islands on chromosomes 3 and 10. These genomic islands show reduced nucleotide diversity in all populations, suggesting the migration phenotype-specific selection having overlaid effects with general long-term background selection.

## Conclusion

Overall, we revealed a heterogeneous genomic architecture of local ancestries in the Eurasian blackcap, an iconic migratory songbird. Deviated local ancestries are associated with recombination suppression, yet the mode of recombination suppression did vary. In many genomic regions with deviated local ancestries, recombination is stably suppressed irrespective of genotypes (inversions at class-1 genomic islands on chromosomes 6 and 14) and across species (conserved cold-spots in class-3 genomic islands), while some others show recombination suppression/reduction only in certain genotype (inversion heterozygotes in class-1 genomic islands on chromosomes 12, 28, 30), populations (class-2 genomic island), and species (non-conserved cold-spots in class-3 genomic islands). The evolutionary time scales and types of selection deviating local ancestries are also diverse, ranging from long-term background selection irrespective of populations or genotypes, positive and negative selection in populations with certain migratory phenotypes, and selection against gene flow, to balancing selection between inversion genotypes. In addition, not all recombination cold-spots coincide with deviated local ancestries, leaving it unclear under which conditions deviated local ancestries evolve. Simulations with diverse scenarios as well as detailed functional analyses of genes within these

genomic islands will be the key to disentangling the evolution of such a genomic architecture. Our findings in the blackcap have provided insights into the genomic architecture of deviated local ancestries in a wild bird species that is a powerful system to study evolution of migratory behaviour. Such systems will be invaluable in determining general patterns of heterogeneous genomic evolution as well as their roles in evolution of complex behavioural traits that are difficult to address in classical model species.

## Materials and Methods

### *de novo* genome assembly

The *de novo* assembly of a chromosome-level blackcap reference genome was done with the Vertebrate Genomes Project pipeline v1.5 (Rhie et al. 2021). In brief, blood of a female from the non-migrant Tarifa, Spain population, was collected in 100% ethanol on ice and stored at -80°C (NCBI BioSample accession SAMN12369542). We chose a female in order to assemble both Z and W sex chromosomes.

The ethanol supernatant was removed and the blood pellet was resuspended in Bionano Cell Buffer in a 1:2 dilution. Ultra-long high molecular weight (HMW) DNA was isolated using Bionano agarose plug method, Bionano Frozen Whole Nucleated Blood Stored in Ethanol – DNA Isolation Guidelines (document number 30033) using the Bionano Prep Blood and Cell Culture DNA Isolation Kit. Four DNA extractions were performed yielding a total of 13.5 µg HMW DNA.

About 6 µg of DNA was sheared using a 26G blunt end needle (Pacbio protocol PN 101-181-000 Version 05) to ~40 kb fragments. A large-insert Pacbio library was prepared using the Pacific Biosciences Express Template Prep Kit v1.0 following the manufacturer protocol. The library was then size selected (>15 kb) using the Sage Science BluePippin Size-Selection System. Sequencing was performed on a PacBio Sequel I instrument, in Continuous Long-Read (CLR) mode. The library was then sequenced on 8 PacBio 1M v3 smrtcells on the Sequel instrument with the sequencing kit 3.0 and 10 hours movie with 2 hours pre-extension time, yielding 77.51 Gb of data (~66.29X coverage) with N50 read length averaging around 22,927

590 bp.

591 We used the unfragmented HMW DNA to generate a linked-reads library on the 10X  
592 Genomics Chromium (Genome Library Kit & Gel Bead Kit v2 , Genome Chip Kit v2 , i7  
593 Multiplex Kit PN-120262). We sequenced this 10X library on an Illumina Novaseq S4 150bp  
594 PE lane to ~60X coverage.

595 Unfragmented HMW HMW DNA was also used for Bionano Genomics optical mapping.  
596 Briefly, DNA was labeled using the Bionano Prep Direct Label and Stain (DLS) Protocol  
597 (30206E) and run on one Saphyr instrument chip flowcell. 136.31 Gb of data was generated  
598 (N50 = 301.9kb with a label density = 16.91 labels/100kb). Optical maps were assembled using  
599 Bionano Access, N50 = 27.48 Mb and total length = 1.41 Gb. Hi-C libraries were generated by  
600 Arima Genomics (<https://arimagenomics.com/>), Dovetail Genomics and sequenced on HiSeq  
601 X at ~60X coverage following the manufacturer's protocols. Arima Hi-C proximally ligated  
602 DNA was produced using the Arima-HiC kit v1 , sheared and size selected (200 – 600 bp) with  
603 SRI beads, and fragments containing proximity-ligated DNA were enriched using streptavidin  
604 beads. A final Illumina library was prepared using the KAPA Hyper Prep kit following the  
605 manufacturer guidelines. FALCON v1.9.0 and FALCON unzip v1.0.6 were used to generate  
606 haplotype phased contigs, and purge\_haplotigs v1.0.3 used to further sort out haplotypes  
607 (Guan et al. 2020). The phased contigs were first scaffolded with 10X Genomics linked reads  
608 using scaff10X 4.1.0 software, followed with Bionano Genomics optical maps using Bionano  
609 Solve single enzyme DLS 3.2.1, and Arima Genomics in-vitro cross-linked Hi-C maps using  
610 Salsa Hi-C 2.2 software (Ghurye et al. 2019). Base call errors were fixed using Arrow software  
611 with Pacbio long reads and Freebayes software with Illumina short reads. Manual curation was  
612 conducted using gEVAL software by the Sanger Institute Curation team (Howe et al. 2021).  
613 Curation identified 33 autosomes and Z and W chromosomes (plus 1 unlocalised). Autosomes  
614 were named in decreasing order of size. The total length of the primary haplotype assembly  
615 was 1,066,786,587 bp, with 99.14% assigned to chromosomes. There are a total of 601 contigs  
616 in 189 scaffolds, with a contig N50 of 7.4 Mb, and scaffold N50 of 73 Mb. The primary and  
617 alternate haplotype assemblies can be found under NCBI BioProject PRJNA558064, accession  
618 numbers GCA\_009819655.1 and GCA\_009819715.1.



## Whole-genome resequencing

We resequenced 179 blackcaps, five garden warblers, and three African hill babblers (Supplementary Table 1), of which 110 blackcaps, all garden warblers and African hill babblers were already published in Delmore et al. (2020) (details in Supplementary Table 1). Blood samples were collected from the brachial vein and stored in 100% ethanol. High molecular weight genomic DNA was extracted with a standard salt extraction protocol or through the Nanobind CBB Big DNA Kit – Beta following the manufacturer’s instructions. Libraries for short insert fragments between 300 and 500 bp were prepared and were then sequenced for short paired-end reads on either Illumina NextSeq 500, HiSeq 4000 or NovaSeq 5000 (Supplementary Table 1).

We performed quality control of the reads with FastQC version 0.11.8 ([https://www.bioinformatics.babraham](https://www.bioinformatics.babraham.ac.uk/projects/fastqc/)). Reads from all samples were mapped against the reference genome following an adjusted pipeline of Genome Analysis Toolkit (GATK version 4.1.7.0, McKenna et al. (2010)) and Picard version 2.21.9 (<http://broadinstitute.github.io/picard/>). After resetting the base quality of adapter bases in the sequenced reads to 2 with Picard MarkIlluminaAdapters, paired-end reads were mapped to the reference using BWA mem (Li 2013). To ensure that both unmapped mates and secondary/supplementary reads were marked for duplicates, we provided the reads as query sorted when Picard MarkDuplicates was run with the default pixel distance of 100 for reads from Illumina NextSeq 500 or with a pixel distance of 2,500 for reads from HiSeq 4000 and NovaSeq 5000. Due to low coverages, 10 samples (Supplementary Table 1) were sequenced multiple times. Alignment files for these samples (in BAM format) were merged with Picard MergeSamFiles. Per-sample quality control of BAM files using QualiMap version 2.2.1 (Okonechnikov et al. 2016); Picard CollectMultipleMetrics, CollectRawWgsMetrics and CollectWgsMetrics; and MultiQC version 1.8 (Ewels et al. 2016). We called all positions per sample in gVCF format using GATK HaplotypeCaller. To save computing time and memory, the genome was split in 10 equal parts before running the next steps of the pipeline. We combined 187 gVCF files (for all resequenced samples) using GATK CombineGVCFs for each of the 10 parts. We genotyped SNPs and indels using GATK GenotypeGVCFs to create 10 VCF files. These 10 VCF files were then merged using Picard GatherVcfs into one VCF file covering the whole-genome. From the VCF file, SNPs were

selected (i.e. indels were excluded) using `GATK SelectVariants`, after which we filtered SNPs with the following criteria:  $QD < 2.5$ ;  $FS > 45.0$ ;  $SOR > 3.0$ ;  $MG < 40$ ;  $MQRankSum < -12.5$ ;  $ReadPosRankSum < -8.0$ . We kept only blackcap samples in the VCF file with `BCFtools` (Danecek et al. 2021). We removed SNPs with per-site missingness greater than 10%, non-segregating sites, and non-biallelic sites with `BCFtools` and `VCFtools` (Danecek et al. 2011), yielding 102,753,802 SNPs in the 179 blackcaps.

## Local PCA

Genotype tables were generated from the filtered VCF file with `BCFtools` and a custom script. For each chromosome, the table was read in R (version 3.5.3). Local principal component analysis (local PCA) was performed in R using the `lostruct` package (Li and Ralph 2019), with a sliding window of 1,000 SNPs, `npc=3`, `k=3`. In each chromosome, windows with MDS1 or MDS2 values deviated from the mode of the distribution by greater than 0.3 were defined as outliers. This threshold was determined by visualising the distribution of MDS1 and MDS2 values in each chromosome. A genomic island of deviated relatedness patterns was defined as a genomic interval with at least 10 outlier windows, taking the two furthest positions as the boundaries.

Genetic relatedness pattern at each genomic island was analysed with PCA using `PLINK` (Purcell et al. 2007). All genomic islands were visually classified into the three classes based on the PCA. Genomic islands in which samples were grouped in three clusters along either PC1 or PC2 were classified as class-1. Genomic islands in which samples of certain populations were deviated from samples of all other populations on PC1-PC2 space were classified as class-2. Other genomic islands were classified as class-3. Additional PCA was performed for the same genomic regions including the outgroup samples (five garden warblers and three African hill babblers).

## Population genomics

Population genomic analyses were performed for class-1 (comparing inversion genotypes), class-2 (comparing population pairs), and class-3 (calculating nucleotide diversity in each

population) genomic islands.  $\pi$ ,  $d_{XY}$ , and  $F_{ST}$  (Hudson’s estimator) were calculated in a 10-kb sliding window with the **PopGenome** package in R (Pfeifer et al. 2014). We asked whether observed  $\pi$  in class-1 and class-2 genomic islands is smaller,  $d_{XY}$  and  $F_{ST}$  are greater, and  $\Delta\pi$  is different than the chromosomal background by performing permutation tests (left-sided, right-sided, and two-sided respectively) with 10,000 times of re-sampling. In the permutation test, we shuffled the positions of genomic windows of the **PopGenome** outputs, rather than shuffling SNP positions before calculating  $\pi$ ,  $d_{XY}$ , and  $F_{ST}$  for computational reasons (the latter would require re-calculation of the window-based summary statistics 10,000 times).

For each inversion genotype, heterozygosity was defined as the number of segregating sites in samples with a certain inversion genotype divided by the number of segregating sites in all samples. We calculated heterozygosity with **BCFtools** and a custom script.

Coalescence time for each inversion genotype was estimated with **MSMC2-decode**. Up to four samples were selected for each genotype of each inversion based on callability using **bamCaller.py** (<https://github.com/stschiff/msmc-tools>), and in each sample coalescent time was estimated with **MSMC2-decode** (Schiffels and Durbin 2014; Malaspinas et al. 2016). A generalised linear mixed-effect model (GLMM) with a Poisson distribution treating individual samples as a random-effect variable and the discretised time index between 1 and 32 as the response variable was performed with the **lme4** package in R (Bates et al. 2015). The model ( $T \sim genotype \times interval + (1|id)$ ) was selected by checking residual deviance (for the goodness of fit) and the Akaike information criterion (AIC, for the prediction error). The distribution of the residuals was visually checked with a histogram, a QQ-plot, and residual plots using the **ggResidpanel** package in R (Goode and Rey 2019). Significance of the interaction term between the genotype and the interval (inside/outside of a class-1 genomic island of deviated relatedness patterns) was tested by analysis of variance on the GLMM using the **car** package in R (Fox and Weisberg 2019). Post hoc Z-tests with Bonferroni correction were performed using the **multcomp** and **emmeans** packages in R (Searle et al. 1980; Hothorn et al. 2008). For visualisation in Fig. 3M-O and Supplementary Fig. 12, the time index with the highest posterior probability of coalescent (chosen from 32 discretised time indices) was averaged across the four samples with the same genotype in each genomic window.

Linkage disequilibrium (LD) was calculated with **VCFtools**. Because we used unphased genotype data, we calculated squared correlation coefficient  $r^2$  between genotypes of a pair of loci with the `--geno-r2` option.

We investigated introgression at the class-2 genomic island on blackcap chromosome 21 using **VolcanoFinder** (Setter et al. 2020). First, we calculated allele frequency at SNP sites in chromosome 21 in seven representative blackcap (sub)populations (Azores, Cape Verde, Canary Islands, Belgium, Gibraltar (southern Spain), and Guadarrama (central Spain)). Second, we polarised the SNPs in blackcap populations using the genotypes of the five garden warbler samples in our initial VCF file. We defined the ancestral allele as “the allele that all garden warbler samples are homozygous”, and calculated derived allele frequency in the blackcap populations, excluding sites where genotypes are segregated in the garden warbler samples. Third, we calculated unfolded site frequency spectra (SFS) on chromosome 21 using the derived allele frequency. Finally, **VolcanoFinder** was run using the derived allele frequency and unfolded SFS.

## Recombination rate

We inferred recombination landscape along blackcap chromosomes harbouring class-1, 2, and 3 genomic islands separately using **Pyrho** (Spence and Song 2019). **Pyrho** infers demography-aware recombination rates with a composite-likelihood approach from SNPs data of unrelated samples making use of likelihood lookup tables generated by simulations based on demography and sample size of each population. In all inferences, we used demography of focal populations inferred in Delmore et al. (2020). Before the recombination inference, focal samples were filtered and singletons were removed. For class-1 genomic islands, we used five samples for each of the three genotypes (AA, AB, and BB) at the inversion loci. We ran **Pyrho** with demography of medium-long distance migrants inferred in Delmore et al. (2020), with mutation rate of  $4.6 \times 10^{-9}$  per site per generation (Smeds et al. 2016), block penalty of 20, and window size of 50 kb. For class-2 genomic island on chromosome 21, we inferred population-specific recombination landscape of Azores, Cape Verde, continental resident, and medium-long distance migrants (represented by medium distance south-west migrants sampled

in Belgium), using demography of each population respectively. For class-3 genomic islands, we ran **Pyrho** using blackcap samples from continental resident population. To compare recombination rate in class-3 genomic islands between the blackcap and garden warbler, we inferred recombination rates in garden warbler. We first inferred demography of garden warbler using PSMC-mode of **MSMC2**, because our resequenced garden warblers were not phased. After confirming that **MSMC2** infers consistent demography irrespective of the input sample, we ran **Pyrho** using demography inferred from one individual (SylBor07) as the input, keeping the same values for the other parameters as the inferences in blackcap. We calculated average recombination rate in 50 kb sliding windows in blackcap and garden warbler using a custom script.

## Simulations

### Effects of selection on coalescent time at an inversion

In **SLiM** version 3.5 (Haller and Messer 2019), we simulated a 5 Mb long chromosome with a 3 Mb long inversion in a diploid population with 1,000 individuals. We set the mutation rate to  $1 \times 10^{-7}$  [per base per generation] and recombination rate to  $1 \times 10^{-6}$  [per base per generation]. The purpose of these simulations was to qualitatively assess the effect of an balancing selection between two arrangements at an inversion and background selection on coalescent time inference by **MSMC2-decode** in respect to chromosomal background, rather than quantitatively estimate expectation under the blackcap demography. As such, we kept the population size smaller than the blackcap effective population size and the mutation rate greater than assumed in order to minimise the time and computational resource for simulations, while allowing **MSMC2-decode** to run on the simulated data. We considered the following  $3 \times 3 = 9$  conditions.

#### 1. Inversion fitness

1. Neutral: Inversion genotype does not alter individual's fitness.
2. Frequency-dependent selection: Fitness of inversion is maximum when the inversion frequency is 0.1.
3. Overdominance: Selection coefficient  $s = -0.05$  and dominance  $h = -0.5$  for the

760 inverted arrangement.

## 761 2. Mutations

762 1. Neutral: All mutations are neutral.

763 2. Mixed: 80% of all mutations are neutral and the other 20% are deleterious ( $s =$   
764  $-0.05$ ,  $h = 0.5$ ).

765 3. Deleterious: All mutations are deleterious ( $s = -0.05$ ,  $h = 0.5$ ).

766 We ran 4,000 generations of burn-in to let mutations to reach an equilibrium, then  
767 introduced one copy of inversion. For each condition, we ran 10,000 replicates of simulations,  
768 recording inversion frequencies at every generation until it was removed or the simulation  
769 reaches 4,000 generations after the inversion event. We recorded mutations of all individuals  
770 in VCF at most 5 time points: 100, 500, 1,000, 2,000 and 4,000th generations (4,100, 4,500,  
771 5,000, 6,000, and 8,000 including burn-in). For each VCF file, 4 individuals for each genotype  
772 were randomly selected, and subset VCF was generated using `BCFtools`. `MSMC2-decode` was  
773 performed the same way as our empirical analysis.

## 774 **Effects of recombination suppression model on recombination rate inference at** 775 **an inversion**

776 We simulated two 5 Mb-long chromosomes with neutral mutation rate of  $4.6 \times 10^{-8}$  in a  
777 population of 1,000 individuals in `SLiM`. The purpose of these simulations was to investigate the  
778 effect of an inversion and additional recombination suppression on recombination rate inference  
779 and LD in general, rather than investigating the effects specific to blackcap demography. As  
780 such, we kept the population size smaller than the blackcap effective population size and the  
781 mutation rate greater than assumed in order to minimise the time and computational resource  
782 for simulations. We introduced a mutation (inversion marker) on one chromosome at 1 Mb  
783 position at the 50th generation. We simulated an inversion on the chromosome by suppressing  
784 recombination in an interval from 1 Mb to 4 Mb position if the inversion marker site was  
785 heterozygous. We defined additional suppression according to different scenarios (models 1-6).  
786 We applied negative frequency-dependent selection (fitness of inversion is  $1 - (p_{inv} - 0.2)$  where  
787  $p_{inv}$  is the frequency of the inversion allele). 1,000 generations after the inversion event, we

recorded the mutations in all samples, making a VCF file including all samples. Although 1,000 generations is relatively short given the population size of 1,000, the haplotype structure at the inversion locus was stable in test runs of model-1 (inversion frequency of 0.2 without additional recombination suppression). Based on the genotype at 1 Mb position, we randomly chose 10 samples for each inversion genotype. **Pyrho** was run to estimate recombination rates using the chosen 10 samples, with the block penalty 50 and window size 50. LD was calculated in the same way as the empirical data described above.

## Tandem repeats

The genomic distribution of read depth was analysed with **SAMtools** (Danecek et al. 2021) and custom scripts. **TandemRepeatsFinder** (Benson 1999) was run on the blackcap reference genome with the parameter set recommended on the documentation (`trf </path/to/fastq> 2 7 7 80 10 50 500 -f -d -m -h`). The output was formatted and summarised with a custom script.

## Synteny and phylogenetic analysis

The reference genome of the zebra finch (`taeGut1`, also known as WUSTL v3.2.4) was obtained from <https://hgdownload.cse.ucsc.edu/goldenPath/taeGut1/bigZips/>. The reference genome of the garden warbler and rifleman was obtained from GenomeArk of the Vertebrate Genomes Project (<https://vgp.github.io/genomeark/>). The reference genome of the Bengalese finch was obtained from GigaDB (<http://gigadb.org/dataset/view/id/100398/>) (Colquitt et al. 2018). The VCF file of the zebra finches was obtained from <https://doi.org/10.5061/dryad.fd24j> (Singhal et al. 2015).

We performed synteny analysis between the blackcap and zebra finch with **Satsuma** with “-l 100 -n 8” options (Grabherr et al. 2010). The synteny was visualised with the **circulize** package in R (Gu et al. 2014).

We focused on blackcap chromosomes 12 and 6 for phylogenetic analysis excluding chromosome 14, because the zebra finch VCF did not have SNPs in the region syntenic to class-1 genomic island of blackcap chromosome 14. PCA on the regions of zebra finch genome



815 syntenic to the blackcap inversions was performed with PLINK to determine inversion genotypes  
816 in zebra finch the same way as in the blackcap. Clear separation of three groups with PCA  
817 and heterozygosity appeared in regions of the zebra finch chromosomes 11 and 5 which are  
818 syntenic to the blackcap inversions on chromosomes 12 and 6 (Supplementary Fig. 17).

819 Based on the PCA in zebra finch genomic regions syntenic to blackcap inversions on the  
820 zebra finch chromosomes 11 and 5, we arbitrarily determined zebra finch samples with AA  
821 and BB genotypes. We made consensus sequences of the A and B haplotypes of blackcap  
822 chromosomes 12 and 6 and zebra finch chromosomes 11 and 5 based on allele frequencies at  
823 SNP sites in AA and BB samples with BCFtools and a custom script. Specifically, we edited  
824 the bases of the reference genome to the alternative allele where allele frequency was greater  
825 than 0.5 in each sample set. We restricted this procedure only within a genomic interval from  
826 14,126,710 bp to 22,227,355 bp of the blackcap chromosome 12 and from 10,390 bp to 7,293,168  
827 bp of the zebra finch chromosome 11, so that we can make one phylogeny using the consensus  
828 sequence in class-1 genomic island and another phylogeny in background genomic region of  
829 the same chromosome using the reference sequences.

830 We mapped the consensus sequence of the A and B haplotype of blackcap chromosome  
831 12 and 6 and zebra finch chromosomes 11 and 5 on the chromosomes 12 and 6 of the blackcap  
832 reference genome with minimap2 (Li 2018). We mapped whole-genome assembly of the garden  
833 warbler, Bengalese finch, and rifleman on the blackcap whole-genome reference with minimap2  
834 and extracted chromosomes 12 and 6. This resulted in alignment of the A and B haplotypes  
835 of the blackcap and zebra finch, the garden warbler, the Bengalese finch, and the rifleman  
836 on the blackcap reference chromosomes 12 and 6. We made aligned FASTA file from these  
837 alignment files using SAMtools, BCFtools, and custom scripts. From the alignment files, we  
838 made mask files specifying the query sequences which were not mapped as expected for unique  
839 homologous regions, by filtering out positions where the depth was not 1. We merged the  
840 mask files for all sequences and applied it to the aligned FASTA file with BEDTools (Quinlan  
841 and Hall 2010), so that genomic regions where all sequences were mapped properly could be  
842 used for phylogeny inference.

843 We inferred the phylogenetic relationship among the sequences within and outside class-1



844 genomic island of blackcap chromosomes 6 and 12 with RAxML (version 8.2.9, Stamatakis  
845 2006), with “-m GTRGAMMA -N 1000” options, assessing 1,000 trees with a maximum likelihood  
846 method. We evaluated the validity of the nodes on the best trees with 1,000 times of  
847 bootstrapping. The phylogenetic trees were visualised with the **ape** package in R (Paradis and  
848 Schliep 2019).

849 To compare the results of local PCA with Delmore et al. (2020) which use different  
850 versions of blackcap reference genomes, we performed synteny analysis between the two  
851 assemblies using **Satsuma** with “-l 100 -n 8” options (Grabherr et al. 2010).

## 852 Acknowledgements

853 This work was supported by the Max Planck Society (Max Planck Research Group grant  
854 MFFALIMN0001 to ML) and DFG Research Infrastructure NGS\_CC (project 407495230)  
855 as part of the Next Generation Sequencing Competence Network (project 423957469). NGS  
856 analyses were carried out at the Competence Centre for Genomic Analysis (Kiel). We thank  
857 Britta Meyer, Tianhao Zhao, Hanna Koch, Conny Burghardt, and Sven Künzel for DNA  
858 extraction, library preparation, and/or sequencing; Gernot Segelbacher, Thord Fransson,  
859 Christos Barboutis, Zura Javakhishvili, Stuart Bearhop, Olof Hellgren, Staffan Bensch, Martim  
860 Melo, Chris Perrins, Álvaro Ramírez, and Helena Batalha for providing us with samples; Kira  
861 Delmore for initial blackcap resequencing data set; Sonal Singhal and Molly Przeworski for  
862 zebra finch resequencing data; Julien Dutheil, Diethard Tautz, Linda Odenthal-Hesse, Tobias  
863 Kaiser, Gustavo Valadares Barroso, and Carolina Peralta for discussion. Permits were provided  
864 to JCI for samples collected in Morocco (Haut Commissariat aux Eaux et Forêts et a la Lutte  
865 Contre la Desertification, 206/2011, 13 Jan 2011), Cape Verde (Ministerio do Ambiente -  
866 Habitacao e Ordenamento do Territorio, 18/CITES/DNA, 17 Dec 2015), Canary Islands (Ref.:  
867 2012/0710), Madeira (Ref.: 02/2016), and the Azores (Instituto da Conservacao da Natureza  
868 e da Biodiversidade, 171/2008, 31 Mar 2009); to JP-T for samples collected in Gibraltar  
869 and Cazalla de la Sierra (Consejeria de Medio Ambiente, 50.725.548-Z, 12 May 2011), Álava  
870 (Arabako Foru Aldundia, Esp Zenb exp 11/32, 12 Apr 2011) and Guadarrama (Consejería de  
871 Medio Ambiente Vivenda y Ordenacion del Territorio, 10/160876.9/10, 12 Apr 2010). Thord

872 Fransson received permits for samples collected in Stockholm (Stockholms djurförsöksetiska  
873 nämnd Dnr N 16/16 2016-02-25). Permits were provided to Gernot Segelbacher for samples  
874 collected in the remaining locations (Regierungspräsidium Freiburg, 55–8853.17/0).

# References

- Aymí R, Gargallo G, Christie D. 2020. Eurasian Blackcap (*Sylvia atricapilla*). *Birds of the World*.
- Bates D, Mächler M, Bolker B, Walker S. 2015. Fitting Linear Mixed-Effects Models Using lme4. *J. Stat. Softw.* 67:1–48.
- Becquet C, Patterson N, Stone AC, Przeworski M, Reich D. 2007. Genetic Structure of Chimpanzee Populations. *PLoS Genet.* 3:e66.
- Benson G. 1999. Tandem repeats finder: A program to analyze DNA sequences. *Nucleic Acids Res.* 27:573–580.
- Berthold P. 1988. Evolutionary aspects of migratory behavior in European warblers. *J. Evol. Biol.* 1:195–209.
- Berthold P. 1991. Genetic control of migratory behaviour in birds. *Trends Ecol. Evol.* 6:254–257.
- Booker TR, Yeaman S, Whitlock MC. 2021. Global adaptation complicates the interpretation of genome scans for local adaptation. *Evol. Lett.* 5:4–15.
- Branca A, Paape TD, Zhou P, Briskine R, Farmer AD, Mudge J, Bharti AK, Woodward JE, May GD, Gentzbittel L, et al. 2011. Whole-genome nucleotide diversity, recombination, and linkage disequilibrium in the model legume *Medicago truncatula*. *Proc. Natl. Acad. Sci. U.S.A.* 108:E864–E870.
- Burri R. 2017. Interpreting differentiation landscapes in the light of long-term linked selection. *Evol. Lett.* 1:118–131.
- Butlin RK. 2005. Recombination and speciation. *Mol. Ecol.* 14:2621–2635.
- Charlesworth B. 2009. Effective population size and patterns of molecular evolution and variation. *Nat. Rev. Genet.* 10:195–205.
- Colquitt BM, Mets DG, Brainard MS. 2018. Draft genome assembly of the Bengalese finch, *Lonchura striata domestica*, a model for motor skill variability and learning. *GigaScience* 7.
- Cruickshank TE, Hahn MW. 2014. Reanalysis suggests that genomic islands of speciation are due to reduced diversity, not reduced gene flow. *Mol. Ecol.* 23:3133–3157.
- Cuadrado M. 1994. Site-tenacity and life-time expectancy of resident and over-wintering Blackcaps *Sylvia atricapilla* in the Mediterranean. *Ring. Migr.* 15:58–59.
- Danecek P, Auton A, Abecasis G, Albers CA, Banks E, DePristo MA, Handsaker RE, Lunter G, Marth GT, Sherry ST, et al. 2011. The variant call format and VCFtools. *Bioinformatics* 27:2156–2158.
- Danecek P, Bonfield JK, Liddle J, Marshall J, Ohan V, Pollard MO, Whitwham A, Keane T, McCarthy SA, Davies RM, et al. 2021. Twelve years of SAMtools and BCFtools. *GigaScience* 10.

- 911 Delmore KE, Hübner S, Kane NC, Schuster R, Andrew RL, Câmara F, Guigó R, Irwin DE.  
912 2015. Genomic analysis of a migratory divide reveals candidate genes for migration and  
913 implicates selective sweeps in generating islands of differentiation. *Mol. Ecol.* 24:1873–1888.
- 914 Delmore KE, Lugo Ramos JS, Van Doren BM, Lundberg M, Bensch S, Irwin DE, Liedvogel M.  
915 2018. Comparative analysis examining patterns of genomic differentiation across multiple  
916 episodes of population divergence in birds. *Evol. Lett.* 2:76–87.
- 917 Delmore K, Illera JC, Pérez-Tris J, Segelbacher G, Ramos JS, Durieux G, Ishigohoka J,  
918 Liedvogel M. 2020. The evolutionary history and genomics of european blackcap migration.  
919 *eLife* 9:e54462.
- 920 Ellegren H, Galtier N. 2016. Determinants of genetic diversity. *Nat. Rev. Genet.* 17:422–433.
- 921 Ewels P, Magnusson M, Lundin S, Käller M. 2016. MultiQC: Summarize analysis results for  
922 multiple tools and samples in a single report. *Bioinformatics* 32:3047–3048.
- 923 Fijarczyk A, Babik W. 2015. Detecting balancing selection in genomes: Limits and prospects.  
924 *Mol. Ecol.* 24:3529–3545.
- 925 Fox J, Weisberg S. 2019. An R Companion to Applied Regression. Third. Thousand Oaks  
926 CA: Sage
- 927 Fraser JA, Diezmann S, Subaran RL, Allen A, Lengeler KB, Dietrich FS, Heitman J. 2004.  
928 Convergent Evolution of Chromosomal Sex-Determining Regions in the Animal and Fungal  
929 Kingdoms. *PLoS Biol.* 2:e384.
- 930 Fuller ZL, Mocellin VJL, Morris LA, Cantin N, Shepherd J, Sarre L, Peng J, Liao Y, Pickrell  
931 J, Andolfatto P, et al. 2020. Population genetics of the coral *Acropora millepora*: Toward  
932 genomic prediction of bleaching. *Science* 369.
- 933 Gautier M, Flori L, Riebler A, Jaffrézic F, Laloé D, Gut I, Moazami-Goudarzi K, Foulley J-L.  
934 2009. A whole genome Bayesian scan for adaptive genetic divergence in West African cattle.  
935 *BMC Genomics* 10:550.
- 936 Ghurye J, Rhie A, Walenz BP, Schmitt A, Selvaraj S, Pop M, Phillippy AM, Koren S. 2019.  
937 Integrating Hi-C links with assembly graphs for chromosome-scale assembly. *PLoS Comput.*  
938 *Biol.* 15:e1007273.
- 939 Goode K, Rey K. 2019. ggResidpanel: Panels and Interactive Versions of Diagnostic Plots  
940 using 'ggplot2'.
- 941 Grabherr MG, Russell P, Meyer M, Mauceli E, Alföldi J, Di Palma F, Lindblad-Toh K. 2010.  
942 Genome-wide synteny through highly sensitive sequence alignment: Satsuma. *Bioinformat-*  
943 *ics* 26:1145–1151.
- 944 Gu Z, Gu L, Eils R, Schlesner M, Brors B. 2014. Circlize implements and enhances circular  
945 visualization in R. *Bioinformatics* 30:2811–2812.
- 946 Guan D, McCarthy SA, Wood J, Howe K, Wang Y, Durbin R. 2020. Identifying and removing  
947 haplotypic duplication in primary genome assemblies. *Bioinformatics* 36:2896–2898.
- 948 Guerrero RF, Rousset F, Kirkpatrick M. 2012. Coalescent patterns for chromosomal inversions  
949 in divergent populations. *Philos. T. R. Soc. B* 367:430–438.

- 950 Haller BC, Messer PW. 2019. SLiM 3: Forward Genetic Simulations Beyond the Wright–Fisher  
951 Model. *Mol. Biol. Evol.* 36:632–637.
- 952 Hartley G, O’Neill RJ. 2019. Centromere Repeats: Hidden Gems of the Genome. *Genes*  
953 10:223.
- 954 Hejase HA, Salman-Minkov A, Campagna L, Hubisz MJ, Lovette IJ, Gronau I, Siepel A. 2020.  
955 Genomic islands of differentiation in a rapid avian radiation have been driven by recent  
956 selective sweeps. *Proc. Natl. Acad. Sci. U.S.A.* 117:30554–30565.
- 957 Helbig AJ. 1991. Inheritance of migratory direction in a bird species: A cross-breeding  
958 experiment with SE- and SW-migrating blackcaps (*Sylvia atricapilla*). *Behav. Ecol.*  
959 *Sociobiol.* 28:9–12.
- 960 Horton BM, Hudson WH, Ortlund EA, Shirk S, Thomas JW, Young ER, Zinzow-Kramer  
961 WM, Maney DL. 2014. Estrogen receptor  $\alpha$  polymorphism in a species with alternative  
962 behavioral phenotypes. *Proc. Natl. Acad. Sci. U.S.A.* 111:1443–1448.
- 963 Hothorn T, Bretz F, Westfall P. 2008. Simultaneous Inference in General Parametric Models.  
964 *Biom. J.* 50:346–363.
- 965 Howe K, Chow W, Collins J, Pelan S, Pointon D-L, Sims Y, Torrance J, Tracey A, Wood J. 2021.  
966 Significantly improving the quality of genome assemblies through curation. *GigaScience*  
967 10:giaa153.
- 968 Huang K, Andrew RL, Owens GL, Ostevik KL, Rieseberg LH. 2020. Multiple chromosomal  
969 inversions contribute to adaptive divergence of a dune sunflower ecotype. *Mol. Ecol.*  
970 29:2535–2549.
- 971 Huang YC, Dang VD, Chang NC, Wang J. 2018. Multiple large inversions and breakpoint  
972 rewiring of gene expression in the evolution of the fire ant social supergene. *Proceedings of*  
973 *the Royal Society B: Biological Sciences* 285.
- 974 Hudson RR, Kaplan NL. 1995. Deleterious background selection with recombination. *Genetics*  
975 141:1605–1617.
- 976 Irwin DE, Milá B, Toews DPL, Brelsford A, Kenyon HL, Porter AN, Grossen C, Delmore KE,  
977 Alcaide M, Irwin JH. 2018. A comparison of genomic islands of differentiation across three  
978 young avian species pairs. *Mol. Ecol.* 27:4839–4855.
- 979 Jay P, Whibley A, Frézal L, Rodríguez de Cara MÁ, Nowell RW, Mallet J, Dasmahapatra  
980 KK, Joron M. 2018. Supergene Evolution Triggered by the Introgression of a Chromosomal  
981 Inversion. *Curr. Biol.* 28:1839–1845.e3.
- 982 Jones FC, Grabherr MG, Chan YF, Russell P, Mauceli E, Johnson J, Swofford R, Pirun M,  
983 Zody MC, White S, et al. 2012. The genomic basis of adaptive evolution in threespine  
984 sticklebacks. *Nature* 484:55–61.
- 985 Kim K-W, Bennison C, Hemmings N, Brookes L, Hurley LL, Griffith SC, Burke T, Birkhead  
986 TR, Slate J. 2017. A sex-linked supergene controls sperm morphology and swimming speed  
987 in a songbird. *Nat. Ecol. Evol.* 1:1168–1176.
- 988 Knief U, Forstmeier W, Pei Y, Ihle M, Wang D, Martin K, Opatová P, Albrechtová J, Wittig

989 M, Franke A, et al. 2017. A sex-chromosome inversion causes strong overdominance for  
990 sperm traits that affect siring success. *Nat. Ecol. Evol.* 1:1177–1184.

991 Knief U, Hemmrich-Stanisak G, Wittig M, Franke A, Griffith SC, Kempenaers B, Forstmeier W.  
992 2016. Fitness consequences of polymorphic inversions in the zebra finch genome. *Genome*  
993 *Biol.* 17:199.

994 Küpper C, Stocks M, Risse JE, Dos Remedios N, Farrell LL, McRae SB, Morgan TC, Karlionova  
995 N, Pinchuk P, Verkuil YI, et al. 2015. A supergene determines highly divergent male  
996 reproductive morphs in the ruff. *Nat. Genet.* 48:79–83.

997 Lamichhaney S, Fan G, Widemo F, Gunnarsson U, Thalmann DS, Hoepfner MP, Kerje S,  
998 Gustafson U, Shi C, Zhang H, et al. 2015. Structural genomic changes underlie alternative  
999 reproductive strategies in the ruff (*Philomachus pugnax*). *Nat. Genet.* 48:84–88.

1000 Li H. 2013. Aligning sequence reads, clone sequences and assembly contigs with BWA-MEM.  
1001 *arXiv*.

1002 Li H. 2018. Minimap2: Pairwise alignment for nucleotide sequences. *Bioinformatics* 34:3094–  
1003 3100.

1004 Li H, Ralph P. 2019. Local PCA Shows How the Effect of Population Structure Differs Along  
1005 the Genome. *Genetics* 211:289–304.

1006 Ma J, Amos CI. 2012. Investigation of Inversion Polymorphisms in the Human Genome Using  
1007 Principal Components Analysis. *PLoS One* 7:e40224.

1008 Malaspina A-S, Westaway MC, Muller C, Sousa VC, Lao O, Alves I, Bergström A, Athanasiadis  
1009 G, Cheng JY, Crawford JE, et al. 2016. A genomic history of Aboriginal Australia. *Nature*  
1010 538:207–214.

1011 Malinsky M, Challis RJ, Tyers AM, Schiffels S, Terai Y, Ngatunga BP, Miska EA, Durbin R,  
1012 Genner MJ, Turner GF. 2015. Genomic islands of speciation separate cichlid ecomorphs in  
1013 an East African crater lake. *Science* 350:1493–1498.

1014 Martin SH, Davey JW, Salazar C, Jiggins CD. 2019. Recombination rate variation shapes  
1015 barriers to introgression across butterfly genomes. *PLoS Biol.* 17:1–28.

1016 Mathieson I, Scally A. 2020. What is ancestry? *PLoS Genet.* 16:e1008624.

1017 McKenna A, Hanna M, Banks E, Sivachenko A, Cibulskis K, Kernytsky A, Garimella K,  
1018 Altshuler D, Gabriel S, Daly M, et al. 2010. The Genome Analysis Toolkit: A MapReduce  
1019 framework for analyzing next-generation DNA sequencing data. *Genome Res.* 20:1297–1303.

1020 Melters DP, Bradnam KR, Young HA, Telis N, May MR, Ruby JG, Sebra R, Peluso P, Eid J,  
1021 Rank D, et al. 2013. Comparative analysis of tandem repeats from hundreds of species  
1022 reveals unique insights into centromere evolution. *Genome Biol.* 14:R10.

1023 Merritt JR, Grogan KE, Zinzow-Kramer WM, Sun D, Ortlund EA, Yi SV, Maney DL. 2020. A  
1024 supergene-linked estrogen receptor drives alternative phenotypes in a polymorphic songbird.  
1025 *Proc. Natl. Acad. Sci. U.S.A.* 117:21673–21680.

1026 Mérot C. 2020. Making the most of population genomic data to understand the importance of  
1027 chromosomal inversions for adaptation and speciation. *Mol. Ecol.* 29:2513–2516.

1028 Mérot C, Berdan EL, Cayuela H, Djambazian H, Ferchaud A-L, Laporte M, Normandeau E,  
1029 Ragoussis J, Wellenreuther M, Bernatchez L. 2021. Locally Adaptive Inversions Modulate  
1030 Genetic Variation at Different Geographic Scales in a Seaweed Fly. *Mol. Biol. Evol.*  
1031 38:3953–3971.

1032 Nachman MW, Payseur BA. 2012. Recombination rate variation and speciation: Theoretical  
1033 predictions and empirical results from rabbits and mice. *Philos. T. R. Soc. B* 367:409–421.

1034 Noor M, Bennett S. 2009. Islands of speciation or mirages in the desert? Examining the role  
1035 of restricted recombination in maintaining species. *Heredity* 103:439–444.

1036 Okonechnikov K, Conesa A, García-Alcalde F. 2016. Qualimap 2: Advanced multi-sample  
1037 quality control for high-throughput sequencing data. *Bioinformatics* 32:292–294.

1038 Paradis E, Schliep K. 2019. Ape 5.0: An environment for modern phylogenetics and evolution-  
1039 ary analyses in R. *Bioinformatics* 35:526–528.

1040 Paris JR, Whiting JR, Daniel MJ, Obiol JF, Parsons PJ, Zee MJ van der, Wheat CW, Hughes  
1041 KA, Fraser BA. 2021. A large and diverse autosomal haplotype is associated with sex-linked  
1042 colour polymorphism in the guppy. *bioRxiv*:2021.04.08.437888.

1043 Paschou P, Ziv E, Burchard EG, Choudhry S, Rodriguez-Cintron W, Mahoney MW, Drineas P.  
1044 2007. PCA-Correlated SNPs for Structure Identification in Worldwide Human Populations.  
1045 *PLoS Genet.* 3:e160.

1046 Patterson N, Price AL, Reich D. 2006. Population Structure and Eigenanalysis. *PLoS Genet.*  
1047 2:e190.

1048 Perrier C, Rougemont Q, Charmantier A. 2020. Demographic history and genomics of local  
1049 adaptation in blue tit populations. *Evol. Appl.* 13:1145–1165.

1050 Pérez-Tris J, Carbonell R, Tellería JL. 1999. A method for differentiating between sedentary  
1051 and migratory Blackcaps *Sylvia atricapilla* in wintering areas of southern Iberia. *Bird Stud.*  
1052 46:299–304.

1053 Pfeifer B, Wittelsbuerger U, Ramos-Onsins SE, Lercher MJ. 2014. PopGenome: An Efficient  
1054 Swiss Army Knife for Population Genomic Analyses in R. *Mol. Biol. Evol.* 31:1929–1936.

1055 Pracana R, Priyam A, Levantis I, Nichols RA, Wurm Y. 2017. The fire ant social chromosome  
1056 supergene variant Sb shows low diversity but high divergence from SB. *Mol. Ecol.* 26:2864–  
1057 2879.

1058 Price AL, Patterson NJ, Plenge RM, Weinblatt ME, Shadick NA, Reich D. 2006. Principal  
1059 components analysis corrects for stratification in genome-wide association studies. *Nat.*  
1060 *Genet.* 38:904–909.

1061 Purcell J, Brelsford A, Wurm Y, Perrin N, Chapuisat M. 2014. Convergent Genetic Architecture  
1062 Underlies Social Organization in Ants. *Curr. Biol.* 24:2728–2732.

1063 Purcell S, Neale B, Todd-Brown K, Thomas L, Ferreira MAR, Bender D, Maller J, Sklar P,  
1064 Bakker PIW de, Daly MJ, et al. 2007. PLINK: A Tool Set for Whole-Genome Association  
1065 and Population-Based Linkage Analyses. *The American Journal of Human Genetics*  
1066 81:559–575.



1067 Quinlan AR, Hall IM. 2010. BEDTools: A flexible suite of utilities for comparing genomic  
1068 features. *Bioinformatics* 26:841–842.

1069 Renaut S, Grassa CJ, Yeaman S, Moyers BT, Lai Z, Kane NC, Bowers JE, Burke JM, Rieseberg  
1070 LH. 2013. Genomic islands of divergence are not affected by geography of speciation in  
1071 sunflowers. *Nat. Commun.* 4:1827.

1072 Rhie A, McCarthy SA, Fedrigo O, Damas J, Formenti G, Koren S, Uliano-Silva M, Chow W,  
1073 Fungtammasan A, Kim J, et al. 2021. Towards complete and error-free genome assemblies  
1074 of all vertebrate species. *Nature* 592:737–746.

1075 Roesti M, Moser D, Berner D. 2013. Recombination in the threespine stickleback genome—  
1076 patterns and consequences. *Mol. Ecol.* 22:3014–3027.

1077 Ruiz-Arenas C, Cáceres A, López-Sánchez M, Tolosana I, Pérez-Jurado L, González JR. 2019.  
1078 scoreInvHap: Inversion genotyping for genome-wide association studies. *PLoS Genet.*  
1079 15:e1008203.

1080 Schiffels S, Durbin R. 2014. Inferring human population size and separation history from  
1081 multiple genome sequences. *Nat. Genet.* 46:919–925.

1082 Searle SR, Speed FM, Milliken GA. 1980. Population Marginal Means in the Linear Model:  
1083 An Alternative to Least Squares Means. *Amer. Statist.* 34:216–221.

1084 Setter D, Mousset S, Cheng X, Nielsen R, DeGiorgio M, Hermisson J. 2020. VolcanoFinder:  
1085 Genomic scans for adaptive introgression. *PLoS Genet.* 16:e1008867.

1086 Singhal S, Leffler EM, Sannareddy K, Turner I, Venn O, Hooper DM, Strand AI, Li Q, Raney B,  
1087 Balakrishnan CN, et al. 2015. Stable recombination hotspots in birds. *Science* 350:928–932.

1088 Smeds L, Qvarnström A, Ellegren H. 2016. Direct estimate of the rate of germline mutation  
1089 in a bird. *Genome Res.* 26:1211–1218.

1090 Speidel L, Forest M, Shi S, Myers SR. 2019. A method for genome-wide genealogy estimation  
1091 for thousands of samples. *Nat. Genet.* 51:1321–1329.

1092 Spence JP, Song YS. 2019. Inference and analysis of population-specific fine-scale recombination  
1093 maps across 26 diverse human populations. *Sci. Adv.* 5:eaaw9206.

1094 Stamatakis A. 2006. RAxML-VI-HPC: Maximum likelihood-based phylogenetic analyses with  
1095 thousands of taxa and mixed models. *Bioinformatics* 22:2688–2690.

1096 Todesco M, Owens GL, Bercovich N, Légaré J-S, Soudi S, Burge DO, Huang K, Ostevik  
1097 KL, Drummond EBM, Imerovski I, et al. 2020. Massive haplotypes underlie ecotypic  
1098 differentiation in sunflowers. *Nature* 584:602–607.

1099 Tuttle EM, Bergland AO, Korody ML, Brewer MS, Newhouse DJ, Minx P, Stager M, Betuel  
1100 A, Chevireon ZA, Warren WC, et al. 2016. Divergence and functional degradation of a sex  
1101 chromosome-like supergene. *Curr. Biol.* 26:344–350.

1102 Vijay N, Weissensteiner M, Burri R, Kawakami T, Ellegren H, Wolf JBW. 2017. Genomewide  
1103 patterns of variation in genetic diversity are shared among populations, species and higher-  
1104 order taxa. *Mol. Ecol.* 26:4284–4295.



- 1105 Weissensteiner MH, Bunikis I, Catalán A, Francoijs K-j, Knief U, Heim W, Peona V, Pophaly  
1106 SD, Sedlazeck FJ, Suh A, et al. 2020. Discovery and population genomics of structural  
1107 variation in a songbird genus. *Nat. Commun.* 11.
- 1108 Weissensteiner MH, Suh A. 2019. Repetitive DNA: The Dark Matter of Avian Genomics. In:  
1109 Kraus RHS, editor. *Avian Genomics in Ecology and Evolution: From the Lab into the*  
1110 *Wild*. Cham: Springer International Publishing. pp. 93–150.
- 1111 Wellenreuther M, Bernatchez L. 2018. Eco-Evolutionary Genomics of Chromosomal Inversions.  
1112 *Trends Ecol. Evol.* 33:427–440.
- 1113 Willing E-M, Bentzen P, Van OOSTERHOUT C, Hoffmann M, Cable J, Breden F, Weigel D,  
1114 Dreyer C. 2010. Genome-wide single nucleotide polymorphisms reveal population history  
1115 and adaptive divergence in wild guppies. *Mol. Ecol.* 19:968–984.
- 1116 Wu CI. 2001. The genic view of the process of speciation. *J. Evol. Biol.* 14:851–865.
