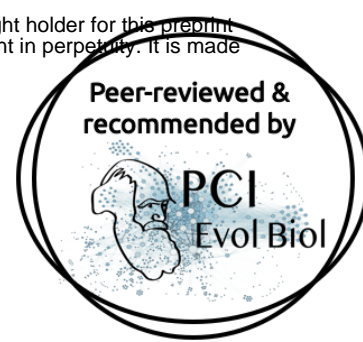

## Distinct patterns of genetic variation at low-recombining genomic regions represent haplotype structure

Jun Ishigohoka<sup>1,\*</sup>      Karen Bascón-Cardozo<sup>1</sup>      Andrea Bours<sup>1</sup>      Janina Fuß<sup>2</sup>  
Arang Rhie<sup>3</sup>      Jacquelyn Mountcastle<sup>4</sup>      Bettina Haase<sup>4</sup>      William Chow<sup>5</sup>  
Joanna Collins<sup>5</sup>      Kerstin Howe<sup>5</sup>      Marcela Uliano-Silva<sup>5</sup>      Olivier Fedrigo<sup>4</sup>  
Erich D. Jarvis<sup>4,6,7</sup>      Javier Pérez-Tris<sup>8</sup>      Juan Carlos Illera<sup>9</sup>  
Miriam Liedvogel<sup>1,10,\*</sup>

<sup>1</sup>Max Planck Institute for Evolutionary Biology, Plön, Germany

<sup>2</sup>Institute of Clinical Molecular Biology (IKMB), Kiel University, Kiel, Germany

<sup>3</sup>Genome Informatics Section, Computational and Statistical Genomics Branch, National Human Genome Research Institute, National Institutes of Health, Bethesda, MD, USA

<sup>4</sup>The Vertebrate Genome Lab, Rockefeller University, New York, NY, USA

<sup>5</sup>Wellcome Sanger Institute, Cambridge, UK

<sup>6</sup>Laboratory of Neurogenetics of Language, Rockefeller University, New York, NY, USA

<sup>7</sup>The Howards Hughes Medical Institute, Chevy Chase, MD, USA

<sup>8</sup>Department of Biodiversity, Ecology and Evolution, Complutense University of Madrid, Madrid, Spain

<sup>9</sup>Biodiversity Research Institute (CSIC-Oviedo University-Principality of Asturias), Oviedo University, Mieres, Spain

<sup>10</sup>Institute of Avian Research, Wilhelmshaven, Germany

\* Correspondence: [Jun Ishigohoka <ishigohoka@evolbio.mpg.de>](mailto:ishigohoka@evolbio.mpg.de), [Miriam Liedvogel <liedvogel@evolbio.mpg.de>](mailto:liedvogel@evolbio.mpg.de)

## 1 **Abstract**

2 Genetic variation of the entire genome represents population structure, yet individual loci  
3 can show distinct patterns. Such deviations identified through genome scans have often been  
4 attributed to effects of selection instead of randomness. This interpretation assumes that long  
5 enough genomic intervals average out randomness in underlying genealogies, which represent  
6 local genetic ancestries. However, an alternative explanation to distinct patterns has not been  
7 fully addressed: too few genealogies to average out the effect of randomness. Specifically,  
8 distinct patterns of genetic variation may be due to reduced local recombination rate, which  
9 reduces the number of genealogies in a genomic window. Here, we associate distinct patterns of  
10 local genetic variation with reduced recombination rates in a songbird, the Eurasian blackcap  
11 (*Sylvia atricapilla*), using genome sequences and recombination maps. We find that distinct  
12 patterns of local genetic variation reflect haplotype structure at low-recombining regions  
13 either shared in most populations or found only in a few populations. At the former species-  
14 wide low-recombining regions, genetic variation depicts conspicuous haplotypes segregating  
15 in multiple populations. At the latter population-specific low-recombining regions, genetic  
16 variation represents variance among cryptic haplotypes within the low-recombining populations.  
17 With simulations, we confirm that these distinct patterns of haplotype structure evolve due  
18 to reduced recombination rate, on which the effects of selection can be overlaid. Our results  
19 highlight that distinct patterns of genetic variation can emerge through evolution of reduced  
20 local recombination rate. Recombination landscape as an evolvable trait therefore plays  
21 an important role determining the heterogeneous distribution of genetic variation along the  
22 genome.

## 23 **Introduction**

24 Patterns of genetic variation in the genome represent ancestries of sequences and are influenced  
25 by population history. While genome-wide genetic variation represents population structure  
26 (McVean, 2009; Patterson et al., 2006), randomness in genealogies also contributes to fluctuation  
27 of local genetic variation along recombining chromosomes. Specifically, genealogies can differ  
28 between loci even under the same population history (Dutheil et al., 2009; Martin & Van  
29 Belleghem, 2017; McVean & Cardin, 2005; Pamilo & Nei, 1988; Wakeley, 2008, 2020; Wiuf  
30 & Hein, 1999). This is because realisation of a genealogy under a given population history  
31 is a probabilistic process: an ancestral haplotype for a set of individuals at one locus is not  
32 necessarily a common ancestor of the same set of individuals at another locus (Shipilina et  
33 al., 2023). Patterns of local genetic variation along the genome tend to conform with the  
34 population structure with random fluctuation (Fig. 1).

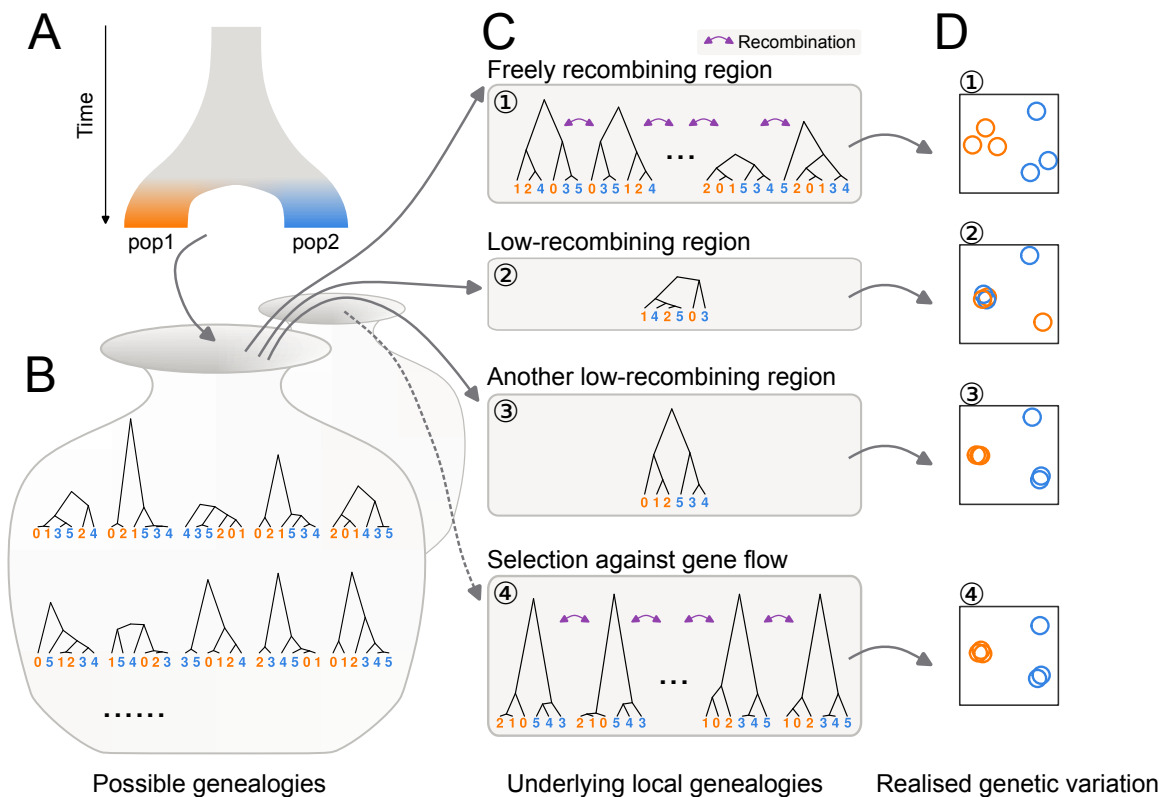

**Figure 1: Distinct patterns of genetic variation can be due to reduced recombination rate.** Population history (A) affects the distribution of possible genealogies (B) from which local genealogies are drawn (C). The number of genealogies in a genomic interval with a fixed physical length depends on the local recombination rate (C). Mutations occurring on the genealogies (not shown) determine the patterns of realised genetic variation. The realised genetic variation can be summarised and visualised with various methods such as PCA (D). (1) In freely recombining neutral regions, mutations represent many genealogies and hence the pattern of genetic variation converges to the population structure. (2, 3) In low-recombining neutral regions, mutations represent few genealogies covering the region leading to patterns of genetic variation distinct from the population structure. (3) Due to randomness in sampling of genealogies, some of such distinct patterns can be similar to patterns expected at targets of selective factors (c.f. 4). (4) At targets of selection, distribution of possible genealogies is different from that at neutral regions, which is depicted as a different set of possible genealogies in B and the dotted arrow.

35 Inference of population structure as well as other genome-wide analyses based on genetic  
 36 variation take advantage of a sufficient number of unlinked variable sites (e.g. single nucleotide  
 37 polymorphisms (SNPs)) to eliminate the effect of randomness. One of the most common  
 38 methods to summarise population structure based on this approach is principal component  
 39 analysis (PCA) applied on a whole-genome genotype table (McVean, 2009; Price et al., 2006).  
 40 In a whole-genome PCA, variation among individuals based on variable sites of the entire  
 41 genome are usually projected onto a few major axes (some analyses use many more axes), and



42 the distances among individuals on these reduced dimensions represent genetic differences.  
43 Summarising population structure and other related measures using the entire genome has  
44 been proven to be an effective approach to eliminate random fluctuation of genealogies along  
45 the genome (Bhatia et al., 2013; Cao et al., 2020; Fedorova et al., 2013; Peter, 2022; Shao et  
46 al., 2023).

47 However, some fundamental biological questions concern selective factors that systemat-  
48 ically bias the shape of genealogies at a genomic local scale, shifting the expected patterns  
49 of genetic variation from the population structure. For example, patterns of local genetic  
50 variation are distinct under selection against gene flow (Fig. 1C4), positive selection and  
51 adaptive introgression because they affect coalescence rate, topology, and branch lengths  
52 of the underlying genealogies (Hejase et al., 2020; Martin et al., 2015; Setter et al., 2020;  
53 Speidel et al., 2019; Wolf & Ellegren, 2017). Empirically, genome scans of population genetic  
54 summary statistics have been commonly used to identify regions with distinct patterns of  
55 genetic variation (Delmore et al., 2018; Irwin et al., 2018; Kawakami et al., 2017; Roesti et al.,  
56 2013; Rougemont et al., 2021). Many of these have identified regions with distinct patterns,  
57 such as elevated differentiation and reduced diversity, within low-recombining genomic regions  
58 (Geraldes et al., 2011; Kawakami et al., 2017; Renaut et al., 2013; Roesti et al., 2013, 2013;  
59 Rougemont et al., 2021). Distinct patterns at low-recombining regions can influence the  
60 chromosome-wide (Knief et al., 2016; Neafsey et al., 2010) and even genome-wide population  
61 structure (Mérot et al., 2021). These associations between distinct patterns of genetic variation  
62 at “outlier regions” or “genomic islands” and reduced recombination rate is often interpreted  
63 as linked selection (Burri et al., 2015; Burri, 2017; Delmore et al., 2015, 2018; Irwin et al., 2018;  
64 Kawakami et al., 2017; Roesti et al., 2013; Rougemont et al., 2021; Van Doren et al., 2017).  
65 However, a non-selective explanation is equally conceivable and yet often overlooked: the focal  
66 genomic region may contain too few underlying genealogies for a genome scan to eliminate the  
67 effect of random fluctuation simply due to low recombination rate, which is represented as the  
68 distinct patterns of genetic variation (Booker et al., 2020; Lotterhos, 2019). Specifically, it has  
69 not been well studied what aspects of distinct patterns of genetic variation can be explained  
70 by reduced recombination rate, and what other aspects reflect the effect of selection.

71 We address the effect of reduced recombination rate on local genetic variation using  
72 a songbird species, Eurasian blackcap (*Sylvia atricapilla*, hereafter “blackcap”), which is  
73 characterised by variability in seasonal migration across its distribution range (Berthold, 1988,  
74 1991; Delmore et al., 2020a; Helbig, 1991). Populations with diverged migratory phenotypes  
75 split as recently as ~30,000 years ago, likely corresponding to the last glacial period and  
76 now exhibit population structure (Fig. 2A-C, Sup. Fig. 1) (Delmore et al., 2020b). Due  
77 to their recent split and relatively large effective population size, genetic differentiation is  
78 very low among blackcap populations (Delmore et al., 2020b). The presence of population  
79 structure albeit with the low levels of differentiation makes the blackcap a perfect system  
80 to investigate local deviations of genetic variation: even the slightest effects of factors that  
81 change local genetic variation are likely detectable because such effects are not obscured by  
82 population structure. In addition, fine-scale recombination maps for multiple populations  
83 are available for this species (Bascón-Cardozo et al., 2022a), facilitating investigation of the  
84 relationship between changes in the recombination landscape and locally distinct patterns of  
85 genetic variation.

86 By leveraging a large-scale genomic re-sequencing dataset, we first systematically explore  
87 distinct patterns of local genetic variation along the blackcap genome, and compare these with  
88 genomic regions exhibiting reduced recombination rate. We further investigate the patterns of  
89 genetic variation in outlier regions and associate them with the prevalence of recombination  
90 suppression across populations. We also conduct simulations to analyse how reduced local  
91 recombination rate in the entire species and in a subpopulation with and without selection  
92 affects patterns of genetic variation through time. Finally, we propose a model of local genetic  
93 variation representing haplotype structure corresponding to evolutionary changes in local  
94 recombination rate.

## 95 **Results**

### 96 **Chromosome-level reference assembly**

97 To allow population genomic analyses in the blackcap system, we generated a chromosome-level  
98 reference genome using the Vertebrate Genomes Project pipeline v1.5 (Rhie et al., 2021). We  
99 collected blood of a female blackcap from Tarifa, Spain population. We generated contigs  
100 from Pacbio long reads, sorted haplotypes, and scaffolded them with 10X Genomics linked  
101 reads, Bionano Genomics optical mapping, and Arima Genomics Hi-C linked reads. Base call  
102 errors were polished with both PacBio long reads and Arrow short reads to achieve above Q40  
103 accuracy (no more than 1 error every 10,000 bp). Manual curation identified 33 autosomes and  
104 Z and W chromosomes (plus 1 unlocalised W). Autosomes were named in decreasing order of  
105 size, and all had counterparts in the commonly used VGP reference zebra finch assembly (Sup.  
106 Table 2). The final 1.1 Gb assembly had 99.14% assigned to chromosomes, with a contig N50  
107 of 7.4 Mb, and scaffold N50 of 73 Mb, indicating a high-quality assembly that fulfills the VGP  
108 standard metrics. The primary and alternate haplotype assemblies are provided under NCBI  
109 BioProject PRJNA558064, accession numbers GCA\_009819655.1 and GCA\_009819715.1.

### 110 **Deviation of genetic variation coincides with low-recombining regions**

111 To investigate the genome-wide distribution of genetic variation, we mapped short reads of  
112 the whole-genomes of 179 blackcaps including 69 newly sequenced individuals (Sup. Table  
113 1) on a *de novo*-assembled reference genome generated through the Vertebrate Genomes  
114 Project (VGP, Rhie et al., 2021), and called SNPs ([Materials and Methods](#)). To characterise  
115 genome-wide genetic variation, we performed PCA using SNPs in all autosomes, revealing  
116 population structure. While PC1 and PC2 represented differentiation of island populations  
117 (Fig. 2B), PC3 represented structure within continental populations with different migratory  
118 phenotypes (Fig. 2C). To identify genomic regions with patterns of genetic variation distinct  
119 from the population structure, we performed local PCA using `lostruct` (Li & Ralph, 2019).  
120 Briefly, `lostruct` performs PCA in sliding genomic windows and dissimilarity of PCA among  
121 windows are summarised with multidimensionality scaling (MDS). Distinct patterns of genetic  
122 variation of windows relative to the background are represented by extreme values along

123 the MDS axes. Multiple windows with correlated patterns of genetic variation distinct  
124 from the population structure are represented by extreme values along the same MDS axis.  
125 This approach allowed systematic and unbiased exploration unaffected by our definition of  
126 populations of the blackcaps. We performed `lostruct` on both genotype and phased haplotype  
127 data with window size of 1,000 SNPs. We identified outlier windows by applying threshold  
128 MDS values (the mode of the distribution  $\pm 0.3$ ). We further identified genomic regions with  
129 distinct patterns of genetic variation by finding genomic intervals longer than 100 kb with  
130 at least five outlier windows based on the same MDS axis and merging the intervals based  
131 on the genotype- and phased haplotype-based approaches. This yielded 32 genomic regions  
132 with distinct patterns of variation (hereafter “outlier regions”, Fig. 2D, Sup. Table 3, Sup.  
133 Fig. 3). Their size ranged from 0.12 to 8.11 Mb (mean and median of 0.71 and 0.29 Mb),  
134 and each region contained 5,000 to 356,000 SNPs. Comparing the genomic distribution of  
135 these outlier regions to population-level recombination maps, we found that low-recombining  
136 regions (nominally recombination rate lower than the 20 percentile of each chromosome) were  
137 significantly enriched in the outlier regions (permutation tests with  $n = 1,000$ ,  $p$ -value =  
138 0.000 (Sup. Fig. 10)). Among these 32 outlier regions, 19 coincided with regions in which  
139 recombination rate was reduced in most tested populations (“species-wide” low-recombining  
140 regions), 11 coincided with regions in which recombination rate was reduced in one or two  
141 populations (“population-specific” low-recombining regions), and two did not coincide with  
142 low-recombining regions in any population (Fig. 2E, F, Sup. Fig. 9).

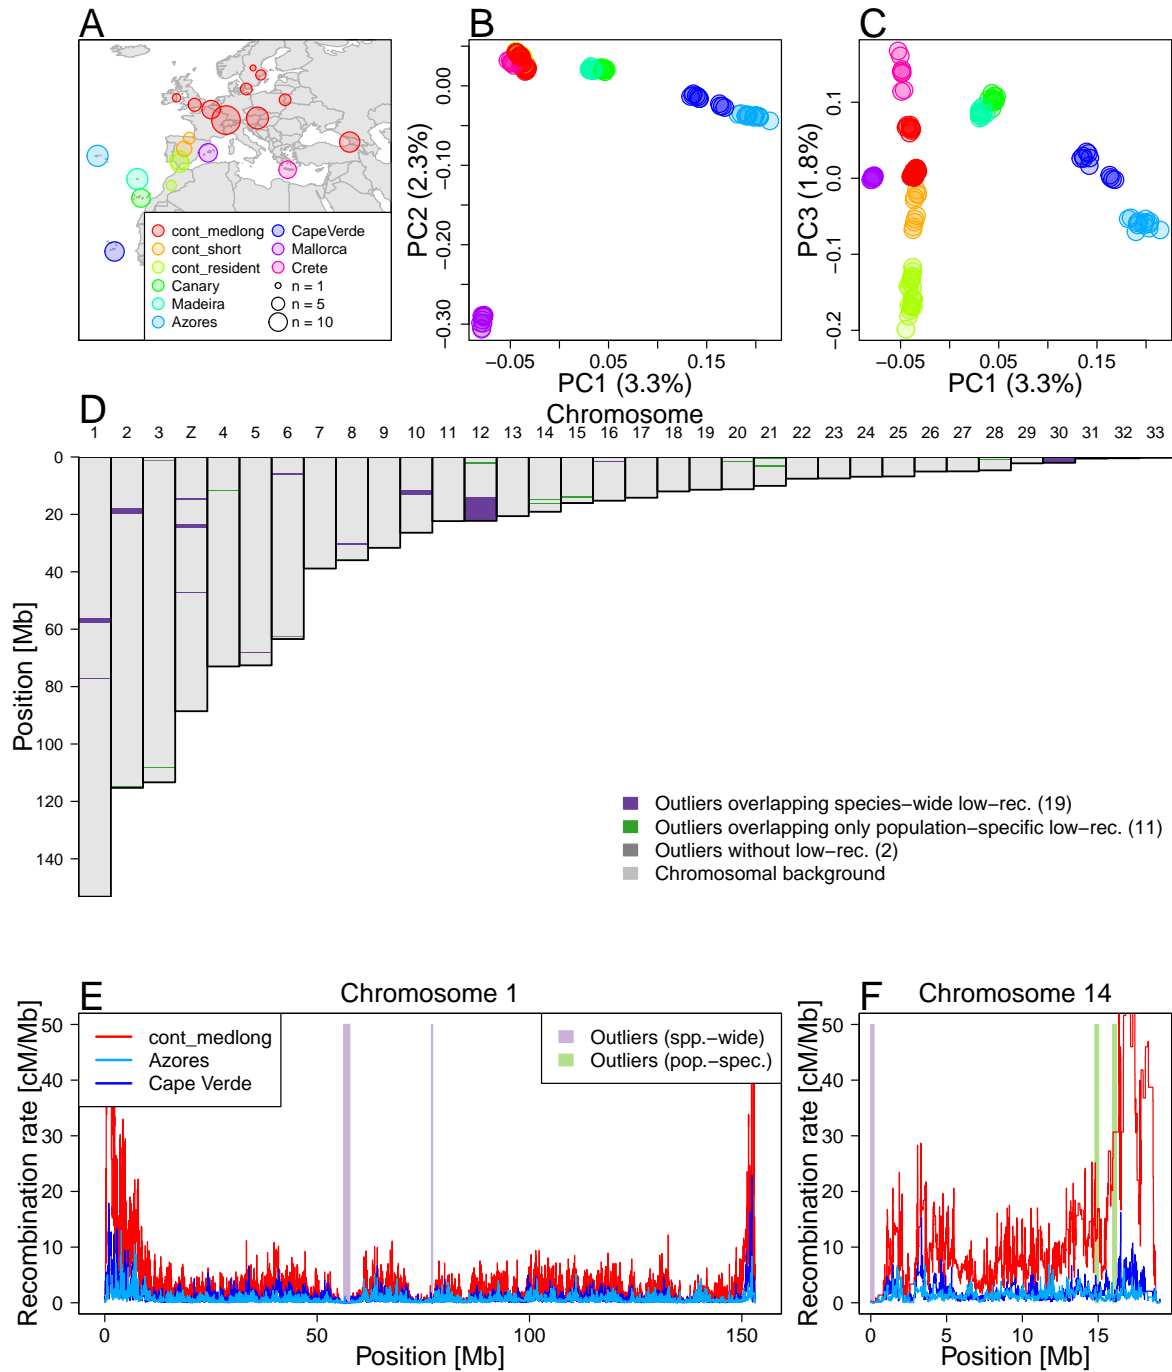

**Figure 2: Local PCA outliers coincide with species-wide and population-specific low-recombining regions** **A**. Geographic location of blackcap populations included in this study. Each point on the map represents a sampling location where multiple individuals were sampled. Populations were defined based on the geographic location, migratory phenotype, and genomic-wide population structure. **B**, **C**. Genome-wide PCA illustrating population structure. **D**. Distribution of outlier regions based on local PCA using *lostruct*. **E**, **F** Inferred recombination rates along two exemplified chromosomes (chromosomes 1 and 14) in three blackcap populations (cont\_medlong, Azores, and Cape Verde). In **D-F**, purple and green shades respectively indicate positions of outliers that coincide with species-wide and population-specific low-recombining regions. The two green shades in **F** both overlap with Azores and Cape Verde-specific low-recombining regions. cont\_medlong: medium and long distance migrant population breeding on the continent; cont\_short: short distance migrant population breeding on the continent; cont\_res: resident (non-migrant) population breeding on the continent. All island populations (Canary, Madeira, Azores, Cape Verde, Mallorca and Crete) are resident.

143 To further investigate the outlier regions, we separately performed PCA using SNPs in  
144 each region, revealing diverse patterns of distinct genetic variation (Fig. 3A-C top). First,  
145 species-wide low-recombining regions showed different levels of clustering of individuals in  
146 PCA. Specifically, the PCA projections consisted of either three distinct clusters (Fig. 3A  
147 top, Sup. Fig. 6), six loose clusters (Fig. 3B top, Sup. Fig. 6), or mixture of all individuals  
148 without apparent clustering (Sup. Fig. 6), suggesting that they represent haplotype structure  
149 with different numbers of low-recombining alleles. These clusters did not clearly separate  
150 populations, indicating a greater contribution of haplotype structure than the population  
151 structure. Four of these (e.g. Fig. 3A top, Sup. Figs. 6, 11) had the clearest clustering  
152 patterns with three groups of individuals in PCA, which is expected for a haplotype block  
153 with two distinct alleles (Huang et al., 2020; Ma & Amos, 2012; Todesco et al., 2020). Two  
154 of these regions showed LD patterns consistent with segregating inversions (Fig. 3A bottom,  
155 Sup. Fig. 12), and the other two showed patterns of non-inversion haplotype blocks (Sup. Fig.  
156 12), indicating that recombination suppression with different mechanisms resulted in similar  
157 patterns of genetic variation due to presence of two distinct segregating haplotypes.

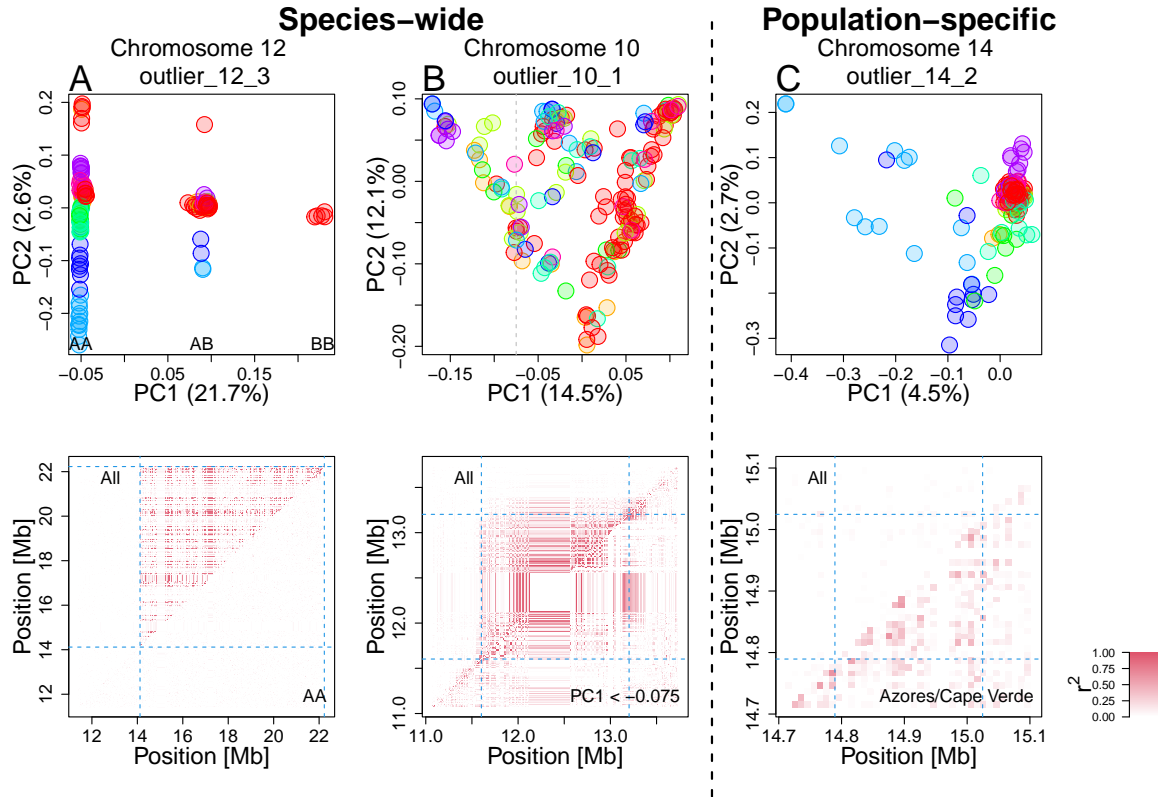

**Figure 3: Patterns of genetic variation and linkage disequilibrium at local PCA outliers**  
**Top:** PCA at exemplified outlier regions visualising the patterns of local genetic variation. Data points represent blackcap individuals colour-coded by population as depicted in Fig. 2. **Bottom:** LD calculated for all individuals (top-left diagonal) and for subset individuals (bottom-right diagonal). **A.** A putative inversion. Three clusters correspond to combination of two non-recombining alleles possessed by individuals, depicted as AA, AB, and BB. LD calculated using AA individuals is not elevated, in line with heterozygote-specific recombination suppression at an inversion locus (Sup. Fig. 14). **B.** A species-wide low-recombining region with six loose clusters of individuals. LD calculated using subset individuals was elevated, suggesting genotype-non-specific recombination suppression. **C.** A population-specific low-recombining region. The variance in genetic distances between individuals of the low-recombining populations (Azores (blue) and Cape Verde (light blue)) is greater than between other pairs of individuals (top). LD calculated using individuals of the low-recombining populations is elevated (bottom).

158        Second, population-specific low-recombining regions exhibited distinct patterns of genetic  
159 variation consistently across the outlier regions. While individuals from the low-recombining  
160 populations were spread in PCA projections, individuals of other populations were more  
161 densely clustered (Fig. 3C top). This pattern indicates that the variance in genetic distances  
162 between a pair of individuals of the low-recombining populations is greater than between  
163 individuals of normally recombining populations. LD was elevated only in the low-recombining  
164 populations (Fig. 3C bottom), supporting population-specific reduction in recombination rate.

## 165 **Reduced recombination rate generates distinct patterns of genetic variation**

166 To discern the effect of reduced recombination rate, demographic history, and unequal sample  
167 sizes among population on outlier regions, we performed neutral coalescent simulations using  
168 `msprime` (Baumdicker et al., 2022). We prepared 11 scenarios differing in the presence/absence  
169 of population subdivision, equal/unequal sizes of populations, presence/absence of gene flow  
170 between populations, and recombination rate in the middle of the chromosome relative to  
171 the chromosomal background (Sup. Fig. 19, Sup. Table 8). We applied `lostruct` on the  
172 simulated data to identify outlier regions. In all 1,000 replicates, reduced local recombination  
173 rate resulted in distinct patterns of genetic variation irrespective of the population structure  
174 and demographic history (Sup. Fig. 20). We also asked whether population genetic summary  
175 statistics are affected. The mean nucleotide diversity ( $\pi$ ), Tajima's D, and  $F_{ST}$  were not  
176 affected, yet the variance of these statistics was greater within the low-recombining region  
177 than in the chromosomal background (Sup. Figs. 21, 22, 23).

178 To address how species-wide and population-specific reduction in recombination rate  
179 affect the patterns of genetic variation over time, we performed forward simulations using  
180 `SLiM` (Haller & Messer, 2022). First, to investigate the effects of species-wide reduction in  
181 local recombination rate, we simulated one ancestral population of 1,000 diploids with a low-  
182 recombining genomic region that splits into three subpopulations (pop1, pop2, pop3. Fig. 4A).  
183 We sampled individuals over time after the populations split and conducted PCA both in the  
184 low-recombining and normally recombining genomic regions. PCA patterns at low-recombining  
185 regions (Fig. 4B, C, Sup. Fig. 24) were distinct from normally recombining regions (Fig. 4D).  
186 The low-recombining regions exhibited three, six, or more clusters of individuals resembling  
187 our empirical results. The clusters of individuals represented genotypes consisting of different  
188 combinations of ancestral haplotypes (Sup. Fig. 25). The distinct patterns representing  
189 haplotype structure persisted until population structure started to emerge along the PC axes  
190 (Fig. 4B, C). Accordingly, the percentages of variation explained by PC1 and PC2 were higher  
191 at low-recombining regions than in normally recombining region until this transition (Fig. 4C).  
192 Distinct patterns in the low-recombining regions persisted over longer times than it took for  
193 population structure in normally recombining region to emerge (Fig. 4D). These results suggest



194 that distinct patterns of genetic variation in species-wide low-recombining regions represent  
195 haplotype structure whose transition to the population structure is slower than in normally  
196 recombining regions.

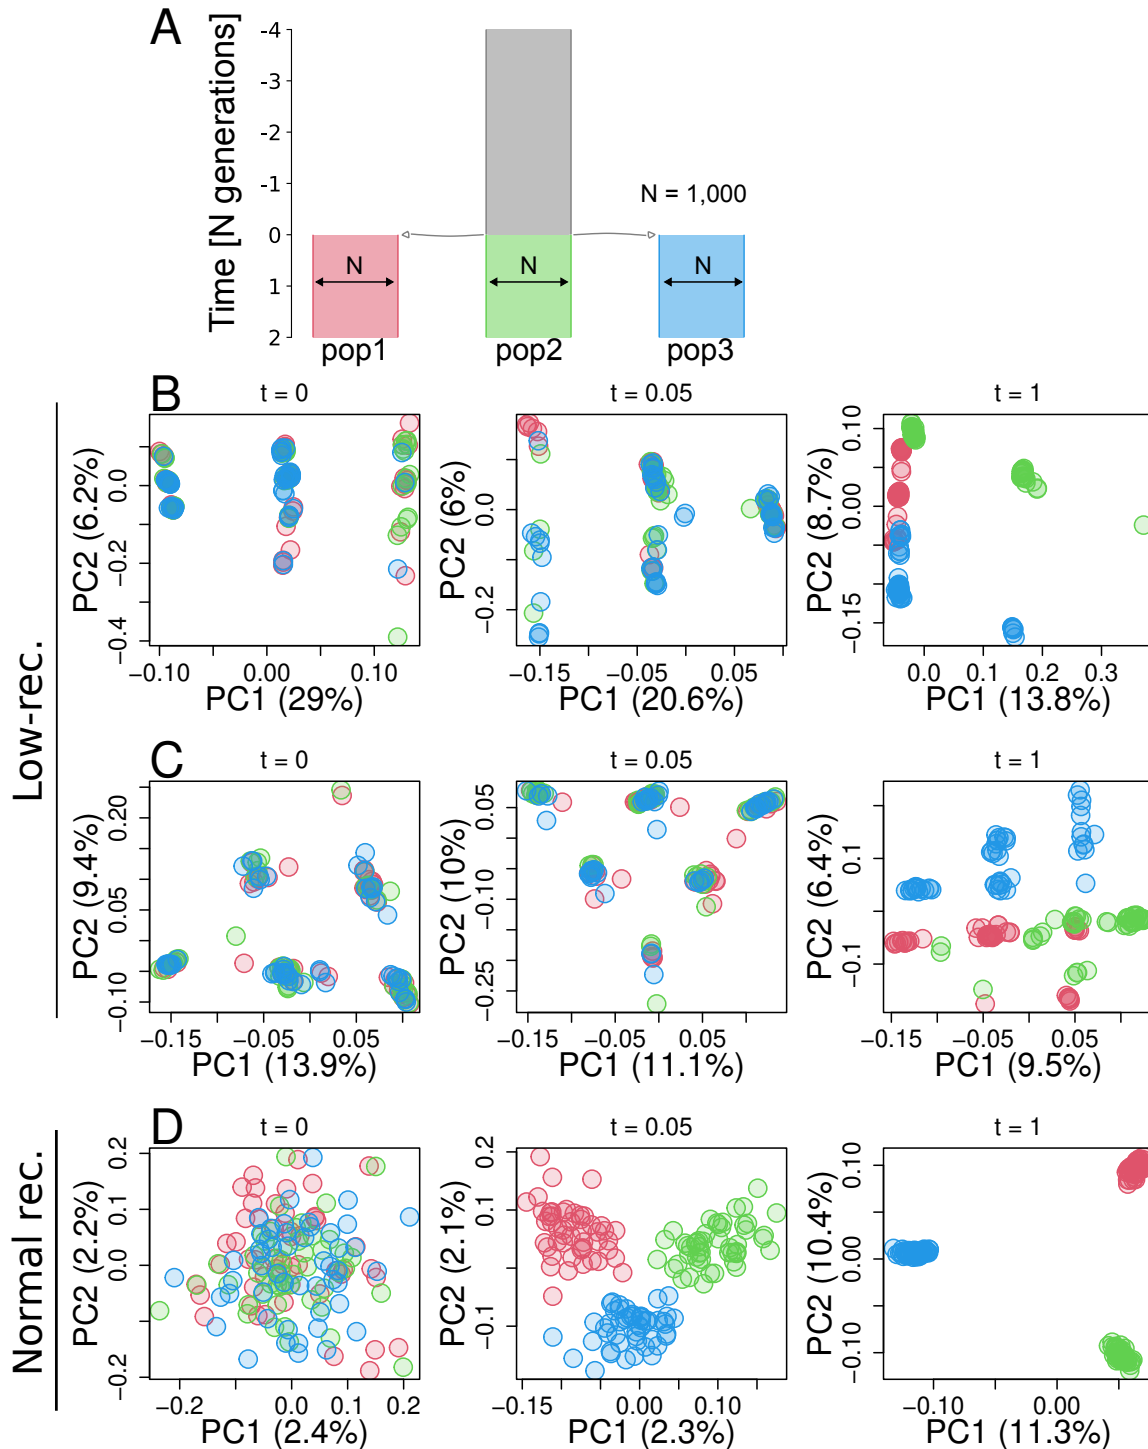

**Figure 4: Simulation of a species-wide low-recombining region.** **A.** Simulated demography scenario. Our simulated genome contained two chromosomes, one with a low-recombining region and the other without. **B, C.** PCA showing patterns of genetic variation at the species-wide low-recombining region at three time points in three exemplified simulation replicates. **D.** PCA showing patterns of genetic variation at a normally recombining chromosome at three time points in the same replicates as **B.**

197 Second, to investigate the effects of population-specific reduction in local recombination  
198 rate, we performed forward simulations. Three populations (pop1, pop2, and pop3) and  
199 their ancestral population had 1,000 diploid individuals, and pop1 evolved a reduced local  
200 recombination rate. We considered two cases with respect to when the population-specific  
201 reduction in recombination rate is introduced: before or after differentiation of populations. In  
202 the first scenario (Sup. Fig. 26), recombination suppression was introduced at the same time  
203 as the three populations split, while in the second scenario (Fig. 5A) recombination suppression  
204 was introduced 4,000 generations after the split. We conducted PCA in genomic regions  
205 with and without population-specific recombination suppression using individuals sampled  
206 over time. In both scenarios, the genomic region with population-specific recombination  
207 suppression transiently showed distinct patterns of genetic variation (Fig. 5B, Sup. Fig. 26B)  
208 resembling the empirical results, while regions without population-specific suppression showed  
209 population structure (Fig. 5C). Haplotype structure was not as conspicuous as in species-wide  
210 low-recombining regions (Sup. Fig. 27B, F, c.f. Sup. Fig. 25) due to standing genetic  
211 variation. Mutations originating in the non-recombining population were enriched in the set  
212 of mutations that have the greatest contribution to the distinct pattern of PCA (Sup. Fig.  
213 27C, G.  $\chi^2$  tests, p-value =  $1.14 \times 10^{-12}$  for model 1 and p-value =  $2.30 \times 10^{-32}$  for model  
214 2). These mutations were significantly associated with each other in the underlying genealogy  
215 sharing common branches compared to other mutations originating in the same population  
216 (Sup. Fig. 27D, H. [Materials and Methods](#), Kolmogorov-Smirnov tests, p-value =  $7.74 \times 10^{-6}$   
217 for model 1 and p-value = 0.0012 for model 2), indicating that the distinct pattern of genetic  
218 variation represents sets of mutations that occurred in ancestral haplotypes. Associations  
219 between these population-specific mutations on ancestral haplotypes would have eventually  
220 decayed by recombination events, but in the low-recombining population the association was  
221 maintained due to suppressed recombination, resulting in the cryptic haplotype structure.

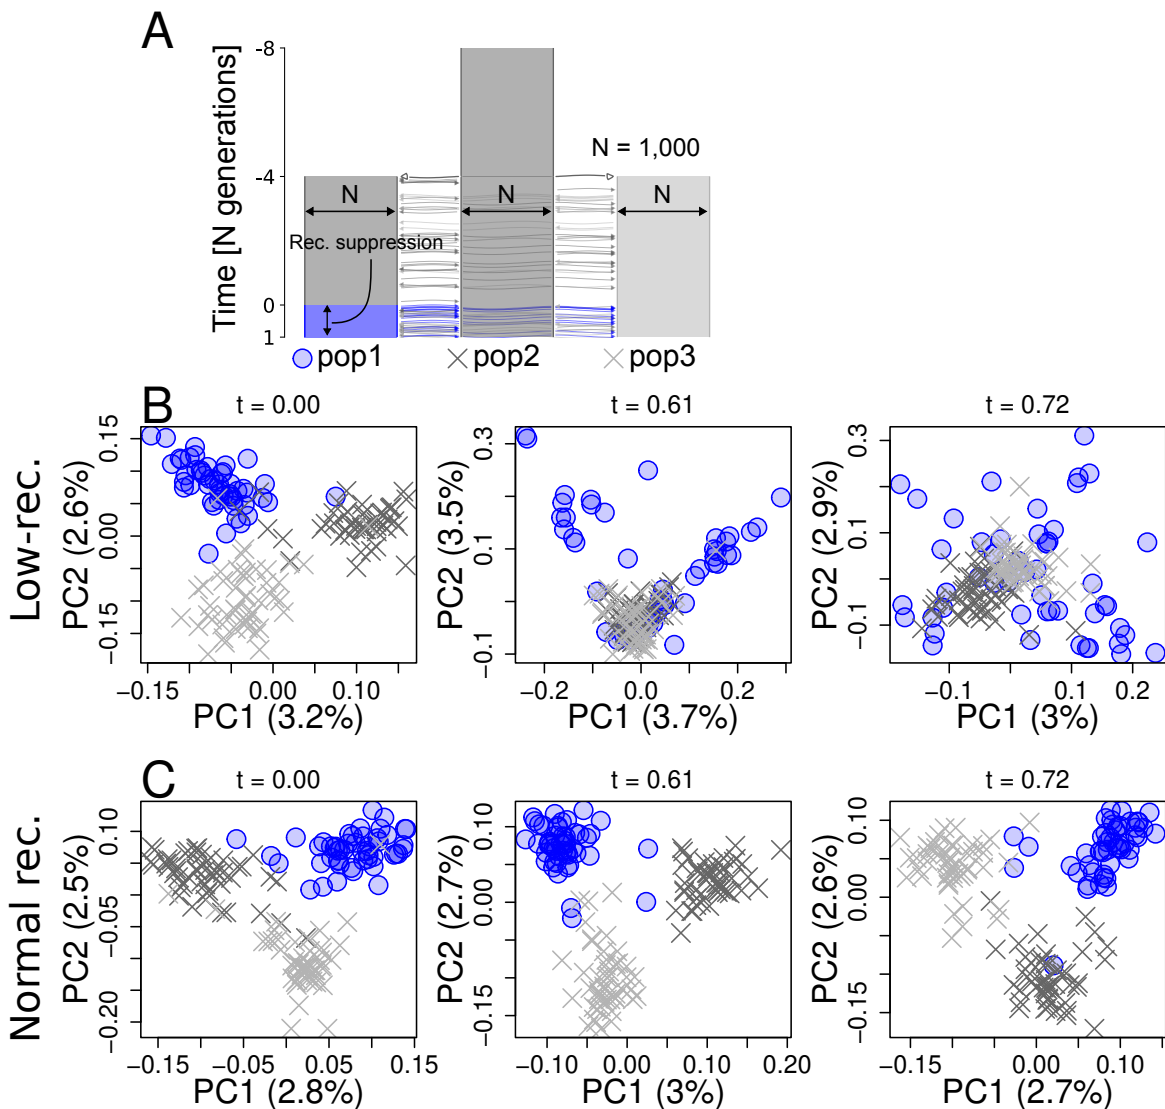

**Figure 5: Simulation of a population-specific low-recombining region.** **A.** Simulated scenario. Simulated genome contained two chromosomes, one with a population-specific low-recombining region and the other without. **B, C.** PCA showing patterns of genetic variation at the population-specific low-recombining region (**B**) and the normally recombining chromosome (**C**) at three time points in one exemplified simulation replicate.

## 222 Effect of selection on patterns of genetic variation

223 Selection is known to cause distinct patterns of genetic variation (Nielsen, 2005). To test  
 224 whether the outlier regions based on *lostruct* identified in the blackcap genome are also  
 225 targets of selection, we measured nucleotide diversity ( $\pi$ ) and Tajima's D in each population,  
 226 as well as ratio between non-synonymous and synonymous substitutions ( $d_N/d_S$ ) for annotated  
 227 genes. Many species-wide low-recombining regions showed reduced nucleotide diversity (Sup.

228 Fig. 29) and Tajima's D (Sup. Fig. 28), suggesting that they are under either positive or  
229 purifying selection. Most genes within outlier regions had  $d_N/d_S$  below 0 (Sup. Fig. 30) with  
230 a few genes with positive  $d_N/d_S$ , indicating that most genes are under purifying selection and  
231 a few others are under positive selection. Furthermore, sequence analysis indicated that some  
232 but not all species-wide low-recombining outlier regions coincide with putative pericentromeric  
233 regions with enrichment of long tandem repeats (Sup. Figs. 33, 34). These results indicate  
234 that the outlier regions may experience effects of selection in addition to reduced recombination  
235 rates.

236 We asked whether the distinct patterns of local genetic variation at the outlier regions  
237 observed in blackcaps represent the effect of selection instead of reduced recombination rates.  
238 Specifically, we addressed whether the distinct patterns of genetic variation representing  
239 haplotype structure could be caused by (i) purifying or (ii) positive selection alone or if they  
240 primarily represent the effect of reduced recombination rate. To this end, we used SLiM  
241 to simulate purifying and positive selection with and without reduction in recombination  
242 rate, and investigated local genetic variation over time by PCA. First, to investigate the  
243 effect of purifying selection, we simulated two chromosomes with and without a species-wide  
244 low-recombining region under the same demographic history as the neutral scenario (Fig. 4A)  
245 but with different strength of purifying selection by introducing mutations with different ratios  
246 between the rates of neutral and deleterious mutations ([Materials and Methods](#)). Distinct  
247 patterns of genetic variation representing haplotype structure evolved only in scenarios where  
248 recombination rate was reduced irrespective of the distribution of fitness effects (DFE) (Sup.  
249 Fig. 31). Stronger purifying selection (DFE with more frequent deleterious mutations in our  
250 simulation) decreased the time for distinct patterns of genetic variation at low-recombining  
251 regions to be overtaken by population structure (Sup. Fig. 31A, C). Second, to investigate  
252 the effect of positive selection, we simulated a chromosome with or without a species-wide  
253 low-recombining region under the same demographic history, and introduced a beneficial  
254 mutation 100 generations after the population split in one population (Sup. Fig. 32A) or 100  
255 generations before the split in the ancestral population (Sup. Fig. 32D). For simulations in  
256 which the beneficial mutation persisted, we recorded the patterns of local genetic variation by

257 PCA over time. Although positive selection affected patterns of genetic variation compared to  
258 the neutral scenario, distinct patterns of genetic variation representing discrete haplotypes were  
259 unique to scenarios with reduced recombination rate in both cases (Sup. Fig. 32B-E). These  
260 results indicate that distinct patterns of genetic variation represented in local PCA, as in the  
261 blackcap outlier regions, primarily reflect haplotype structure due to reduced recombination  
262 rate, on which the effect of selection can be overlaid.

## 263 Discussion

### 264 Distinct patterns of genetic variation at low-recombining regions: Genealogical 265 interpretations

#### 266 Genealogical noise, genealogical bias, and mutational noise

267 A number of empirical population genomics studies have identified ecologically and evolution-  
268 arily important genomic regions by locating outlier regions with distinct patterns of genetic  
269 variation (Jones et al., 2012; Lamichhaney et al., 2016; Lawniczak et al., 2010; Lundberg et  
270 al., 2021; Malinsky et al., 2015). Genomic windows in such studies are assumed to be both  
271 large enough to eliminate the effect of random fluctuation in local genetic variation and small  
272 enough to capture the localised signatures of selection. We showed empirically that genomic  
273 regions with distinct patterns of genetic variation identified by a population genomic scan  
274 based on principal component analysis (PCA) highly overlap with low-recombining genomic  
275 regions (Fig. 2). With simulations, we showed that although selection may affect the amount  
276 and pattern of local genetic variation around the target locus, the distinct patterns of genetic  
277 variation represented by PCA at low-recombining regions can be primarily explained by  
278 haplotype structure due to reduced recombination rate (Figs. 4, 5). We discuss our findings  
279 from the perspective of underlying genealogies.

280 We first define three terms: (1) genealogical noise, (2) genealogical bias, and (3) mutational  
281 noise. (1) By “genealogical noise” we refer to the fact that gene genealogies vary along the  
282 genome following a null distribution given a population history (Dutheil et al., 2009; Martin  
283 & Van Belleghem, 2017; McVean & Cardin, 2005; Wakeley, 2008, 2020; Wiuf & Hein, 1999).

284 (2) By “genealogical bias” we refer to the fact that selective processes can systematically shift  
285 the distribution of local genealogies away from the null distribution. For example, genealogies  
286 under positive selection, selection against gene flow, adaptive introgression, and balancing  
287 selection are biased due to bursts of coalescence, faster lineage sorting, and introduction and  
288 maintenance of long branches (Barton & Etheridge, 2004; Guerrero et al., 2012; Hejase et al.,  
289 2020; Martin et al., 2019; Setter et al., 2020; Speidel et al., 2019; Taylor, 2013). On top of  
290 these, (3) randomness in the process of mutation causes additional noise in realised genetic  
291 variation (Ralph et al., 2020), which we call “mutational noise”. For example, the first and  
292 the second halves of a chromosomal interval with a single genealogy can still have slightly  
293 different patterns of genetic variation because they represent some finite numbers of different  
294 mutations.

### 295 **Species-wide low-recombining regions**

296 We showed in blackcaps that some distinct patterns of genetic variation are associated with  
297 species-wide low-recombining regions (Fig. 2). This is in line with previous studies reporting  
298 negative correlation between recombination rate and genetic differentiation (Burri et al., 2015;  
299 Burri, 2017; Delmore et al., 2015, 2018; Irwin et al., 2018; Kawakami et al., 2017; Roesti et al.,  
300 2013; Rougemont et al., 2021; Van Doren et al., 2017). To investigate what factors affect distinct  
301 patterns of genetic variation at low-recombining regions (Fig. 3) in more detail, we performed  
302 simulations of low-recombining regions with and without selection, and demonstrated that  
303 haplotype structure underlies the distinct patterns which persists only transiently until the  
304 effect of the population structure emerges (Figs. 4, 5). This transiency reflects a shift from  
305 local genetic variation primarily representing haplotype structure (Lotterhos, 2019; Ma &  
306 Amos, 2012) to that representing population structure, which can be interpreted based on the  
307 underlying genealogies. Low-recombining regions have few underlying genealogies per interval  
308 of a fixed physical length and haplotype structure at such regions tends to reflect their basal  
309 branches because basal branches tend to be longer than peripheral branches (Wakeley, 2008).  
310 At a time point soon after a population split event, peripheral branches covering more recent  
311 times than the population split harbour fewer mutations than basal branches. Therefore, the  
312 realised pattern of genetic variation at this stage has the greatest contributions by mutations

313 on the long basal branches undifferentiated among populations (i.e. consisting standing genetic  
314 variation), representing a few ancestral haplotypes that descend the current sample. As time  
315 passes after the population split, the proportion of mutations that have occurred after the  
316 population split increases while some ancestral haplotypes can be lost by chance (i.e. drift),  
317 increasing the contribution of population structure on genetic variation. This type of distinct  
318 patterns of genetic variation arises predominantly in low-recombining regions but less so in  
319 normally recombining regions. This is because haplotype structure representing a few ancestral  
320 lineages would become less prominent with recombination as different segments of a current  
321 haplotype can follow distinct ancestries and thus the genealogical noise is effectively averaged  
322 out.

323         Some low-recombining regions may have genealogies with much shorter basal branches than  
324 other low-recombining regions because the variance in the basal branch length is greater than  
325 peripheral branches (Wakeley, 2008). The over-representation of a few ancestral haplotypes  
326 in genetic variation requires long basal branches in the underlying genealogies, and thus  
327 low-recombining regions with relatively short basal branches cannot accommodate sufficient  
328 mutations to represent distinct ancestral haplotypes. This decreases the relative contribution of  
329 genealogical noise compared to mutational noise (Supplementary Notes 1.1). Distinct patterns  
330 of genetic variation with varying levels of clustering of individuals in PCA in our empirical  
331 results (Sup. Fig. 6) may correspond to different ratios between genealogical and mutational  
332 noise due to large variance in the basal branch lengths of underlying genealogies. Specifically,  
333 some outlier regions with mixture of individuals from multiple populations without distinct  
334 clusters and population subdivision in PCA may have underlying genealogies with short basal  
335 branches leading to greater contributions of mutational noise on the realised genetic variation.

### 336 **Population-specific low-recombining regions**

337 We both empirically and with simulations showed that population-specific low-recombining  
338 regions exhibit distinct patterns of genetic variation in which individuals of low-recombining  
339 and normally recombining populations have different variance in genetic distances (Fig. 3C,  
340 Fig. 5). This unequal variance in low-recombining and normally recombining populations can



341 be interpreted based on the underlying genealogies (Sup. Fig. 35). We consider the ancestry  
342 of current samples of low-recombining and normally recombining populations and split the  
343 ancestry at the time  $T$  when the population-specific recombination suppression initiated (Sup.  
344 Fig. 35A). At time  $T$ , there were  $n_1$  and  $n_2$  ancestral haplotypes that descend all current  
345 samples in low-recombining and normally recombining populations. At times older than  $T$ ,  
346 the ancestors of the  $n_1$  and  $n_2$  haplotypes may freely recombine within each set, making the  
347 genetic distances among ancestral haplotypes within each population close to equidistant (Sup.  
348 Fig. 35B). After the initiation of the population-specific reduction in recombination rate, the  
349 ancestry of one current sequence of the low-recombining population can be traced back to either  
350 one of the  $n_1$  ancestral haplotypes present at the time  $T$  (Sup. Fig. 35A). On the contrary, the  
351 ancestry of one current sequence of the normally recombining population can be traced back  
352 to multiple ancestral haplotypes of the  $n_2$  sequences because of the presence of recombination  
353 (Sup. Fig. 35A). From the perspective of mutations, in the low-recombining population,  
354 mutations that arose on the same haplotype tend to be linked until the present time because  
355 of the suppressed recombination. On the other hand, in the normally recombining population,  
356 mutations that arose on the same ancestral haplotype less likely stay linked until the present  
357 time because recombination can dissociate them. Because shuffling of haplotypes reduces the  
358 variance of genetic distances among sequences, population-specific reduction in recombination  
359 rates leads to greater variance in low-recombining population than in normally recombining  
360 population as observed in our empirical results and simulations. In short, because of the  
361 different recombination rates between the populations, genealogical noise is more efficiently  
362 eliminated in the normally recombining population than in the low-recombining population.

363 The haplotype structure at population-specific low-recombining region is only cryptic and  
364 less apparent than in species-wide low-recombining regions because other standing mutations  
365 coexist on the same haplotype, which are older than the initiation of the population-specific  
366 recombination suppression (Sup. Fig. 27). The elevated PC loadings at linked mutations  
367 originating in the low-recombining population could be informative to study evolutionary change  
368 in local recombination rate: the ages of such mutations mapped on inferred genealogies might  
369 be useful to estimate the timing at which the population-specific recombination suppression

370 initiated.

371 In our empirical analyses in blackcaps, we detected the effect of population-specific  
372 reduction of recombination rate in Azores and Cape Verde island populations (Fig. 3C, Sup.  
373 Fig. 7). It remains unclear why reduced recombination rate in certain populations but not  
374 others is reflected as distinct patterns of genetic variation by `lostruct`. The recent split of  
375 Azores and Cape Verde populations from other populations, accompanied by reduction in  
376 population size and the level of isolation (Delmore et al., 2020b) may have contributed to  
377 more efficient spread of reduced recombination rate.

### 378 **Recombination landscape as a driver of evolution of local genetic variation**

379 Species-wide and population-specific recombination suppression underlying distinct patterns  
380 of local genetic variation are probably not independent: reduction in recombination rates that  
381 initiates formation of haplotype blocks likely originates from one population and may spread  
382 to multiple populations. For example, local recombination rate may be initially reduced in  
383 one population in which a segregating inversion originates before it may spread in multiple  
384 populations by gene flow (Faria et al., 2019). In line with this view of recombination map as an  
385 evolvable trait diverging across populations according to subdivision, recent studies find that  
386 divergence in local recombination rate among populations is correlated with genetic divergence  
387 (Bascón-Cardozo et al., 2022a; Roesti et al., 2013; Spence & Song, 2019). Future work on the  
388 effects of transition from population-specific to species-wide suppression of recombination will  
389 fill the gap between the two states.

390 Besides spread of recombination suppression across populations, there are other paths  
391 along which patterns of local genetic variation may change over time. First, change in  
392 frequency of one haplotypic variant by drift or gene flow and selection and accumulation  
393 of novel mutations may shift the distinct pattern of genetic variation (Rubin et al., 2022).  
394 Second, an increase in recombination rate in the region may resolve the distinct pattern of  
395 genetic variation and result in emergence of the population structure, because recombination  
396 breaks down discrete haplotypes and generates mixed types whereby reducing the variance  
397 of genetic variation (Hudson, 1983). These two types of shifts in distinct patterns of genetic

398 variation are not mutually exclusive. For example, fixation of an inversion results in elevated  
399 recombination rate (Smukowski Heil et al., 2015; Stevison et al., 2011) because there are  
400 no longer non-recombining heterozygotes in the population. Due to resumed recombination,  
401 patterns of local genetic variation in such regions are expected to reflect population structure  
402 eventually. The question of how long it takes for an outlier region with distinct patterns of  
403 genetic variation to disappear after these events should be focally studied in the future.

404 In Fig. 6A, we illustrate a model for the evolution of local genetic variation that changes  
405 according primarily to the evolution of local recombination rates. Local genetic variation  
406 can become distinct from the population structure first by representing emerging haplotype  
407 structure associated with population-specific recombination suppression or other types of  
408 haplotype blocks (e.g. inversions) in one population. If this recombination suppression spreads  
409 throughout all populations, then local genetic variation will start to reflect species-wide  
410 haplotype structure. Once the relative contribution of haplotype structure on local genetic  
411 variation is reduced by differentiation or disappears by elevated recombination rates, then  
412 genetic variation returns to reflect the population structure and consequently the outlier  
413 region disappears. The effect of selection on local genetic variation may be overlaid on top  
414 (Supplementary Notes 1.2).

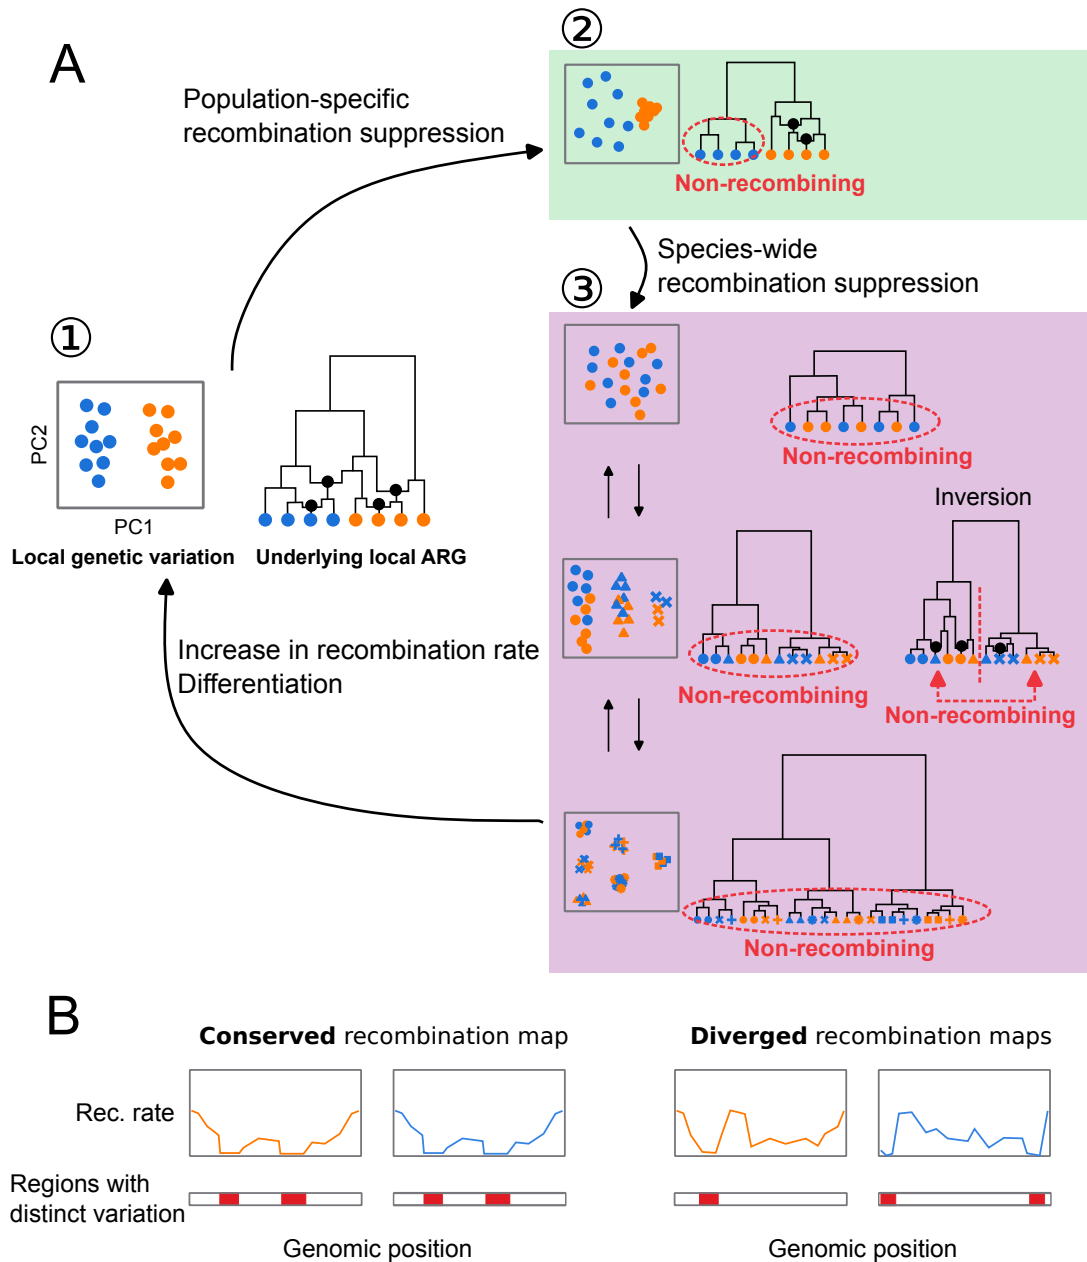

**Figure 6: Evolutionary changes in local recombination rate influence evolution of local genetic variation.** **A.** Local genetic variation is shown in hypothetical PCA plots. Their underlying genealogies are shown in simplified ancestral recombination graphs (ARGs, (Griffiths & Marjoram, 1997; reviewed in Lewanski et al., 2024)), on which black dots represent ancestral recombination events contributing to the sampled sequences. Points in PCA depict diploid individuals, while those on the ARGs represent haploid sequences. Two colours of these points (blue and orange) indicate two populations. (1) Local genetic variation concordant to population structure. Genetic variation shows separation of individuals from two populations. ARG shows that recombination is suppressed in neither population. (2) Population-specific recombination suppression in the blue population. ARG shows that recombination is suppressed in the blue population. (3) Species-wide recombination suppression. Top: A case in which there are few mutations representing the basal splits of the underlying genealogy at species-wide low-recombining region. Middle: A case in which there are two haplotypic variants at the species-wide low-recombining region. If this is due to presence of an inversion (right ARG), recombination is suppressed between but not within the two clades representing two alleles. Bottom: A case in which there are three haplotypic variants at the species-wide low-recombining region. **B** Evolution of recombination map influences difference in genomic distributions of distinct patterns of genetic variation between species/populations.

## 415 Implications

416 Finally, we discuss technical and biological implications of our study. The technical implication  
417 concerns interpretation of genome scans based on local genetic variation. A number of methods  
418 based on local genetic variation have been used to detect loci involved in different kinds of  
419 selective processes. For example,  $F_{ST}$  (differentiation),  $d_{XY}$  (divergence), and other population  
420 parameters are inferred to detect genomic islands of speciation (Delmore et al., 2018; Hejase  
421 et al., 2020; Huang et al., 2020; Malinsky et al., 2015). Reduced diversity ( $\pi$ ) is a signature of  
422 selection (Delmore et al., 2018; Irwin et al., 2018; Pracana et al., 2017), and by combining it  
423 with variation among populations, loci associated with population-specific selection can be also  
424 inferred (Yi et al., 2010). Targets of adaptive introgression have been identified by applying  
425 statistics based on ABBA-BABA test, which is related to genetic variation (Peter, 2016, 2022),  
426 in sliding windows (Kronforst et al., 2013; Martin et al., 2015; Patterson et al., 2012; Reich et  
427 al., 2009). However, there are confounding factors that affect inference of these statistics. For  
428 example, it has been shown that low diversity can cause elevation in some of these statistics  
429 (Cruickshank & Hahn, 2014; Noor & Bennett, 2009). In addition to reduced diversity, this  
430 study and others (Booker et al., 2020; Lotterhos, 2019; Renaut et al., 2013) show that reduced  
431 recombination rate also causes distinct patterns of genetic variation which can lead to erroneous  
432 identification of regions under influence of selective factors. Examining recombination rates  
433 at identified regions and comparing them to other regions are necessary to avoid this. For  
434 instance, apparent outliers in only few (pairs of) populations at a low-recombining region may  
435 reflect high variance, while high variance at low-recombining regions alone cannot explain  
436 signals occurring in many (quasi-) independent populations or species at a low-recombining  
437 region. Furthermore, corroborating methods based on different aspects of distinct patterns of  
438 variation, such as site frequency spectrum (DeGiorgio et al., 2016; Fay & Wu, 2000; Tajima,  
439 1989), LD (Sabeti et al., 2002, 2007; Voight et al., 2006), inferred genealogies (Hejase et al.,  
440 2020; Speidel et al., 2019; Stern et al., 2019), local landscape of variation (Setter et al., 2020),  
441 and sites of mutations in genes (Nei & Gojobori, 1986), as well as approaches with explicit  
442 simulation based on inferred demography (Hager et al., 2022), may be informative.

443 The biological implication is about evolution of recombination rates and genetic variation

444 along the genome. Based on our findings of a link between these, we predict that organisms  
445 with more conserved recombination landscape along the genome may have more conserved  
446 genomic landscapes of distinct patterns of genetic variation (Fig. 6B). In other words, the  
447 more conserved recombination maps are, the more correlated genomic distribution of distinct  
448 genetic variation may be between species. In vertebrates including placental mammals (with  
449 some exceptions), recombination landscape along the genome evolves fast due to continuous  
450 turnovers of alleles of PRDM9 (the gene coding a protein that determines recombination hot  
451 spots) and its target DNA sequences (Baudat et al., 2010; Myers et al., 2008). For instance,  
452 in mammals that possess functional PRDM9, the genomic landscape of recombination rates is  
453 distinct between and even within species (Kong et al., 2010; Spence & Song, 2019; Stevison  
454 et al., 2016). Importantly, PRDM9 has been pseudogenised (Birtle & Ponting, 2006) or lost  
455 (Baker et al., 2017) independently in multiple vertebrate lineages. This shifted the determinants  
456 of recombination map from the PRDM9 allele and its target to genomic features such as CpG  
457 islands and transcription start sites, stabilising the recombination landscape (Auton et al.,  
458 2013; Baker et al., 2017; Singhal et al., 2015). Our results shown in birds, a group lacking  
459 PRDM9 (Birtle & Ponting, 2006; Singhal et al., 2015), raises a question whether the evolution  
460 of local recombination rates may play an even more important role in shaping local genetic  
461 variation in organisms with functional PRDM9. Comparative studies using taxa with and  
462 without functional PRDM9 will address this and may link the evolution of genomic landscape  
463 of distinct patterns of genetic variation and (in)stability of recombination maps.

## 464 **Materials and Methods**

### 465 **Empirical analyses**

#### 466 *de novo* genome assembly

467 A chromosome-level blackcap reference genome was *de novo* assembled within the Vertebrate  
468 Genomes Project (VGP), following pipeline version 1.5 (Rhie et al., 2021). In brief, blood  
469 of a female blackcap from the resident Tarifa population in Spain was collected in 100%  
470 ethanol on ice and stored at -80 °C (NCBI BioSample accession SAMN12369542). The ethanol

471 supernatant was removed and the blood pellet was resuspended in Bionano Cell Buffer in  
472 a 1:2 dilution. Ultra-long high molecular weight (HMW) DNA was isolated using Bionano  
473 agarose plug method (Bionano Frozen Whole Nucleated Blood Stored in Ethanol – DNA  
474 Isolation Guidelines (document number 30033)) using the Bionano Prep Blood and Cell Culture  
475 DNA Isolation Kit. Four DNA extractions were performed yielding a total of 13.5  $\mu$ g HMW  
476 DNA. About 6  $\mu$ g of DNA was sheared using a 26G blunt end needle (PacBio protocol PN  
477 101-181-000 Version 05) to ~40 kb fragments. A large-insert PacBio library was prepared using  
478 the Pacific Biosciences Express Template Prep Kit v1.0 following the manufacturer protocol.  
479 The library was then size selected (>15 kb) using the Sage Science BluePippin Size-Selection  
480 System. The library was then sequenced on 8 PacBio 1M v3 smrtcells on the Sequel instrument  
481 with the sequencing kit 3.0 and 10 hours movie with 2 hours pre-extension time, yielding  
482 77.51 Gb of data (~66.29X coverage) with N50 read length averaging around 22,927 bp. We  
483 used the unfragmented HMW DNA to generate a linked-reads library on the 10X Genomics  
484 Chromium (Genome Library Kit & Gel Bead Kit v2 , Genome Chip Kit v2 , i7 Multiplex  
485 Kit PN-120262). We sequenced this 10X library on an Illumina Novaseq S4 150 bp PE lane  
486 to ~60X coverage. Unfragmented HMW DNA was also used for Bionano Genomics optical  
487 mapping. Briefly, DNA was labeled using the Bionano Prep Direct Label and Stain (DLS)  
488 Protocol (30206E) and run on one Saphyr instrument chip flowcell. 136.31 Gb of data was  
489 generated (N50 = 301.9kb with a label density = 16.91 labels/100kb). Optical maps were  
490 assembled using Bionano Access (N50 = 27.48 Mb and total length = 1.41 Gb). Hi-C libraries  
491 were generated by Arima Genomics and Dovetail Genomics and sequenced on HiSeq X at ~60X  
492 coverage following the manufacturer’s protocols. Proximally ligated DNA was produced using  
493 the Arima-HiC kit v1 , sheared and size selected (200 – 600 bp) with SRI beads, and fragments  
494 containing proximity-ligated DNA were enriched using streptavidin beads. A final Illumina  
495 library was prepared using the KAPA Hyper Prep kit following the manufacturer guidelines.  
496 FALCON v1.9.0 and FALCON unzip v1.0.6 were used to generate haplotype phased contigs,  
497 and purge\_haplotigs v1.0.3 was used to further sort out haplotypes (Guan et al., 2020). The  
498 phased contigs were first scaffolded with 10X Genomics linked reads using scaff10X 4.1.0  
499 software, followed with Bionano Genomics optical maps using Bionano Solve single enzyme  
500 DLS 3.2.1, and Arima Genomics in-vitro cross-linked Hi-C maps using Salsa Hi-C 2.2 software

501 (Ghurye et al., 2019). Base call errors were polished with both PacBio long reads and Arrow  
502 short reads to achieve above Q40 accuracy (no more than 1 error every 10,000 bp). Manual  
503 curation was conducted using gEVAL software by the Sanger Institute Curation team (Howe  
504 et al., 2021). Curation identified 33 autosomes and Z and W chromosomes (plus 1 unlocalised  
505 W). Autosomes were named in decreasing order of size, and autosomes 1 through 30 and sex  
506 chromosomes had counterparts in the commonly used VGP reference zebra finch assembly  
507 (Sup. Table 2). The total length of the primary haplotype assembly was 1,066,786,587 bp,  
508 with 99.14% assigned to chromosomes. The final 1.1 Gb assembly consisted of 601 contigs in  
509 189 scaffolds, with a contig N50 of 7.4 Mb, and scaffold N50 of 73 Mb, indicating a high-quality  
510 assembly that fulfills the VGP standard metrics.

## 511 **Whole-genome resequencing**

512 We resequenced 69 blackcap samples from various populations across the species distribution  
513 range (Sup. Table 1) to complement an existing dataset of 110 blackcaps, 5 garden warblers,  
514 and 3 African hill babblers that had been sequenced previously (Delmore et al., 2020b).  
515 Blood samples from the additional 69 blackcaps were collected from the brachial vein and  
516 stored in 100% ethanol. High molecular weight genomic DNA was extracted with a standard  
517 salt extraction protocol or through the Nanobind CBB Big DNA Kit Beta following the  
518 manufacturer's instructions. Libraries for short insert fragments between 300 and 500 bp were  
519 prepared and were then sequenced for short paired-end reads on either Illumina NextSeq 500,  
520 HiSeq 4000 or NovaSeq 5000 (Sup. Table 1).

521 We performed quality control of the reads with FastQC version 0.11.8 (<https://www.bioinformatics.babraham>)  
522 Reads from all samples were mapped against the blackcap reference genome following an  
523 adjusted pipeline of **Genome Analysis Toolkit** (GATK version 4.1.7.0, McKenna et al. (2010))  
524 and **Picard** version 2.21.9 (<http://broadinstitute.github.io/picard/>). After resetting the base  
525 quality of adapter bases in the sequenced reads to 2 with **Picard MarkIlluminaAdapters**,  
526 paired-end reads were mapped to the reference using **BWA mem** (Li, 2013). To ensure that both  
527 unmapped mates and secondary/supplementary reads were marked for duplicates, we ran  
528 **Picard MarkDuplicates** for sorted reads with the default pixel distance of 100 for reads



529 from Illumina NextSeq 500 or with a pixel distance of 2,500 for reads from HiSeq 4000 and  
530 NovaSeq 5000. Due to low coverage, 10 samples (Sup. Table 1) were sequenced multiple times.  
531 Alignment files for these samples (in BAM format) were merged with `Picard MergeSamFiles`.  
532 Per-sample quality control of BAM files were performed using `QualiMap` version 2.2.1  
533 (Okonechnikov et al., 2016), `Picard CollectMultipleMetrics`, `CollectRawWgsMetrics`  
534 and `CollectWgsMetrics`; and `MultiQC` version 1.8 (Ewels et al., 2016). The minimum and  
535 median depth were 7.8X and 20.1X, and the minimum and median coverage were 0.88  
536 and 0.97. We called bases at all positions per sample using `GATK HaplotypeCaller`. We  
537 combined gVCF files of 189 individuals into ten evenly sized subsets (to allow parallelisation  
538 of the following variant calling step) with `GATK CombineGVCFs`. We genotyped SNPs and  
539 INDELS using `GATK GenotypeGVCFs`, and the 10 subsets were concatenated using `Picard`  
540 `GatherVcfs` into one VCF file covering the entire genome. From the VCF file, SNPs were  
541 selected (i.e. indels were excluded) using `GATK SelectVariants`, after which we filtered SNPs  
542 with the following criteria:  $QD < 2.5$ ;  $FS > 45.0$ ;  $SOR > 3.0$ ;  $MG < 40$ ;  $MQRankSum <$   
543  $-12.5$ ;  $ReadPosRankSum < -8.0$ . We removed garden warblers and African hill babblers  
544 from the multi-species VCF and kept only biallelic sites. We estimated blackcap haplotypes  
545 using `SHAPEIT2` (r837) (Delaneau et al., 2013) with the blackcap recombination map  
546 (Bascón-Cardozo et al., 2022a), yielding 142,083,056 SNPs.

## 547 **Genome-wide PCA**

548 To characterise the population structure of blackcaps, we performed principal component  
549 analysis (PCA) using `PLINK` (Purcell et al., 2007).

## 550 **Local PCA**

551 To identify genomic regions with distinct patterns of genetic variation in blackcaps, we  
552 performed local PCA in sliding genomic windows of 1,000 SNPs and summarised dissimilarity  
553 of windows by multidimensional scaling using `lostrct` (Li & Ralph, 2019) in R version  
554 3.5.3. First, we prepared a genotype and a haplotype table for each chromosome in which  
555 rows and columns represented positions and individuals from the phased VCF file using  
556 `BCFtools`. Specifically, genotypes were encoded 0, 1, and 2 for the reference allele homozygotes,

557 heterozygotes, and non-reference allele homozygotes in the genotype table, and 0 and 2 for the  
558 reference and the non-reference allele in the haplotype table (encoding 0 and 1 instead of 0  
559 and 2 in haplotype-based analysis gives the same results). Chromosomes shorter than 10 Mb  
560 were concatenated to avoid misidentification of short chromosomal background as an outlier  
561 region. Distance matrices of windows were computed based on the coordinates (PC1 and PC2)  
562 of samples (individuals for genotype-based local PCA, and haplotype for haplotype-based  
563 local PCA) within R using `lostruct`. Multidimensional scaling (MDS) was performed to  
564 summarise similarities of local genetic variation patterns among windows into 20 axes (MDS1  
565 through MDS20).

566 Using the `lostruct` output, we identified chromosomal intervals with distinct patterns  
567 of genetic variation. In each chromosome, windows with MDS value apart from the mode  
568 of the distribution by greater than 0.3 for any one of the 20 axes were defined as outlier  
569 windows. This threshold was determined by visualising the distribution of MDS values in each  
570 chromosome (Sup. Fig. 2). For each MDS axis, we defined genomic intervals with at least  
571 five outlier windows longer than 100 kb as “outlier regions” with distinct patterns of genetic  
572 variation. Overlapping intervals across different MDS axes as well as intervals identified based  
573 on genotypes and haplotypes were merged using `BEDtools`. To verify that the outliers show  
574 pattern of genetic variation distinct from the whole-genome PCA, we performed PCA using  
575 all SNPs within each outlier region using `PLINK`. Genomic regions showing similar pattern to  
576 the whole genome PCA were identified with visual inspection and discarded from the outliers.

577 To assess consistency between the pipelines using genotypes and haplotypes, we compared  
578 MDS results of genotype- and haplotype-based `lostruct`. We calculated Euclidean distance of  
579 windows from the centre of the 20 dimensional space to enable comparison of the same window  
580 in genotype- and haplotype-based MDS. We measured this distance instead of comparing  
581 the coordinates directly to account for possible rotations of MDS patterns between genotype-  
582 and haplotype-based `lostruct`. Because dissimilarity of windows in terms of the pattern  
583 of genetic variation was computed per chromosome, we calculated correlation of the above  
584 distance between genotype- and haplotype-based methods per chromosome. The comparison  
585 of genotype-based and haplotype-based `lostruct` is in Sup. Fig. 4.

586 To assess whether `lostruct` can identify outliers irrespective of presence/absence of  
587 other outliers on the same chromosome as well as the chromosome length, we ran `lostruct`  
588 treating either one part of a blackcap chromosome (“split chromosomes”) or multiple blackcap  
589 chromosomes as a single chromosome (“joined chromosome”). If `lostruct` is robust to the  
590 chromosomal background, it is expected that the same regions should be detected as outliers  
591 with distinct patterns of genetic variation in both split and joined chromosomes compared  
592 to per-chromosome results. We prepared four split chromosomes by splitting chromosomes  
593 1 and 2 at the middle, and one joined chromosome by concatenating chromosomes 20, 21,  
594 and 28. We performed `lostruct` analysis based both on genotype and haplotype and merged  
595 the identified regions. The comparison of `lostruct` between using single chromosomes and  
596 split/joined chromosomes is in Sup. Fig. 5.

#### 597 **LD and recombination landscape**

598 To calculate LD around outlier regions, we first extracted SNPs within and 30% length outside  
599 each outlier. We then thinned SNPs so that all neighbouring SNP positions were at least 10  
600 kb away from each other. Linkage disequilibrium (LD) between all pairs of thinned SNPs was  
601 calculated with `VCFtools` with the `--geno-r2`.

602 We inferred recombination landscape along blackcap chromosomes using `Pyrho` (Spence &  
603 Song, 2019). `Pyrho` infers demography-aware recombination rates with a composite-likelihood  
604 approach from SNPs data of unrelated samples making use of likelihood lookup tables generated  
605 by simulations based on demography and sample size of each population. In all inferences,  
606 we used demography of focal populations inferred in Delmore et al. (2020b). Before the  
607 recombination inference, focal samples were filtered and singletons were removed. We ran  
608 `Pyrho` with mutation rate of  $4.6 \times 10^{-9}$  per site per generation (Smeds et al., 2016), block  
609 penalty of 20, and window size of 50 kb to infer population-level recombination landscape in  
610 Azores, Cape Verde, continental resident, and medium-long distance migrants (represented  
611 by medium distance south-west migrants). We computed mean recombination rate in 10 kb  
612 sliding windows for each population.

613 We defined low-recombining regions and evaluated overlaps between outlier regions and

614 low-recombining regions in the following four steps. 1. define low-recombining regions for  
615 each population recombination map, 2. test for association between all outlier regions and the  
616 low-recombining regions for each population, 3. define species-wide and population-specific  
617 low-recombining regions, and 4. label outlier regions with species-wide or population-specific  
618 low-recombining regions or no overlap with any low-recombining region.

- 619 1. For the recombination map of each of the four populations (med\_sw, cont\_res, Azores,  
620 Cape Verde), we defined low-recombining regions as the set of 10 kb windows with  
621 recombination rate lower than 20 percentile for each chromosome. This mild threshold  
622 was set to account for large variation in the recombination landscapes among chromosomes  
623 and to capture population-specific reduction in recombination rate which could be with  
624 weaker reduction in recombination rate than at species-wide low-recombining regions.
- 625 2. For the set of low-recombining regions of each population, we performed a permutation  
626 test by shuffling observed outlier regions within the chromosome and counted the total  
627 length of overlap with (any) low-recombining regions (in bp) using `BEDTools`. We  
628 repeated this 1,000 times, and compared the empirical null distribution of the overlap  
629 length (in bp) with observed overlaps.
- 630 3. To define species-wide and population-specific low-recombining regions, at all positions  
631 along the genome we counted the number of population recombination maps sharing low-  
632 recombining regions. If a region was labelled low-recombining in three or four populations  
633 at step 1, we defined it to be species-wide low-recombining region. If a region was labelled  
634 low-recombining in one or two populations, we defined it to be a population-specific  
635 low-recombining region, recording which populations were low-recombining.
- 636 4. We first labelled outlier regions overlapping species-wide low-recombining regions. We  
637 intersected the species-wide low-recombining regions defined in step 3 and outlier regions.  
638 We labelled an outlier region with species-wide low-recombining if it had a coverage of  
639 species-wide low-recombining regions greater than 0.5. Two exceptions were outlier\_12\_3  
640 and outlier\_30\_1, which are putative inversions. They had coverage of species-wide  
641 low-recombining regions of 0.30 and 0.23 but this is largely due to heterokaryotype-  
642 specific recombination suppression and inclusion of homokaryotypes in recombination

643 rate inference. Because these putative inversions were segregated in most populations,  
644 we defined them to be species-wide low-recombining regions. We next labelled outlier  
645 regions overlapping population-specific low-recombining regions. We intersected the  
646 population-specific low-recombining region defined in step 3 with outlier regions excluding  
647 those overlapping with species-wide low-recombining regions. We labelled an outlier  
648 region overlapping with population-specific low-recombining regions if it had a coverage  
649 greater than 0.01 for any (pair of) population(s). Finally, the remaining outlier regions  
650 were labelled no reduction in recombination rate.

651 To characterise genotype-specific LD and recombination landscape at the five outlier  
652 regions with three clusters of individuals in PCA, we applied `vcftools --geno-r2` and `Pyrho`  
653 (Spence & Song, 2019) to our empirical data using each genotype (AA, AB, and BB in Sup.  
654 Fig. 11) separately. Validation of this procedure is described in “Simulation: Validation of  
655 LD-based inference of recombination landscape using non-randomly chosen samples”.

## 656 **Inversion breakpoints**

657 Three clusters of individuals observed in PCA with genotype-specific LD at two outlier regions  
658 on chromosomes 12 and 30 were indicative of polymorphic inversion (Ma & Amos, 2012; Ruiz-  
659 Arenas et al., 2019). To further characterise whether they represent polymorphic inversions,  
660 we intended to locate breakpoints by two independent approaches.

661 **Soft-clip reads** We attempted to identify positions where presence of soft-clipping of mapped  
662 reads is associated with PCA-based genotype of the putative inversions. First, we extracted  
663 focal regions around boundaries of the outliers (Sup. Table 4) from read mapping file of  
664 all individuals using `SAMtools` (Danecek et al., 2021). Next, we identified soft clip reads in  
665 each extracted region using `samextractclip` (Lindenbaum, 2015), and obtained reference  
666 position corresponding to the position of soft clipping in mapped reads using a custom script.  
667 At all extracted soft-clip positions, we counted the number of reads that switch to soft-clip  
668 (“soft-clip depth”), as well as the depth of mapped reads, using `SAMtools`. At each of all  
669 positions with at least one read supporting soft-clip switch, we calculated proportion of reads  
670 with soft-clip switch relative to all mapped reads (depth of the position) for each individual

671 (“soft-clip proportion”). This resulted in “position-by-individual” matrix whose entry depicts  
672 the proportion of soft-clip in all reads mapped at the focal position for the focal individual.  
673 Using this matrix, we fit a linear model (soft-clip proportion  $\sim$  PCA – based genotype) in R at  
674 each position treating genotypes AA, AB, and BB as 0, 1, and 2. Based on the significance of  
675 genotype and  $R^2$  of the linear models, we generated a list of 14 positions at which soft-clip  
676 proportion was significantly associated with genotype of the putative inversions. We visualised  
677 the distribution of the soft-clip proportion at these positions (Sup. Fig. 15) and selected six  
678 positions for which the soft-clip proportion of BB was high enough and that of AB was around a  
679 half of BB based on the assumption that soft clip reads covering an inversion breakpoint should  
680 originate from haplotype B and non-soft clip reads should originate from haplotype A (Sup.  
681 Table 5). To investigate whether some of these six positions represent inversion breakpoints,  
682 we asked whether the soft-clipped segments of the reads have homologous sequences at the  
683 other end of the outlier regions. We extracted soft-clipped segments of reads mapped at the  
684 focal six positions in AB and BB individuals using a custom script, and re-mapped these  
685 segments (instead of the entire reads) to the blackcap reference using `BWA mem`. We computed  
686 the depth of mapped segments in each position using `SAMtools` (Sup. Table 5).

687 **10x linked read** We used an independent set of blackcap individuals (hereafter “10x  
688 individuals”) whose genomes were sequenced with the 10x linked-read technology (Delmore  
689 et al., 2023, NCBI BioProject PRJEB65115). We genotyped the 10x individuals at the two  
690 putative inversion loci (i.e. AA, AB, or BB) based on genotypes at diagnostic SNP positions.  
691 We started by determining diagnostic SNP positions using our Illumina short read-based  
692 resequence data. Because usable diagnostic SNP positions should have genotypes perfectly  
693 associated with PCA-based genotype, we focused on positions at which  $F_{ST}$  was 1 between  
694 AA and BB, and all AB were heterozygous, using `VCFtools` and `BCFtools`. We also recorded  
695 mapping between an allele at the diagnostic positions and a genotype of the putative inversion  
696 (“A- and B-diagnostic alleles”, e.g. G for haplotype A, T for haplotype B).

697 We then counted the number of sites with A- and B-diagnostic allele in each of 10x  
698 samples. To convert coordinates of 10x assemblies to the reference coordinate, we mapped  
699 the 10x pseudo-haplotyped assemblies to the blackcap reference using `minimap2` (Li, 2018).

700 To determine the putative inversion genotype in the 10x individuals, we counted the number  
701 of positions with A-diagnostic and B-diagnostic alleles for each 10x pseudo-haplotype, and  
702 calculated the proportion of sites with A-diagnostic and B-diagnostic sites. In principle, an  
703 AA and a BB individual respectively are expected to have proportion of 100% and 0% of  
704 A-diagnostic sites in both of two pseudo-haplotypes, while an AB individual is expected to  
705 have 100% of A-diagnostic sites in one pseudo-haplotype and 0% for the other. For genotyping,  
706 we set the following three thresholds.

- 707 1. Missingness at the diagnostic positions is less than 10%, after removing positions with  
708 non-unique `minimap2` mapping (i.e. at least 90% of all diagnostic positions should have  
709 depth of 1x).
- 710 2. More than 90% of all diagnostic sites should agree per pseudo-haplotype.
- 711 3. The second criterion should be fulfilled for both pseudo-haplotypes of an individual.

712 We identified two BB individuals for each of the putative inversions on chromosomes 12  
713 and 30. There were no AB individuals passing the above threshold, indicating 10x pseudo-  
714 haplotyping is not accurate in separating two diverged non-recombining alleles at a long range  
715 in an individual that has both. To identify breakpoints, we aligned the pseudo-haplotype  
716 assemblies of these BB individuals as well as one AA individual for each putative inversion to  
717 the blackcap reference using `Nucmer4` (Marçais et al., 2018), and generated dot plots (Sup.  
718 Fig. 16).

719 **Sequence analysis at breakpoint of putative inversion on chromosome 12** 10x  
720 contigs of pseudo-haplotype B aligned next to the putative breakpoint position of blackcap  
721 reference chromosome 12 had an un-aligned flanking sequence. To characterise the DNA  
722 sequence of these flanking segments, we extracted the flanking sequences using `SAMtools`,  
723 aligned the sequences to themselves using `minimap2`, and generated self-dot plots (Sup. Fig.  
724 17), revealing presence of tandem repeats. To identify unit of tandem repeats within the  
725 flanking sequences, we ran `TandemRepeatsFinder` against these extracted sequences, resulting  
726 in four consensus unit sequences of 144 bp based on two contigs from two individuals. To  
727 confirm that the four consensus sequences represent the same tandem repeat (because the unit



728 of identical tandem repeat can have different phases), we ran BLASTn (version 2.10.1, Altschul  
729 et al., 1990) with each consensus as query against dimers of the consensus. To investigate  
730 whether the tandem repeat found at the putative breakpoint of chromosome 12 in haplotype  
731 B is present in chromosome 12 and other chromosomes of the reference and corresponding  
732 position of haplotype A, we ran BLASTn with the 144 bp consensus of the tandem repeat unit as  
733 the query against blackcap reference and a contig of an AA individual that spans the breakpoint  
734 position, and counted how many copies were found in each reference chromosome/scaffold and  
735 the 10x contig (Sup. Fig. 18).

### 736 **Selection in blackcaps**

737 To test for selection in different outlier regions and to compare them with the genome-wide  
738 base line, we computed nucleotide diversity ( $\pi$ ) and Tajima's D in 10 kb sliding windows  
739 per population using PopGenome (Pfeifer et al., 2014) and VCFtools (Danecek et al., 2011)  
740 respectively. The effects of the outlier regions on these statistics were tested using a linear  
741 mixed effects model (`nlme::lme` (Pinheiro et al., 2021)) and a generalised linear mixed effects  
742 model with a Gamma distribution (`lme4::glmer` (Bates et al., 2015)). To test for selection in  
743 genes  $d_N/d_S$  were computed following the counting method by Nei & Gojobori (1986). Gene  
744 annotation of the blackcap was obtained from Bascón-Cardozo et al. (2022b).

### 745 **Tandem repeats within and outside outlier regions**

746 To characterise correlation between outlier regions with distinct patterns of genetic variation  
747 and tandem repeats, we identified tandem repeats in the reference genome and compared the  
748 distribution of the tandem repeats with genomic regions with distinct patterns of genetic vari-  
749 ation. First, TandemRepeatsFinder (Benson, 1999) was run on the blackcap reference genome  
750 with the parameter set recommended on the documentation (`trf </path/to/fast> 2 7 7`  
751 `80 10 50 500 -f -d -m -h`). The output was formatted and summarised for visualisation  
752 using custom scripts. Briefly, distribution of tandem repeats with a different unit size along  
753 the genome was summarised in 100 kb sliding windows in blocks of repeat unit sizes of 10 bp  
754 step (Sup. Fig. 33). Tandem repeats with the six longest repeat unit size were extracted per  
755 chromosome, and copy number for each tandem repeat was counted (Sup. Fig. 34).



756 Next, we tested whether the number of tandem repeats with long repeat unit were  
757 enriched in outlier regions at species-wide and population-specific low-recombining regions. We  
758 extracted tandem repeats with repeat unit size greater than or equal to 150 bp, and counted  
759 the number of tandem repeats (instead of total copy number) within and outside outlier  
760 regions. We performed Fisher's exact tests to test independence between the number of long  
761 tandem repeats and the mode of recombination suppression (species-wide/population-specific)  
762 (Sup. Table 7) using `fisher.test` function in R.

## 763 **Simulation**

### 764 **Validation of LD-based inference of recombination landscape using non-randomly** 765 **chosen samples**

766 We asked whether LD-based recombination map inference using individuals chosen based on  
767 the karyotype instead of at random is informative of the underlying mode of recombination  
768 suppression. To this end, we simulated two 5 Mb-long chromosomes with neutral mutation rate  
769 of  $4.6 \times 10^{-8}$  in a population of 1,000 individuals in SLiM. The purpose of these simulations  
770 was to investigate the effect of an inversion and additional recombination suppression on  
771 recombination rate inference and LD in general, rather than investigating the effects specific to  
772 blackcap demography. As such, we kept the population size smaller than the blackcap effective  
773 population size and the mutation rate greater than assumed in order to minimise the time  
774 and computational resource for simulations. We introduced a mutation (inversion marker)  
775 on one chromosome at 1 Mb position at the 50th generation. We simulated an inversion on  
776 the chromosome by suppressing recombination in an interval from 1 Mb to 4 Mb position if  
777 the inversion marker site was heterozygous. We defined additional suppression according to  
778 different scenarios (models 1-6 in Sup. Table 6). We applied negative frequency-dependent  
779 selection (fitness of inversion is  $1 - (p_{inv} - 0.2)$  where  $p_{inv}$  is the frequency of the inversion  
780 allele). 1,000 generations after the inversion event, we recorded the mutations in all samples,  
781 making a VCF file including all samples. Although 1,000 generations is relatively short given  
782 the population size of 1,000, the haplotype structure at the inversion locus was stable in test  
783 runs of model-1 (inversion frequency of 0.2 without additional recombination suppression).

784 Based on the genotype at 1 Mb position, we randomly chose 10 samples for each inversion  
785 genotype. `Pyrho` was run to estimate recombination rates using the chosen 10 samples, with  
786 the block penalty 50 and window size 50. The inferred recombination maps are in Sup. Fig.  
787 13.

### 788 **Effects of recombination suppression model on recombination rate inference at an** 789 **inversion**

790 Three clusters of individuals observed in PCA at five outlier regions indicate presence of  
791 distinct haplotypes. Polymorphic inversions are known to show this pattern due to suppression  
792 of recombination between the normal and inverted alleles (Wellenreuther & Bernatchez, 2018).  
793 To test whether some of the five outlier regions represent polymorphic inversions, we intended  
794 to infer recombination rates using AA, AB, and BB individuals separately based on linkage  
795 disequilibrium (LD) patterns. Before addressing this in blackcaps empirically, we assessed  
796 how different types of recombination suppression at a haplotype block affect inference of  
797 recombination landscape using a set of individuals with a certain combination of haplotypes.  
798 To investigate the effect of a genotype-specific suppression of recombination on LD-based  
799 inference of recombination rate, we simulated different modes of recombination suppression  
800 using `SLiM` version 3.5 (Haller & Messer, 2019) under six scenarios listed in Sup. Table 6.  
801 Specifically, we performed 1,000 replicates of forward-time simulations of two 500 kb-long  
802 chromosomes with neutral mutation rate of  $1 \times 10^{-7}$  [per site per generation] and recombination  
803 rate of  $1 \times 10^{-6}$  [per site per generation] in a population of 1,000 diploid individuals under  
804 the Wright-Fisher model (We downscaled the population size and upscaled mutation rate to  
805 minimise the time and computational resource for simulation). We introduced a mutation  
806 (inversion marker) on one chromosome at 100 kb position at the 50th generation. We modelled  
807 an inversion by suppressing recombination in an interval from 100 kb to 400 kb position if  
808 the inversion marker site was heterozygous. We defined additional suppression according  
809 to different scenarios (models 1-6). To allow for the inversion to remain in the population,  
810 we applied negative frequency-dependent selection (fitness of inversion is  $1 - (p_{inv} - 0.2)$  for  
811 models 1-3 and  $1 - (p_{inv} - 0.8)$  for models 4-6 where  $p_{inv}$  is the frequency of the inversion  
812 allele). 1,000 generations after the inversion event, we recorded the mutations in all samples,

813 making a VCF file including all individuals. Although 1,000 generations is relatively short  
814 given the population size of 1,000, the haplotype structure at the inversion locus was stable in  
815 test runs of model-1 (inversion frequency of 0.2 without additional recombination suppression).  
816 Based on the genotype at the marker, we randomly sampled 10 individuals for each inversion  
817 genotype. `Pyrho` was run to estimate recombination rates using the sampled 10 individuals,  
818 with the block penalty 50 and window size 50. The inferred recombination landscape is in  
819 Sup. Fig. 13.

## 820 **Coalescent simulation of species-wide reduction of recombination rate**

821 To discern the effect of reduced recombination rate, demographic history, and unequal sample  
822 sizes among population on outlier regions identified by `lostruct`, we performed neutral  
823 coalescent simulations using `msprime` version 1.2.0 (Baumdicker et al., 2022). We simulated a  
824 1-Mb long recombining chromosome with a mutation rate of  $4.6 \times 10^{-9}$  [per site per generation].  
825 We implemented 11 models differing in the recombination maps, population subdivision, and  
826 demographic history (Sup. Fig. 19). In models 1-3, the recombination rate was set to  $4.6 \times 10^{-9}$   
827 [per site per generation] throughout the entire chromosome, and they differ in population  
828 subdivision (model 1: panmictic, model 2, subdivision of five equal populations without gene  
829 flow, model 3: subdivision of equally-sized populations with gene flow between two pairs  
830 of populations (symmetric migration rate of 0.025 [per generation])). In models with five  
831 populations, we distributed the sample of 100 individuals unequally, as in our blackcap dataset  
832 (50, 20, 10, 10, 10 individuals for five populations). In models 4-7, we introduced reduced  
833 recombination rate in the middle of the chromosome (0.4 to 0.6 Mb) with the same demographic  
834 histories as models 2 and 3. In addition to the uniform recombination map, we prepared  
835 two recombination maps with reduced recombination rate: “low-rec” with one-hundredth the  
836 background recombination rate, and “no-rec” with recombination rate of 0. In models 8-11,  
837 we used the same two recombination maps with reduced recombination rate in the middle,  
838 with different demography: 10 times increase in effective population size in one population,  
839 and 10 times decrease in effective population size in three populations, which roughly reflects  
840 inferred demography of blackcap populations (Delmore et al., 2020b). For each model, we ran  
841 1,000 replicates of simulations and recorded SNPs in VCF format.

842 To identify outlier regions, we ran `lostruct` the same way as in the empirical analysis.  
843 To evaluate how reduced recombination rate affects the mean and variance of population  
844 genetic summary statistics, we computed nucleotide diversity ( $\pi$ ), Tajima's D, and  $F_{ST}$ , using  
845 `VCFTools`. The outliers detected by `lostruct` are in Sup. Fig. 20. The summary statistics  
846 are in Sup. Figs. 21, 22, 23.

#### 847 **Forward simulation of species-wide reduction of recombination rate**

848 To investigate how species-wide low-recombining regions affect patterns of local genetic variation  
849 depicted in local PCA, we performed forward simulation with `SLiM` version 4.0.1 (Haller &  
850 Messer, 2022). We simulated 100 replicates of two 500 kb-long chromosomes with neutral  
851 mutation rate of  $1 \times 10^{-7}$  [per site per generation] and recombination rate of  $1 \times 10^{-6}$  [per  
852 site per generation] except for an interval from 100 to 400 [kb] of the first chromosome  
853 where recombination rate was set to  $1 \times 10^{-9}$ , which is 1/1000 of the normally recombining  
854 chromosome. First, we ran a burn-in of 4,000 generations for an ancestral population of 1,000  
855 diploids. After the burn-in, we made three populations of 1,000 diploids (pop1, pop2, and  
856 pop3) split from the ancestral population. We sampled 50 individuals per population every 20  
857 generations over 1,000 generations after the population split and recorded SNPs in VCF. For  
858 each time point of each of 100 simulation replicates, we performed PCA with `PLINK`, using  
859 SNPs either within 100 to 400 [kb] of the first chromosome (pop1-specific suppression) or the  
860 normally recombining chromosome.

861 We investigated how reduced recombination rate affects representation of population  
862 subdivision in local PCA. To evaluate whether the individuals from different populations were  
863 distributed differently in local PCA at the low-recombining region, we performed Fasano-  
864 Franceschini test (Fasano & Franceschini, 1987), which is a multi-dimensional extension of  
865 Kolmogorov-Smirnov test, in three pairs of populations (pop1-pop2, pop1-pop3, pop2-pop3).  
866 We counted the number of significant pairs of populations (0, 1, 2, or 3) for each time point of  
867 each replicate. We compared between the low-recombining and normally recombining regions  
868 the number of pairs of populations with distinct distribution in PCA (Sup. Fig. 31).

## 869 **Forward simulation of population-specific reduction of recombination rate**

870 To investigate how evolution of low-recombining regions in population(s) affect patterns of  
871 local genetic variation depicted in local PCA, we performed forward simulation with SLiM  
872 version 4.0.1. We simulated two 500kb-long chromosomes with neutral mutation rate and  
873 recombination rate of  $1 \times 10^{-7}$  [per site per generation] and  $1 \times 10^{-6}$  [per site per generation].  
874 First, we ran a burn-in of 4,000 generations for an ancestral population of 1,000 diploids. After  
875 the burn-in, we made three populations of 1,000 diploids (pop1, pop2, and pop3) split from the  
876 ancestral population, after which gene flow between all pairs of populations were set to 0.0025.  
877 We introduced recombination suppression in pop1 from 100 to 400 [kb] of the first chromosome  
878 in two scenarios. In the first scenario, recombination suppression was introduced at the same  
879 time of the split. In the second scenario, recombination suppression was introduced 4,000  
880 generations after the population split event, allowing the three populations to differentiate  
881 before population-specific recombination suppression was introduced in pop1. We sampled 50  
882 individuals per population every 20 generations over 1,000 generations after the introduction of  
883 the population-specific suppression of recombination and recorded SNPs in VCF. For each time  
884 point of each of 1,000 simulation replicates, we performed PCA with PLINK, using SNPs either  
885 within 100 to 400 [kb] of the first chromosome (pop1-specific suppression) or the normally  
886 recombining chromosome.

887 To characterise factors represented in the primary axes of distinct local PCA at population-  
888 specific low-recombining regions, we performed one replicate of SLiM simulation with the same  
889 scenarios of models 1 and 2 recording the full ancestry and mutations in tree sequence, with an  
890 increased duration of burn-in (40,000 generations) to make sure that all lineages at sampling  
891 time coalesce. We loaded the tree sequence with mutations in `tskit` (Kelleher et al., 2018)  
892 and sampled 50 diploids per population, and saved SNPs in VCF. Using the VCF files for  
893 each time point for each model, we performed PCA using PLINK at the population-specific  
894 low-recombining region, and determined one time point per model showing typical spread  
895 of individuals from the low-recombining population in PCA (Sup. Fig. 27A, E). For these  
896 PCAs we identified 5% SNPs with the highest loadings to the first two PC axes. We analysed  
897 these mutations on the underlying genealogies using `tskit`. Specifically, we investigated

898 whether mutations originating from the low-recombining population were enriched in the  
899 high-loading mutations (Sup. Fig. 27C, G) with a  $\chi^2$  test. We also assessed whether multiple  
900 mutations originating in the low-recombining population occurring on the same genealogical  
901 branches (i.e. mutations on the same ancestral haplotypes) were enriched in the high-loading  
902 mutations (Sup. Fig. 27D, H). For this, we compared the number of mutations sharing  
903 the same genealogical branches among the high-loading mutations originating from the low-  
904 recombining population and the same number of randomly-selected mutations originating from  
905 the low-recombining population by a Kolmogorov-Smirnov test.

## 906 **Effects of linked selection on local PCA**

907 **Background selection** To investigate the linked effect of purifying selection at low-  
908 recombining regions (background selection) on patterns of local genetic variation represented  
909 in local PCA, we performed forward simulation with SLiM version 4.0.1. We simulated a  
910 species-wide low-recombining region in three populations as described above, except we changed  
911 the distribution of fitness effect of mutations with three different ratios between neutral (“n”,  
912  $s = 0$ ) and deleterious (“d”,  $s = -0.05$  and  $h = 0.5$ ) mutations of  $n/(n + d) = 0, 0.25, 0.5, 0.75$ .  
913 To evaluate whether individuals from different populations were distributed differently in the  
914 local PCA at the low-recombining region, we performed Fasano-Franceschini test between  
915 three pairs of populations (pop1-pop2, pop1-pop3, pop2-pop3). We counted the number of  
916 significant pairs of populations (0, 1, 2, or 3) for each sampled time point of each replicate  
917 (out of 100) for each DFE (Sup. Fig. 31).

918 **Positive selection** To investigate the linked effect of positive selection at low-recombining  
919 regions on patterns of local genetic variation represented in local PCA, we performed forward  
920 simulation with SLiM version 4.0.1 under four scenarios: population-specific sweep and sweep  
921 before populations split, with and without reduced local recombination rate. We simulated  
922 10 replicates of one 500 kb-long chromosome with neutral mutation rate of  $1 \times 10^{-7}$  [per site  
923 per generation] and recombination rate of  $1 \times 10^{-6}$  [per site per generation]. In scenarios  
924 with reduced recombination rate, we introduced a reduced recombination rate within an  
925 interval from 100 to 400 [kb] of the chromosome where recombination rate was set to  $1 \times 10^{-9}$ ,

926 which is 1/1000 of the normally recombining regions. For all scenarios, we ran a burn-in  
927 of 4,000 generations for an ancestral population of 1,000 diploids. In the scenarios with  
928 population-specific sweep, we made three populations of 1,000 diploids (pop1, pop2, and  
929 pop3) split from the ancestral population at the 4000-th generation. We introduced a strongly  
930 beneficial mutation ( $s = 1$  and  $h = 0.5$ ) in the middle of a chromosome of one randomly  
931 selected sample of the first population at the 100-th generation after the populations split. In  
932 the scenarios with sweep before split, we introduced a strongly beneficial mutation ( $s = 1$  and  
933  $h = 0.5$ ) in the middle of the chromosome of one randomly selected sample of the ancestral  
934 population, and made the three populations of 1,000 diploids split at the 100-th generation  
935 after the introduction of the beneficial mutation. We sampled 100 diploid individuals per  
936 population every 20 generations since the introduction of the beneficial mutation (scenarios of  
937 population-specific sweep) or the split (scenarios of ancestral sweep) and recorded the SNPs in  
938 VCF format. We performed PCA using PLINK.

## 939 **Acknowledgment**

940 This work was supported by the Max Planck Society (Max Planck Research Group grant  
941 MFFALIMN0001 to ML), the DFG (project Z02 and Nav05 within SFB 1372 – Magnetore-  
942 ception and Navigation in Vertebrates to ML), and DFG Research Infrastructure NGS\_CC  
943 (project 407495230) as part of the Next Generation Sequencing Competence Network (project  
944 423957469). AR was supported by the Intramural Research Program of the NHGRI, NIH  
945 (1ZIAHG200398). JCI was funded by two research grants from the Spanish Ministry of Science,  
946 Innovation and Universities, and the European Regional Development Fund (PGC2018-  
947 097575-B-I00; PID2022-140091NB-I00). We thank Britta Meyer, Tianhao Zhao, Hanna Koch,  
948 Conny Burghardt, and Sven Künzel for DNA extraction, library preparation, and/or se-  
949 quencing. We are grateful to Julien Dutheil, Diethard Tautz, Linda Odenthal-Hesse, Tobias  
950 Kaiser, Carolina Peralta, and Matthias Weissensteiner for constructive discussion. We are  
951 grateful to Thord Fransson, Christos Barboutis, Zura Javakhishvili, Martim Melo, Álvaro  
952 Ramírez, and Helena Batalha for providing us with samples. Permits were provided to JCI  
953 for samples collected on Cape Verde (Ministerio do Ambiente - Habitacao e Ordenamento

954 do Territorio, 18/CITES/DNA, 17 Dec 2015), Canary Islands (Ref.: 2012/0710), Madeira  
955 (Ref.: 02/2016), and the Azores (Instituto da Conservacao da Natureza e da Biodiversi-  
956 dade, 171/2008, 31 Mar 2009); to JP-T for samples collected on Mallorca (CAP 64/2009);  
957 to Thord Fransson for samples collected on Crete (6Υ0Ξ4653Π8-ΥΓ5 issued by the Hellenic  
958 Ministry of Environment and Energy), and to Zura Javakhishvili for samples collected in  
959 Georgia (889-0-2-202303291450 by the Ministry of Environment and Agriculture of Georgia).  
960 A preprint version of this article has been peer-reviewed and recommended by PCIEvolBiol  
961 (<https://doi.org/10.24072/pci.evolbiol.100711>).

## 962 **Data availability**

963 The primary and alternate haplotype assemblies of the blackcap reference genome can be found  
964 under NCBI BioProject PRJNA558064 (accession GCA\_009819655.1) and PRJNA558065  
965 (accession GCA\_009819715.1). Raw Illumina reads for the resequencing data can be accessed  
966 under NCBI BioProject PRJEB66075 (SRA accession ERP151147). Processed data and scripts  
967 for analysis and simulation are found in Zenodo (<https://doi.org/10.5281/zenodo.10623362>).

## 968 **Conflict of interest**

969 The authors declare no conflict of interest.

## 970 **Author contributions**

971 JI and ML designed the study. Reference genome was generated by JF, AR, JM, BH, WC,  
972 JC, KH, MU, OF, and EDJ. JP-T and JCI collected samples for resequencing. AB performed  
973 read mapping, variant calling, and data filtration. KB-C inferred recombination maps. JI  
974 conducted haplotype inference, population genomics analyses, simulations, sequence analyses,  
975 statistical modelling, and data visualisation. JI and ML wrote the manuscript with inputs  
976 from other authors.



## 977 References

- 978 Altschul, S. F., Gish, W., Miller, W., Myers, E. W., & Lipman, D. J. (1990). Basic  
979 local alignment search tool. *Journal of Molecular Biology*, *215*(3), 403–410. [https://doi.org/10.1016/S0022-2836\(05\)80360-2](https://doi.org/10.1016/S0022-2836(05)80360-2)  
980
- 981 Auton, A., Li, Y. R., Kidd, J., Oliveira, K., Nadel, J., Holloway, J. K., Hayward, J. J.,  
982 Cohen, P. E., Grealis, J. M., Wang, J., Bustamante, C. D., & Boyko, A. R. (2013).  
983 Genetic Recombination Is Targeted towards Gene Promoter Regions in Dogs. *PLOS*  
984 *Genetics*, *9*(12), e1003984. <https://doi.org/10.1371/journal.pgen.1003984>
- 985 Baker, Z., Schumer, M., Haba, Y., Bashkirova, L., Holland, C., Rosenthal, G. G., &  
986 Przeworski, M. (2017). Repeated losses of PRDM9-directed recombination despite the  
987 conservation of PRDM9 across vertebrates. *eLife*, *6*, e24133. [https://doi.org/10.7554/](https://doi.org/10.7554/eLife.24133)  
988 [eLife.24133](https://doi.org/10.7554/eLife.24133)
- 989 Barton, N. H., & Etheridge, A. M. (2004). The Effect of Selection on Genealogies. *Genetics*,  
990 *166*(2), 1115–1131. <https://doi.org/10.1093/genetics/166.2.1115>
- 991 Bascón-Cardozo, K., Bours, A., Ishigohoka, J., Odenthal-Hesse, L., & Liedvogel, M.  
992 (2022a). *Historical recombination maps diverge between Eurasian blackcap populations*  
993 *with distinct migratory strategies* [Preprint]. Authorea. [https://doi.org/10.22541/au.16](https://doi.org/10.22541/au.166790167.72861799/v1)  
994 [6790167.72861799/v1](https://doi.org/10.22541/au.166790167.72861799/v1)
- 995 Bascón-Cardozo, K., Bours, A., Manthey, G., Pruischer, P., Durieux, G., Dutheil, J.,  
996 Odenthal-Hesse, L., & Liedvogel, M. (2022b). *Fine-scale map reveals highly variable*  
997 *recombination rates associated with genomic features in the European blackcap* [Preprint].  
998 Authorea. <https://doi.org/10.22541/au.165423614.49331155/v1>
- 999 Bates, D., Mächler, M., Bolker, B., & Walker, S. (2015). Fitting Linear Mixed-Effects  
1000 Models Using lme4. *Journal of Statistical Software*, *67*(1), 1–48. [https://doi.org/10.186](https://doi.org/10.18637/jss.v067.i01)  
1001 [37/jss.v067.i01](https://doi.org/10.18637/jss.v067.i01)
- 1002 Baudat, F., Buard, J., Grey, C., Fledel-Alon, A., Ober, C., Przeworski, M., Coop, G.,  
1003 & Massy, B. de. (2010). PRDM9 Is a Major Determinant of Meiotic Recombination  
1004 Hotspots in Humans and Mice. *Science*, *327*(5967), 836–840. [https://doi.org/10.1126/](https://doi.org/10.1126/science.1183439)  
1005 [science.1183439](https://doi.org/10.1126/science.1183439)
- 1006 Baumdicker, F., Bisschop, G., Goldstein, D., Gower, G., Ragsdale, A. P., Tsambos, G., Zhu,  
1007 S., Eldon, B., Ellerman, E. C., Galloway, J. G., Gladstein, A. L., Gorjanc, G., Guo, B.,  
1008 Jeffery, B., Kretzschmar, W. W., Lohse, K., Matschiner, M., Nelson, D., Pope, N. S.,  
1009 et al. (2022). Efficient ancestry and mutation simulation with msprime 1.0. *Genetics*,  
1010 *220*(3), iyab229. <https://doi.org/10.1093/genetics/iyab229>
- 1011 Benson, G. (1999). Tandem repeats finder: A program to analyze DNA sequences. *Nucleic*  
1012 *Acids Research*, *27*(2), 573–580. <https://doi.org/10.1093/nar/27.2.573>
- 1013 Berthold, P. (1988). Evolutionary aspects of migratory behavior in European warblers.  
1014 *Journal of Evolutionary Biology*, *1*(3), 195–209. [https://doi.org/https://doi.org/10.104](https://doi.org/https://doi.org/10.1046/j.1420-9101.1998.1030195.x)  
1015 [6/j.1420-9101.1998.1030195.x](https://doi.org/https://doi.org/10.1046/j.1420-9101.1998.1030195.x)

- 1016 Berthold, P. (1991). Genetic control of migratory behaviour in birds. *Trends in Ecology*  
1017 *and Evolution*, 6(8), 254–257. [https://doi.org/10.1016/0169-5347\(91\)90072-6](https://doi.org/10.1016/0169-5347(91)90072-6)
- 1018 Bhatia, G., Patterson, N., Sankararaman, S., & Price, A. L. (2013). Estimating and  
1019 interpreting FST: The impact of rare variants. *Genome Research*, 23(9), 1514–1521.  
1020 <https://doi.org/10.1101/gr.154831.113>
- 1021 Birtle, Z., & Ponting, C. P. (2006). Meisetz and the birth of the KRAB motif. *Bioinform-*  
1022 *atics*, 22(23), 2841–2845. <https://doi.org/10.1093/bioinformatics/btl498>
- 1023 Booker, T. R., Yeaman, S., & Whitlock, M. C. (2020). Variation in recombination rate  
1024 affects detection of outliers in genome scans under neutrality. *Molecular Ecology*, 29(22),  
1025 4274–4279. <https://doi.org/https://doi.org/10.1111/mec.15501>
- 1026 Burri, R. (2017). Interpreting differentiation landscapes in the light of long-term linked  
1027 selection. *Evolution Letters*, 1(3), 118–131. <https://doi.org/https://doi.org/10.1002/evl3.14>
- 1029 Burri, R., Nater, A., Kawakami, T., Mugal, C. F., Olason, P. I., Smeds, L., Suh, A.,  
1030 Dutoit, L., Bureš, S., Garamszegi, L. Z., Hogner, S., Moreno, J., Qvarnström, A.,  
1031 Ružić, M., Sæther, S.-A., Sætre, G.-P., Török, J., & Ellegren, H. (2015). Linked  
1032 selection and recombination rate variation drive the evolution of the genomic landscape  
1033 of differentiation across the speciation continuum of Ficedula flycatchers. *Genome*  
1034 *Research*, 25(11), 1656–1665. <https://doi.org/10.1101/gr.196485.115>
- 1035 Cao, Y., Li, L., Xu, M., Feng, Z., Sun, X., Lu, J., Xu, Y., Du, P., Wang, T., Hu, R., Ye,  
1036 Z., Shi, L., Tang, X., Yan, L., Gao, Z., Chen, G., Zhang, Y., Chen, L., Ning, G., et al.  
1037 (2020). The ChinaMAP analytics of deep whole genome sequences in 10,588 individuals.  
1038 *Cell Research*, 30(9), 717–731. <https://doi.org/10.1038/s41422-020-0322-9>
- 1039 Cruickshank, T. E., & Hahn, M. W. (2014). Reanalysis suggests that genomic islands  
1040 of speciation are due to reduced diversity, not reduced gene flow. *Molecular Ecology*,  
1041 23(13), 3133–3157. <https://doi.org/https://doi.org/10.1111/mec.12796>
- 1042 Danecek, P., Auton, A., Abecasis, G., Albers, C. A., Banks, E., DePristo, M. A., Handsaker,  
1043 R. E., Lunter, G., Marth, G. T., Sherry, S. T., McVean, G., Durbin, R., & 1000 Genomes  
1044 Project Analysis Group. (2011). The variant call format and VCFtools. *Bioinformatics*,  
1045 27(15), 2156–2158. <https://doi.org/10.1093/bioinformatics/btr330>
- 1046 Danecek, P., Bonfield, J. K., Liddle, J., Marshall, J., Ohan, V., Pollard, M. O., Whitwham,  
1047 A., Keane, T., McCarthy, S. A., Davies, R. M., & Li, H. (2021). Twelve years of SAMtools  
1048 and BCFtools. *GigaScience*, 10(giab008). <https://doi.org/10.1093/gigascience/giab008>
- 1049 DeGiorgio, M., Huber, C. D., Hubisz, M. J., Hellmann, I., & Nielsen, R. (2016).  
1050 SweepFinder2: Increased sensitivity, robustness and flexibility. *Bioinformatics*, 32(12),  
1051 1895–1897. <https://doi.org/10.1093/bioinformatics/btw051>
- 1052 Delaneau, O., Zagury, J.-F., & Marchini, J. (2013). Improved whole-chromosome phasing  
1053 for disease and population genetic studies. *Nature Methods*, 10(1), 5–6. <https://doi.org/10.1038/nmeth.2307>
- 1055 Delmore, K., Doren, B. M. V., Ullrich, K., Curk, T., Jeugd, H. P. van der, & Liedvogel, M.  
1056 (2023). *Structural genomic variation and migratory behavior in wild songbirds* [Preprint].

- 1057 bioRxiv. <https://doi.org/10.1101/2023.04.24.538030>
- 1058 Delmore, K. E., Hübner, S., Kane, N. C., Schuster, R., Andrew, R. L., Câmara, F.,  
1059 Guigó, R., & Irwin, D. E. (2015). Genomic analysis of a migratory divide reveals  
1060 candidate genes for migration and implicates selective sweeps in generating islands  
1061 of differentiation. *Molecular Ecology*, *24*(8), 1873–1888. <https://doi.org/https://doi.org/10.1111/mec.13150>
- 1062
- 1063 Delmore, K. E., Lugo Ramos, J. S., Van Doren, B. M., Lundberg, M., Bensch, S., Irwin,  
1064 D. E., & Liedvogel, M. (2018). Comparative analysis examining patterns of genomic  
1065 differentiation across multiple episodes of population divergence in birds. *Evolution*  
1066 *Letters*, *2*(2), 76–87. <https://doi.org/10.1002/evl3.46>
- 1067 Delmore, K. E., Van Doren, B. M., Conway, G. J., Curk, T., Garrido-Garduño, T., Germain,  
1068 R. R., Hasselmann, T., Hiemer, D., Jeugd, H. P. van der, Justen, H., Lugo Ramos,  
1069 J. S., Maggini, I., Meyer, B. S., Phillips, R. J., Remisiewicz, M., Roberts, G. C. M.,  
1070 Sheldon, B. C., Vogl, W., & Liedvogel, M. (2020a). Individual variability and versatility  
1071 in an eco-evolutionary model of avian migration. *Proceedings of the Royal Society B:*  
1072 *Biological Sciences*, *287*(1938), 20201339. <https://doi.org/10.1098/rspb.2020.1339>
- 1073 Delmore, K., Illera, J. C., Pérez-Tris, J., Segelbacher, G., Ramos, J. S., Durieux, G.,  
1074 Ishigohoka, J., & Liedvogel, M. (2020b). The evolutionary history and genomics of  
1075 european blackcap migration. *eLife*, *9*, e54462. <https://doi.org/10.7554/eLife.54462>
- 1076 Duthel, J. Y., Ganapathy, G., Hobolth, A., Mailund, T., Uyenoyama, M. K., & Schierup,  
1077 M. H. (2009). Ancestral Population Genomics: The Coalescent Hidden Markov Model  
1078 Approach. *Genetics*, *183*(1), 259–274. <https://doi.org/10.1534/genetics.109.103010>
- 1079 Ewels, P., Magnusson, M., Lundin, S., & Käller, M. (2016). MultiQC: Summarize analysis  
1080 results for multiple tools and samples in a single report. *Bioinformatics*, *32*(19),  
1081 3047–3048. <https://doi.org/10.1093/bioinformatics/btw354>
- 1082 Faria, R., Johannesson, K., Butlin, R. K., & Westram, A. M. (2019). Evolving Inversions.  
1083 *Trends in Ecology & Evolution*, *34*(3), 239–248. <https://doi.org/10.1016/j.tree.2018.12>  
1084 .005
- 1085 Fasano, G., & Franceschini, A. (1987). A multidimensional version of the Kolmogorov–  
1086 Smirnov test. *Monthly Notices of the Royal Astronomical Society*, *225*(1), 155–170.  
1087 <https://doi.org/10.1093/mnras/225.1.155>
- 1088 Fay, J. C., & Wu, C.-I. (2000). Hitchhiking Under Positive Darwinian Selection. *Genetics*,  
1089 *155*(3), 1405–1413. <https://doi.org/10.1093/genetics/155.3.1405>
- 1090 Fedorova, S. A., Reidla, M., Metspalu, E., Metspalu, M., Rootsi, S., Tambets, K., Trofimova,  
1091 N., Zhadanov, S. I., Kashani, B. H., Olivieri, A., Voevoda, M. I., Osipova, L. P.,  
1092 Platonov, F. A., Tomsy, M. I., Khusnutdinova, E. K., Torroni, A., & VILLEMS, R. (2013).  
1093 Autosomal and uniparental portraits of the native populations of Sakha (Yakutia):  
1094 Implications for the peopling of Northeast Eurasia. *BMC Evolutionary Biology*, *13*(1),  
1095 127. <https://doi.org/10.1186/1471-2148-13-127>
- 1096 Geraldès, A., Basset, P., Smith, K. L., & Nachman, M. W. (2011). Higher differentiation  
1097 among subspecies of the house mouse (*Mus musculus*) in genomic regions with low

- 1098 recombination. *Molecular Ecology*, 20(22), 4722–4736. [https://doi.org/10.1111/j.1365-](https://doi.org/10.1111/j.1365-294X.2011.05285.x)  
1099 [294X.2011.05285.x](https://doi.org/10.1111/j.1365-294X.2011.05285.x)
- 1100 Ghurye, J., Rhie, A., Walenz, B. P., Schmitt, A., Selvaraj, S., Pop, M., Phillippy, A. M., &  
1101 Koren, S. (2019). Integrating Hi-C links with assembly graphs for chromosome-scale  
1102 assembly. *PLoS Computational Biology*, 15(8), e1007273. [https://doi.org/10.1371/jour](https://doi.org/10.1371/journal.pcbi.1007273)  
1103 [nal.pcbi.1007273](https://doi.org/10.1371/journal.pcbi.1007273)
- 1104 Griffiths, R. C., & Marjoram, P. (1997). An ancestral recombination graph. In P. Donnelly  
1105 & S. Tavaré (Eds.), *Progress in Population Genetics and Human Evolution* (Vol. 87,  
1106 pp. 257–270). Springer. <http://lamastex.org/recomb/ima.pdf>
- 1107 Guan, D., McCarthy, S. A., Wood, J., Howe, K., Wang, Y., & Durbin, R. (2020). Identifying  
1108 and removing haplotypic duplication in primary genome assemblies. *Bioinformatics*,  
1109 36(9), 2896–2898. <https://doi.org/10.1093/bioinformatics/btaa025>
- 1110 Guerrero, R. F., Rousset, F., & Kirkpatrick, M. (2012). Coalescent patterns for chromosomal  
1111 inversions in divergent populations. *Philosophical Transactions of the Royal Society B:*  
1112 *Biological Sciences*, 367(1587), 430–438. <https://doi.org/10.1098/rstb.2011.0246>
- 1113 Hager, E. R., Harringmeyer, O. S., Wooldridge, T. B., Theingi, S., Gable, J. T., McFadden,  
1114 S., Neugeboren, B., Turner, K. M., Jensen, J. D., & Hoekstra, H. E. (2022). A  
1115 chromosomal inversion contributes to divergence in multiple traits between deer mouse  
1116 ecotypes. *Science*, 377(6604), 399–405. <https://doi.org/10.1126/science.abg0718>
- 1117 Haller, B. C., & Messer, P. W. (2019). SLiM 3: Forward Genetic Simulations Beyond  
1118 the Wright–Fisher Model. *Molecular Biology and Evolution*, 36(3), 632–637. <https://doi.org/10.1093/molbev/msy228>
- 1119
- 1120 Haller, B. C., & Messer, P. W. (2022). SLiM 4: Multispecies Eco-Evolutionary Modeling.  
1121 *The American Naturalist*, E000–E000. <https://doi.org/10.1086/723601>
- 1122 Hejase, H. A., Salman-Minkov, A., Campagna, L., Hubisz, M. J., Lovette, I. J., Gronau,  
1123 I., & Siepel, A. (2020). Genomic islands of differentiation in a rapid avian radiation  
1124 have been driven by recent selective sweeps. *Proceedings of the National Academy of*  
1125 *Sciences*, 117(48), 30554–30565. <https://doi.org/10.1073/pnas.2015987117>
- 1126 Helbig, A. J. (1991). Inheritance of migratory direction in a bird species: A cross-breeding  
1127 experiment with SE- and SW-migrating blackcaps (*Sylvia atricapilla*). *Behavioral*  
1128 *Ecology and Sociobiology*, 28(1), 9–12. <https://doi.org/10.1007/BF00172133>
- 1129 Howe, K., Chow, W., Collins, J., Pelan, S., Pointon, D.-L., Sims, Y., Torrance, J., Tracey,  
1130 A., & Wood, J. (2021). Significantly improving the quality of genome assemblies through  
1131 curation. *GigaScience*, 10(1), giaa153. <https://doi.org/10.1093/gigascience/giaa153>
- 1132 Huang, K., Andrew, R. L., Owens, G. L., Ostevik, K. L., & Rieseberg, L. H. (2020).  
1133 Multiple chromosomal inversions contribute to adaptive divergence of a dune sunflower  
1134 ecotype. *Molecular Ecology*, 29(14), 2535–2549. [https://doi.org/https://doi.org/10.1111/mec.15428](https://doi.org/10.1111/mec.15428)
- 1135
- 1136 Hudson, R. R. (1983). Properties of a neutral allele model with intragenic recombination.  
1137 *Theoretical Population Biology*, 23(2), 183–201. [https://doi.org/10.1016/0040-5809\(83\)](https://doi.org/10.1016/0040-5809(83)90013-8)  
1138 [\)90013-8](https://doi.org/10.1016/0040-5809(83)90013-8)

- 1139 Irwin, D. E., Milá, B., Toews, D. P. L., Brelsford, A., Kenyon, H. L., Porter, A. N., Grossen,  
1140 C., Delmore, K. E., Alcaide, M., & Irwin, J. H. (2018). A comparison of genomic islands  
1141 of differentiation across three young avian species pairs. *Molecular Ecology*, *27*(23),  
1142 4839–4855. <https://doi.org/10.1111/mec.14858>
- 1143 Jones, F. C., Grabherr, M. G., Chan, Y. F., Russell, P., Mauceli, E., Johnson, J., Swofford,  
1144 R., Pirun, M., Zody, M. C., White, S., Birney, E., Searle, S., Schmutz, J., Grimwood,  
1145 J., Dickson, M. C., Myers, R. M., Miller, C. T., Summers, B. R., Knecht, A. K., et  
1146 al. (2012). The genomic basis of adaptive evolution in threespine sticklebacks. *Nature*,  
1147 *484*(7392), 55–61. <https://doi.org/10.1038/nature10944>
- 1148 Kawakami, T., Mugal, C. F., Suh, A., Nater, A., Burri, R., Smeds, L., & Ellegren, H.  
1149 (2017). Whole-genome patterns of linkage disequilibrium across flycatcher populations  
1150 clarify the causes and consequences of fine-scale recombination rate variation in birds.  
1151 *Molecular Ecology*, *26*(16), 4158–4172. <https://doi.org/10.1111/mec.14197>
- 1152 Kelleher, J., Thornton, K. R., Ashander, J., & Ralph, P. L. (2018). Efficient pedigree  
1153 recording for fast population genetics simulation. *PLOS Computational Biology*, *14*(11),  
1154 e1006581. <https://doi.org/10.1371/journal.pcbi.1006581>
- 1155 Knief, U., Hemmrich-Stanisak, G., Wittig, M., Franke, A., Griffith, S. C., Kempnaers, B.,  
1156 & Forstmeier, W. (2016). Fitness consequences of polymorphic inversions in the zebra  
1157 finch genome. *Genome Biology*, *17*(1), 199. <https://doi.org/10.1186/s13059-016-1056-3>
- 1158 Kong, A., Thorleifsson, G., Gudbjartsson, D. F., Masson, G., Sigurdsson, A., Jonasdottir,  
1159 A., Walters, G. B., Jonasdottir, A., Gylfason, A., Kristinsson, K. T., Gudjonsson, S. A.,  
1160 Frigge, M. L., Helgason, A., Thorsteinsdottir, U., & Stefansson, K. (2010). Fine-scale  
1161 recombination rate differences between sexes, populations and individuals. *Nature*,  
1162 *467*(7319), 1099–1103. <https://doi.org/10.1038/nature09525>
- 1163 Kronforst, M. R., Hansen, M. E. B., Crawford, N. G., Gallant, J. R., Zhang, W., Kulathinal,  
1164 R. J., Kapan, D. D., & Mullen, S. P. (2013). Hybridization Reveals the Evolving  
1165 Genomic Architecture of Speciation. *Cell Reports*, *5*(3), 666–677. <https://doi.org/10.1016/j.celrep.2013.09.042>
- 1167 Lamichhaney, S., Han, F., Berglund, J., Wang, C., Almén, M. S., Webster, M. T., Grant,  
1168 B. R., Grant, P. R., & Andersson, L. (2016). A beak size locus in Darwin’s finches  
1169 facilitated character displacement during a drought. *Science*, *352*(6284), 470–474.  
1170 <https://doi.org/10.1126/science.aad8786>
- 1171 Lawniczak, M. K. N., Emrich, S. J., Holloway, A. K., Regier, A. P., Olson, M., White,  
1172 B., Redmond, S., Fulton, L., Appelbaum, E., Godfrey, J., Farmer, C., Chinwalla,  
1173 A., Yang, S.-P., Minx, P., Nelson, J., Kyung, K., Walenz, B. P., Garcia-Hernandez,  
1174 E., Aguiar, M., et al. (2010). Widespread Divergence Between Incipient *Anopheles*  
1175 *gambiae* Species Revealed by Whole Genome Sequences. *Science*, *330*(6003), 512–514.  
1176 <https://doi.org/10.1126/science.1195755>
- 1177 Lewanski, A. L., Grudler, M. C., & Bradburd, G. S. (2024). The era of the ARG:  
1178 An introduction to ancestral recombination graphs and their significance in empirical  
1179 evolutionary genomics. *PLOS Genetics*, *20*(1), e1011110. [https://doi.org/10.1371/jour](https://doi.org/10.1371/journal.pgen.1011110)  
1180 [nal.pgen.1011110](https://doi.org/10.1371/journal.pgen.1011110)



- 1181 Li, H. (2013). *Aligning sequence reads, clone sequences and assembly contigs with BWA-*  
1182 *MEM* [Preprint]. arXiv. <https://doi.org/https://doi.org/10.48550/arXiv.1303.3997>
- 1183 Li, H. (2018). Minimap2: Pairwise alignment for nucleotide sequences. *Bioinformatics*,  
1184 *34*(18), 3094–3100. <https://doi.org/10.1093/bioinformatics/bty191>
- 1185 Li, H., & Ralph, P. (2019). Local PCA Shows How the Effect of Population Structure  
1186 Differs Along the Genome. *Genetics*, *211*(1), 289–304. <https://doi.org/10.1534/genetics.118.301747>  
1187
- 1188 Lindenbaum, P. (2015). *JVarkit: Java-based utilities for Bioinformatics*. <https://doi.org/10.6084/m9.figshare.1425030.v1>  
1189
- 1190 Lotterhos, K. E. (2019). The Effect of Neutral Recombination Variation on Genome Scans  
1191 for Selection. *G3 GenesGenomesGenetics*, *9*(6), 1851–1867. <https://doi.org/10.1534/g3.119.400088>  
1192
- 1193 Lundberg, M., Mackintosh, A., Petri, A., & Bensch, S. (2021). *Inversions maintain*  
1194 *differences between migratory phenotypes of a songbird*. bioRxiv. <https://doi.org/10.1101/2021.04.05.438456>  
1195
- 1196 Ma, J., & Amos, C. I. (2012). Investigation of Inversion Polymorphisms in the Human  
1197 Genome Using Principal Components Analysis. *PLOS ONE*, *7*(7), e40224. <https://doi.org/10.1371/journal.pone.0040224>  
1198
- 1199 Malinsky, M., Challis, R. J., Tyers, A. M., Schiffels, S., Terai, Y., Ngatunga, B. P., Miska,  
1200 E. A., Durbin, R., Genner, M. J., & Turner, G. F. (2015). Genomic islands of speciation  
1201 separate cichlid ecomorphs in an East African crater lake. *Science*, *350*(6267), 1493–1498.  
1202 <https://doi.org/10.1126/science.aac9927>
- 1203 Marçais, G., Delcher, A. L., Phillippy, A. M., Coston, R., Salzberg, S. L., & Zimin, A.  
1204 (2018). MUMmer4: A fast and versatile genome alignment system. *PLOS Computational*  
1205 *Biology*, *14*(1), e1005944. <https://doi.org/10.1371/journal.pcbi.1005944>
- 1206 Martin, S. H., Davey, J. W., & Jiggins, C. D. (2015). Evaluating the Use of ABBA–BABA  
1207 Statistics to Locate Introgressed Loci. *Molecular Biology and Evolution*, *32*(1), 244–257.  
1208 <https://doi.org/10.1093/molbev/msu269>
- 1209 Martin, S. H., Davey, J. W., Salazar, C., & Jiggins, C. D. (2019). Recombination rate  
1210 variation shapes barriers to introgression across butterfly genomes. *PLoS Biology*, *17*(2),  
1211 1–28. <https://doi.org/10.1371/journal.pbio.2006288>
- 1212 Martin, S. H., & Van Belleghem, S. M. (2017). Exploring Evolutionary Relationships  
1213 Across the Genome Using Topology Weighting. *Genetics*, *206*(1), 429–438. <https://doi.org/10.1534/genetics.116.194720>  
1214
- 1215 McKenna, A., Hanna, M., Banks, E., Sivachenko, A., Cibulskis, K., Kernytsky, A., Garimella,  
1216 K., Altshuler, D., Gabriel, S., Daly, M., & DePristo, M. A. (2010). The Genome Analysis  
1217 Toolkit: A MapReduce framework for analyzing next-generation DNA sequencing data.  
1218 *Genome Research*, *20*(9), 1297–1303. <https://doi.org/10.1101/gr.107524.110>
- 1219 McVean, G. (2009). A Genealogical Interpretation of Principal Components Analysis.  
1220 *PLOS Genetics*, *5*(10), e1000686. <https://doi.org/10.1371/journal.pgen.1000686>

- 1221 McVean, G. A. T., & Cardin, N. J. (2005). Approximating the coalescent with recombination.  
1222 *Philosophical Transactions of the Royal Society B: Biological Sciences*, 360(1459), 1387–  
1223 1393. <https://doi.org/10.1098/rstb.2005.1673>
- 1224 Mérot, C., Berdan, E. L., Cayuela, H., Djambazian, H., Ferchaud, A.-L., Laporte, M.,  
1225 Normandeau, E., Ragoussis, J., Wellenreuther, M., & Bernatchez, L. (2021). Locally  
1226 Adaptive Inversions Modulate Genetic Variation at Different Geographic Scales in a  
1227 Seaweed Fly. *Molecular Biology and Evolution*, 38(9), 3953–3971. <https://doi.org/10.1093/molbev/msab143>  
1228
- 1229 Myers, S., Freeman, C., Auton, A., Donnelly, P., & McVean, G. (2008). A common sequence  
1230 motif associated with recombination hot spots and genome instability in humans. *Nature*  
1231 *Genetics*, 40(9), 1124–1129. <https://doi.org/10.1038/ng.213>
- 1232 Neafsey, D. E., Lawniczak, M. K. N., Park, D. J., Redmond, S. N., Coulibaly, M. B.,  
1233 Traoré, S. F., Sagnon, N., Costantini, C., Johnson, C., Wiegand, R. C., Collins, F.  
1234 H., Lander, E. S., Wirth, D. F., Kafatos, F. C., Besansky, N. J., Christophides, G.  
1235 K., & Muskavitch, M. A. T. (2010). SNP Genotyping Defines Complex Gene-Flow  
1236 Boundaries Among African Malaria Vector Mosquitoes. *Science*, 330(6003), 514–517.  
1237 <https://doi.org/10.1126/science.1193036>
- 1238 Nei, M., & Gojobori, T. (1986). Simple methods for estimating the numbers of synonymous  
1239 and nonsynonymous nucleotide substitutions. *Molecular Biology and Evolution*, 3(5),  
1240 418–426. <https://doi.org/10.1093/oxfordjournals.molbev.a040410>
- 1241 Nielsen, R. (2005). Molecular Signatures of Natural Selection. *Annual Review of Genetics*,  
1242 39(1), 197–218. <https://doi.org/10.1146/annurev.genet.39.073003.112420>
- 1243 Noor, M., & Bennett, S. (2009). Islands of speciation or mirages in the desert? Examining  
1244 the role of restricted recombination in maintaining species. *Heredity*, 103, 439–444.
- 1245 Okonechnikov, K., Conesa, A., & García-Alcalde, F. (2016). Qualimap 2: Advanced multi-  
1246 sample quality control for high-throughput sequencing data. *Bioinformatics*, 32(2),  
1247 292–294. <https://doi.org/10.1093/bioinformatics/btv566>
- 1248 Pamilo, P., & Nei, M. (1988). Relationships between gene trees and species trees. *Molecular*  
1249 *Biology and Evolution*, 5(5), 568–583. <https://doi.org/10.1093/oxfordjournals.molbev.a040517>  
1250
- 1251 Patterson, N., Moorjani, P., Luo, Y., Mallick, S., Rohland, N., Zhan, Y., Genschoreck,  
1252 T., Webster, T., & Reich, D. (2012). Ancient Admixture in Human History. *Genetics*,  
1253 192(3), 1065–1093. <https://doi.org/10.1534/genetics.112.145037>
- 1254 Patterson, N., Price, A. L., & Reich, D. (2006). Population Structure and Eigenanalysis.  
1255 *PLOS Genetics*, 2(12), e190. <https://doi.org/10.1371/journal.pgen.0020190>
- 1256 Peter, B. M. (2016). Admixture, Population Structure, and F-Statistics. *Genetics*, 202(4),  
1257 1485–1501. <https://doi.org/10.1534/genetics.115.183913>
- 1258 Peter, B. M. (2022). A geometric relationship of F2, F3 and F4-statistics with principal  
1259 component analysis. *Philosophical Transactions of the Royal Society B: Biological*  
1260 *Sciences*, 377(1852), 20200413. <https://doi.org/10.1098/rstb.2020.0413>

- 1261 Pfeifer, B., Wittelsbueger, U., Ramos-Onsins, S. E., & Lercher, M. J. (2014). PopGenome:  
1262 An Efficient Swiss Army Knife for Population Genomic Analyses in R. *Molecular Biology*  
1263 *and Evolution*, *31*, 1929–1936. <https://doi.org/10.1093/molbev/msu136>
- 1264 Pinheiro, J., Bates, D., DebRoy, S., Sarkar, D., & R Core Team. (2021). *Nlme: Linear and*  
1265 *Nonlinear Mixed Effects Models*. <https://CRAN.R-project.org/package=nlme>
- 1266 Pracana, R., Priyam, A., Levantis, I., Nichols, R. A., & Wurm, Y. (2017). The fire ant  
1267 social chromosome supergene variant *Sb* shows low diversity but high divergence from  
1268 *SB*. *Molecular Ecology*, *26*(11), 2864–2879. <https://doi.org/10.1111/mec.14054>
- 1269 Price, A. L., Patterson, N. J., Plenge, R. M., Weinblatt, M. E., Shadick, N. A., & Reich,  
1270 D. (2006). Principal components analysis corrects for stratification in genome-wide  
1271 association studies. *Nature Genetics*, *38*(8), 904–909. <https://doi.org/10.1038/ng1847>
- 1272 Purcell, S., Neale, B., Todd-Brown, K., Thomas, L., Ferreira, M. A. R., Bender, D., Maller,  
1273 J., Sklar, P., Bakker, P. I. W. de, Daly, M. J., & Sham, P. C. (2007). PLINK: A Tool Set  
1274 for Whole-Genome Association and Population-Based Linkage Analyses. *The American*  
1275 *Journal of Human Genetics*, *81*(3), 559–575. <https://doi.org/10.1086/519795>
- 1276 Ralph, P., Thornton, K., & Kelleher, J. (2020). Efficiently Summarizing Relationships in  
1277 Large Samples: A General Duality Between Statistics of Genealogies and Genomes.  
1278 *Genetics*, *215*(3), 779–797. <https://doi.org/10.1534/genetics.120.303253>
- 1279 Reich, D., Thangaraj, K., Patterson, N., Price, A. L., & Singh, L. (2009). Reconstructing  
1280 Indian population history. *Nature*, *461*(7263), 489–494. <https://doi.org/10.1038/nature08365>
- 1281
- 1282 Renaut, S., Grassa, C. J., Yeaman, S., Moyers, B. T., Lai, Z., Kane, N. C., Bowers, J.  
1283 E., Burke, J. M., & Rieseberg, L. H. (2013). Genomic islands of divergence are not  
1284 affected by geography of speciation in sunflowers. *Nature Communications*, *4*(1), 1827.  
1285 <https://doi.org/10.1038/ncomms2833>
- 1286 Rhie, A., McCarthy, S. A., Fedrigo, O., Damas, J., Formenti, G., Koren, S., Uliano-Silva,  
1287 M., Chow, W., Fungtammasan, A., Kim, J., Lee, C., Ko, B. J., Chaisson, M., Gedman,  
1288 G. L., Cantin, L. J., Thibaud-Nissen, F., Haggerty, L., Bista, I., Smith, M., et al. (2021).  
1289 Towards complete and error-free genome assemblies of all vertebrate species. *Nature*,  
1290 *592*(7856), 737–746. <https://doi.org/10.1038/s41586-021-03451-0>
- 1291 Roesti, M., Moser, D., & Berner, D. (2013). Recombination in the threespine stickleback  
1292 genome—patterns and consequences. *Molecular Ecology*, *22*(11), 3014–3027. <https://doi.org/10.1111/mec.12322>
- 1293
- 1294 Rougemont, Q., Xuereb, A., Dallaire, X., Moore, J.-S., Normandeau, E., Rondeau, E.  
1295 B., Withler, R. E., Van Doornik, D. M., Crane, P. A., Naish, K. A., Garza, J. C.,  
1296 Beacham, T. D., Koop, B. F., & Bernatchez, L. (2021). Long-distance migration is a  
1297 major factor driving local adaptation at continental scale in Coho salmon. *Molecular*  
1298 *Ecology*, *n/a*(*n/a*). <https://doi.org/10.1111/mec.16339>
- 1299 Rubin, C.-J., Enbody, E. D., Dobreva, M. P., Abzhanov, A., Davis, B. W., Lamichhaney, S.,  
1300 Pettersson, M., Sendell-Price, A. T., Sprehn, C. G., Valle, C. A., Vasco, K., Wallerman,  
1301 O., Grant, B. R., Grant, P. R., & Andersson, L. (2022). Rapid adaptive radiation



- 1302 of Darwin's finches depends on ancestral genetic modules. *Science Advances*, 8(27),  
1303 eabm5982. <https://doi.org/10.1126/sciadv.abm5982>
- 1304 Ruiz-Arenas, C., Cáceres, A., López-Sánchez, M., Tolosana, I., Pérez-Jurado, L., & González,  
1305 J. R. (2019). scoreInvHap: Inversion genotyping for genome-wide association studies.  
1306 *PLOS Genetics*, 15(7), e1008203. <https://doi.org/10.1371/journal.pgen.1008203>
- 1307 Sabeti, P. C., Reich, D. E., Higgins, J. M., Levine, H. Z. P., Richter, D. J., Schaffner, S.  
1308 F., Gabriel, S. B., Platko, J. V., Patterson, N. J., McDonald, G. J., Ackerman, H. C.,  
1309 Campbell, S. J., Altshuler, D., Cooper, R., Kwiatkowski, D., Ward, R., & Lander, E.  
1310 S. (2002). Detecting recent positive selection in the human genome from haplotype  
1311 structure. *Nature*, 419(6909), 832–837. <https://doi.org/10.1038/nature01140>
- 1312 Sabeti, P. C., Varilly, P., Fry, B., Lohmueller, J., Hostetter, E., Cotsapas, C., Xie, X.,  
1313 Byrne, E. H., McCarroll, S. A., Gaudet, R., Schaffner, S. F., Lander, E. S., Frazer, K.  
1314 A., Ballinger, D. G., Cox, D. R., Hinds, D. A., Stuve, L. L., Gibbs, R. A., Belmont, J.  
1315 W., et al. (2007). Genome-wide detection and characterization of positive selection in  
1316 human populations. *Nature*, 449(7164), 913–918. <https://doi.org/10.1038/nature06250>
- 1317 Setter, D., Mousset, S., Cheng, X., Nielsen, R., DeGiorgio, M., & Hermisson, J. (2020).  
1318 VolcanoFinder: Genomic scans for adaptive introgression. *PLOS Genetics*, 16(6),  
1319 e1008867. <https://doi.org/10.1371/journal.pgen.1008867>
- 1320 Shao, C., Sun, S., Liu, K., Wang, J., Li, S., Liu, Q., Deagle, B. E., Seim, I., Biscontin, A.,  
1321 Wang, Q., Liu, X., Kawaguchi, S., Liu, Y., Jarman, S., Wang, Y., Wang, H.-Y., Huang,  
1322 G., Hu, J., Feng, B., et al. (2023). The enormous repetitive Antarctic krill genome  
1323 reveals environmental adaptations and population insights. *Cell*, 186(6), 1279–1294.e19.  
1324 <https://doi.org/10.1016/j.cell.2023.02.005>
- 1325 Shipilina, D., Pal, A., Stankowski, S., Chan, Y. F., & Barton, N. H. (2023). On the  
1326 origin and structure of haplotype blocks. *Molecular Ecology*, 32(6), 1441–1457. <https://doi.org/10.1111/mec.16793>
- 1327
- 1328 Singhal, S., Leffler, E. M., Sannareddy, K., Turner, I., Venn, O., Hooper, D. M., Strand, A.  
1329 I., Li, Q., Raney, B., Balakrishnan, C. N., Griffith, S. C., McVean, G., & Przeworski,  
1330 M. (2015). Stable recombination hotspots in birds. *Science*, 350(6263), 928–932.  
1331 <https://doi.org/10.1126/science.aad0843>
- 1332 Smeds, L., Qvarnström, A., & Ellegren, H. (2016). Direct estimate of the rate of germline  
1333 mutation in a bird. *Genome Research*, 26(9), 1211–1218. <https://doi.org/10.1101/gr.204669.116>
- 1334
- 1335 Smukowski Heil, C. S., Ellison, C., Dubin, M., & Noor, M. A. F. (2015). Recombining  
1336 without Hotspots: A Comprehensive Evolutionary Portrait of Recombination in Two  
1337 Closely Related Species of *Drosophila*. *Genome Biology and Evolution*, 7(10), 2829–2842.  
1338 <https://doi.org/10.1093/gbe/evv182>
- 1339 Speidel, L., Forest, M., Shi, S., & Myers, S. R. (2019). A method for genome-wide  
1340 genealogy estimation for thousands of samples. *Nature Genetics*, 51(9), 1321–1329.  
1341 <https://doi.org/10.1038/s41588-019-0484-x>

- 1342 Spence, J. P., & Song, Y. S. (2019). Inference and analysis of population-specific fine-scale  
1343 recombination maps across 26 diverse human populations. *Science Advances*, *5*(10),  
1344 eaaw9206. <https://doi.org/10.1126/sciadv.aaw9206>
- 1345 Stern, A. J., Wilton, P. R., & Nielsen, R. (2019). An approximate full-likelihood method  
1346 for inferring selection and allele frequency trajectories from DNA sequence data. *PLoS*  
1347 *Genetics*, *15*(9), 1–32. <https://doi.org/10.1371/journal.pgen.1008384>
- 1348 Stevison, L. S., Hoehn, K. B., & Noor, M. A. F. (2011). Effects of Inversions on Within-  
1349 and Between-Species Recombination and Divergence. *Genome Biology and Evolution*,  
1350 *3*, 830–841. <https://doi.org/10.1093/gbe/evr081>
- 1351 Stevison, L. S., Woerner, A. E., Kidd, J. M., Kelley, J. L., Veeramah, K. R., McManus,  
1352 K. F., Great Ape Genome Project, Bustamante, C. D., Hammer, M. F., & Wall, J. D.  
1353 (2016). The Time Scale of Recombination Rate Evolution in Great Apes. *Molecular*  
1354 *Biology and Evolution*, *33*(4), 928–945. <https://doi.org/10.1093/molbev/msv331>
- 1355 Tajima, F. (1989). Statistical method for testing the neutral mutation hypothesis by DNA  
1356 polymorphism. *Genetics*, *123*(3), 585–595. <https://doi.org/PMC1203831>
- 1357 Taylor, J. E. (2013). The effect of fluctuating selection on the genealogy at a linked site.  
1358 *Theoretical Population Biology*, *87*, 34–50. <https://doi.org/10.1016/j.tpb.2013.03.004>
- 1359 Todesco, M., Owens, G. L., Bercovich, N., Légaré, J.-S., Soudi, S., Burge, D. O., Huang, K.,  
1360 Ostevik, K. L., Drummond, E. B. M., Imerovski, I., Lande, K., Pascual-Robles, M. A.,  
1361 Nanavati, M., Jahani, M., Cheung, W., Staton, S. E., Muños, S., Nielsen, R., Donovan,  
1362 L. A., et al. (2020). Massive haplotypes underlie ecotypic differentiation in sunflowers.  
1363 *Nature*, *584*(7822), 602–607. <https://doi.org/10.1038/s41586-020-2467-6>
- 1364 Van Doren, B. M., Campagna, L., Helm, B., Illera, J. C., Lovette, I. J., & Liedvogel, M.  
1365 (2017). Correlated patterns of genetic diversity and differentiation across an avian family.  
1366 *Molecular Ecology*, *26*(15), 3982–3997. <https://doi.org/10.1111/mec.14083>
- 1367 Voight, B. F., Kudaravalli, S., Wen, X., & Pritchard, J. K. (2006). A Map of Recent  
1368 Positive Selection in the Human Genome. *PLOS Biology*, *4*(3), e72. [https://doi.org/10](https://doi.org/10.1371/journal.pbio.0040072)  
1369 [.1371/journal.pbio.0040072](https://doi.org/10.1371/journal.pbio.0040072)
- 1370 Wakeley, J. (2008). *Coalescent Theory: An Introduction* (1st ed.). W. H. Freeman.
- 1371 Wakeley, J. (2020). Developments in coalescent theory from single loci to chromosomes.  
1372 *Theoretical Population Biology*, *133*, 56–64. <https://doi.org/10.1016/j.tpb.2020.02.002>
- 1373 Wellenreuther, M., & Bernatchez, L. (2018). Eco-Evolutionary Genomics of Chromosomal  
1374 Inversions. *Trends in Ecology & Evolution*, *33*(6), 427–440. [https://doi.org/10.1016/j.](https://doi.org/10.1016/j.tree.2018.04.002)  
1375 [tree.2018.04.002](https://doi.org/10.1016/j.tree.2018.04.002)
- 1376 Wiuf, C., & Hein, J. (1999). Recombination as a Point Process along Sequences. *Theoretical*  
1377 *Population Biology*, *55*(3), 248–259. <https://doi.org/10.1006/tpbi.1998.1403>
- 1378 Wolf, J. B. W., & Ellegren, H. (2017). Making sense of genomic islands of differentiation in  
1379 light of speciation. *Nature Reviews Genetics*, *18*(2), 87–100. [https://doi.org/10.1038/](https://doi.org/10.1038/nrg.2016.133)  
1380 [nrg.2016.133](https://doi.org/10.1038/nrg.2016.133)

1381 Yi, X., Liang, Y., Huerta-Sanchez, E., Jin, X., Cuo, Z. X. P., Pool, J. E., Xu, X.,  
1382 Jiang, H., Vinckenbosch, N., Korneliussen, T. S., Zheng, H., Liu, T., He, W., Li,  
1383 K., Luo, R., Nie, X., Wu, H., Zhao, M., Cao, H., et al. (2010). Sequencing of 50  
1384 Human Exomes Reveals Adaptation to High Altitude. *Science*, 329(5987), 75–78.  
1385 <https://doi.org/10.1126/science.1190371>
